# Supplementary material for: Investigating passive eDNA samplers and submergence times for marine surveillance
Source: PeerJ journal article supplement (doi:10.7717/peerj.19043), 2025-03-06

Figure S2: Principal component analysis(PCA) of community diversity matrix with deployment time displayed as an ordisurf layer.

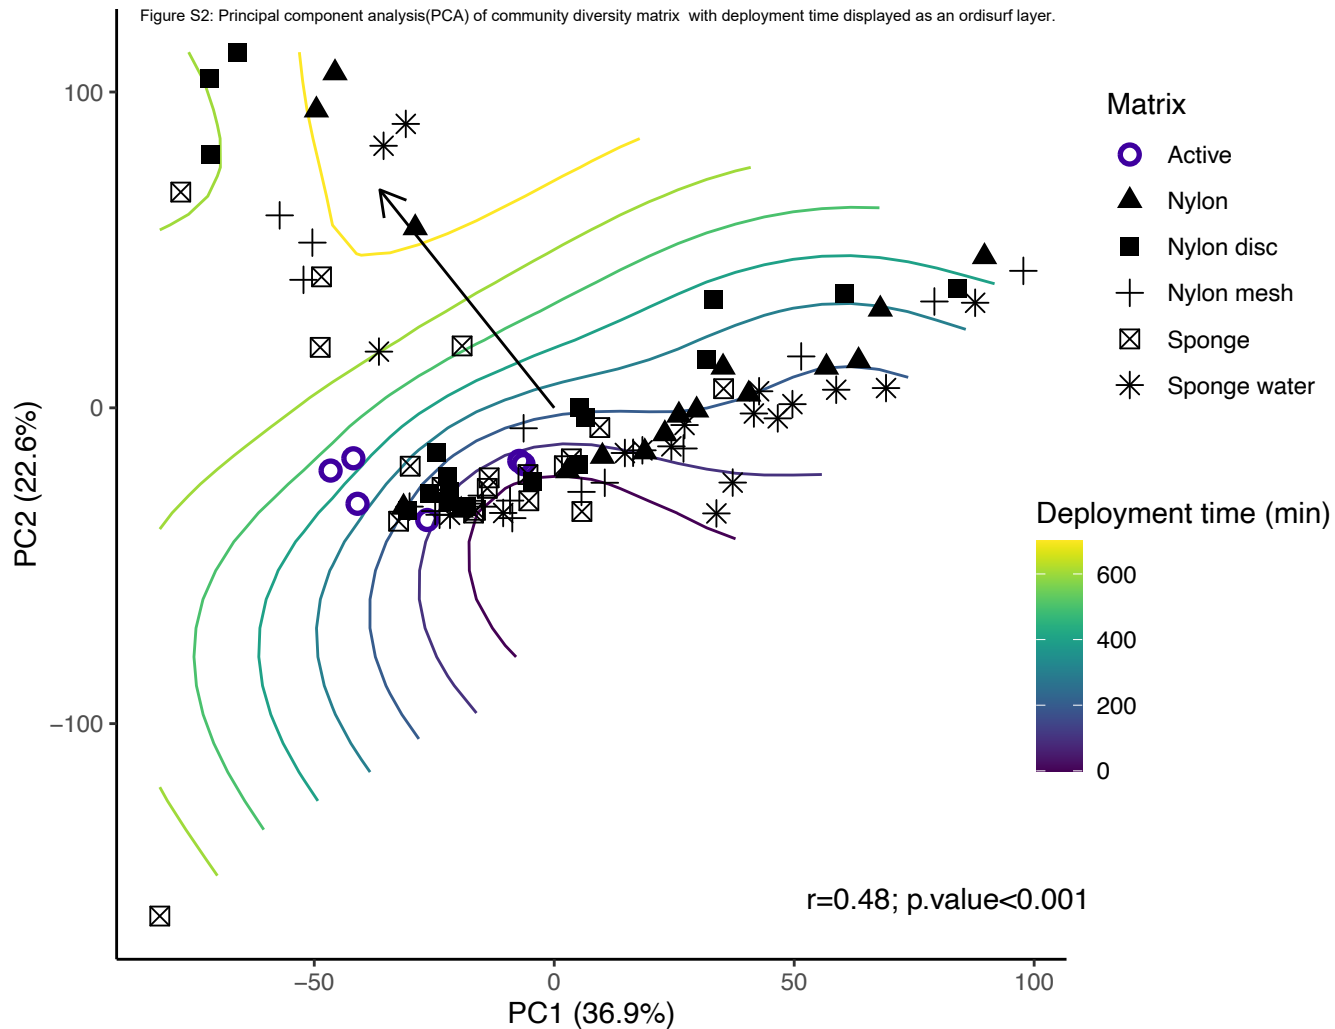

Supplement: Figure_S2.pdf [file Figure_S2.pdf]
