# Supplementary material for: Investigating passive eDNA samplers and submergence times for marine surveillance
Source: PeerJ. 2025 Mar 6;13:e19043. doi: 10.7717/peerj.19043 (PMC11890302; doi:10.7717/peerj.19043)
Supplement: Supplemental Information 3 — Raw reads, post demultiplexing, post filtering, post denoising, post merging and post chimera removal. [file peerj-13-19043-s003.xlsx]

## Sheet: Tables S1
Table S1: Raw read counts of the 18S metabarcoding dataset including raw reads, post demultiplexing, post filtering, post denoising, post merging and post chimera removal
Sample id	Sample name	Matrix	Time (min)	Raw reads	Post demultiplexing	Post filtering	Post denoising	Post merging	Post chimera removal
CAW-22-18-001	A0_1-1_T	active	0	148742	126991	72126	71250	59774	50864
CAW-22-18-002	A0_1-2	active	0	122221	104251	61416	60737	54906	44274
CAW-22-18-003	A0_1-3	active	0	123766	105794	60860	60116	54243	44909
CAW-22-18-004	S1-1	sponge	10	121910	104105	57083	56850	53343	52731
CAW-22-18-005	S1-2	sponge	10	151109	128876	72847	72601	65527	65215
CAW-22-18-006	S1-3	sponge	10	137560	117444	60455	60323	53637	53510
CAW-22-18-007	M1-1	nylon mesh	10	136287	115933	57459	56854	36230	31782
CAW-22-18-008	M1-2	nylon mesh	10	81120	69132	36719	36080	29153	26162
CAW-22-18-009	M1-3	nylon mesh	10	122891	104848	53451	52775	45647	39611
CAW-22-18-010	N1-1	nylon	10	106544	91086	52100	51573	41664	36431
CAW-22-18-011	N1-2	nylon	10	127414	108925	58549	58022	51501	46804
CAW-22-18-012	N1-3	nylon	10	101824	86763	47924	47298	39660	35612
CAW-22-18-013	D1-1	nylon disc	10	125501	107085	59800	59439	54744	51365
CAW-22-18-014	D1-2	nylon disc	10	78241	66840	29484	29029	25163	24677
CAW-22-18-015	D1-3_a_and_b	nylon disc	10	85397	72884	39492	39147	34486	33686
CAW-22-18-016	S2-1_a_and_b	sponge	30	102326	87588	50625	50448	47385	43864
CAW-22-18-017	S2-2_a_and_b	sponge	30	116765	99540	59718	59411	48886	43308
CAW-22-18-018	S2-3_a_and_b	sponge	30	100552	85628	47619	47386	42917	40397
CAW-22-18-019	M2-1_a_and_b	nylon mesh	30	104212	89054	49397	49007	42892	37174
CAW-22-18-020	M2-2-a_and_b	nylon mesh	30	103032	87926	47692	47140	41235	36465
CAW-22-18-021	M2-3_a_and_b	nylon mesh	30	90219	76802	39513	39095	34071	29948
CAW-22-18-022	N2-1_a_and_b	nylon	30	78823	67200	38036	37782	34852	31102
CAW-22-18-023	N2-2_a_and_b	nylon	30	108204	92370	51713	51435	48226	44438
CAW-22-18-024	N_2-3T	nylon	30	128841	110019	63253	63013	59015	54257
CAW-22-18-025	D2-1_a_and_b	nylon disc	30	80988	69379	38241	37796	33411	32156
CAW-22-18-026	D2-2_a_and_b	nylon disc	30	67349	57457	32317	32014	28173	27075
CAW-22-18-027	D2-3_a_and_b	nylon disc	30	79904	68234	37037	36669	30934	28891
CAW-22-18-028	S3-1_a_and_b	sponge	60	86695	74450	41111	40877	37669	35841
CAW-22-18-029	S3-2_a_and_b	sponge	60	57557	49176	27454	27131	23480	21822
CAW-22-18-030	S3-3_ a_and_b	sponge	60	97390	83092	43078	42796	36021	33694
CAW-22-18-031	M3-1_a_and_b	nylon mesh	60	65604	56294	29634	29281	26573	24332
CAW-22-18-032	M3-2_a_and_b	nylon mesh	60	107051	91595	49386	49026	43817	38705
CAW-22-18-033	M3-3_a_and_b	nylon mesh	60	107702	91753	46305	46117	42412	38618
CAW-22-18-034	N3-1_a_and_b	nylon	60	118641	0	0	0	0	0
CAW-22-18-035	N3-2_a_and_b	nylon	60	116157	99029	50766	50306	46299	43689
CAW-22-18-036	N3-3_a_and_b	nylon	60	104784	89111	48204	47959	45114	41411
CAW-22-18-037	D3-1_a_and_b	nylon disc	60	111612	95233	50819	50362	45423	43420
CAW-22-18-038	D3-2_a_and_b	nylon disc	60	60850	51823	23634	23445	20959	19653
CAW-22-18-039	D3-3T	nylon disc	60	57466	48622	24862	24545	20974	19858
CAW-22-18-040	S4-1_a_and_b	sponge	180	62330	53038	28902	28730	28276	27242
CAW-22-18-041	S4-2_a_and_b	sponge	180	67464	57313	29403	29190	27081	25966
CAW-22-18-042	S4-3_a_and_b	sponge	180	81678	69283	33603	33238	31334	27423
CAW-22-18-043	M4-1_a_and_b	nylon mesh	180	84533	71929	38774	38230	35246	28685
CAW-22-18-044	M4-2_a_and_b	nylon mesh	180	113717	96773	49793	49518	46102	38907
CAW-22-18-045	M4-3_a_and_b	nylon mesh	180	111780	95057	47539	47167	43860	36697
CAW-22-18-046	N4-1_a_and_b	nylon	180	128209	109371	59219	58995	55879	49029
CAW-22-18-047	N4-2_a_and_b	nylon	180	106758	91133	49323	49116	45913	40521
CAW-22-18-048	N4-3_a_and_b	nylon	180	123721	105476	57950	57827	54854	50735
CAW-22-18-049	D4-1_a_and_b	nylon disc	180	125097	106963	58909	58604	51528	45801
CAW-22-18-050	D4-2_a_and_b	nylon disc	180	99916	85325	49260	48887	43332	39255
CAW-22-18-051	D4-3_a_and_b	nylon disc	180	128174	109202	61765	61597	56511	51848
CAW-22-18-052	S5-1T	sponge	360	118294	106890	31636	31535	31183	30987
CAW-22-18-053	S5-1_a_and_b	sponge	360	115893	99292	57308	57031	53194	48584
CAW-22-18-054	S5-2_a_and_b	sponge	360	121705	103413	57240	56844	53411	44818
CAW-22-18-055	S5-3_a_and_b	sponge	360	120778	103057	59060	58593	54619	48353
CAW-22-18-056	M5-1_a_and_b	nylon mesh	360	119444	102055	50696	50183	46150	38581
CAW-22-18-057	M5_2T	nylon mesh	360	165325	140823	77505	76904	69966	58531
CAW-22-18-058	M5-3_a_and_b	nylon mesh	360	150832	128675	74275	73838	68196	53616
CAW-22-18-059	N5-1_a_and_b	nylon	360	87383	74794	32364	32195	30376	28148
CAW-22-18-060	N5-2_a_and_b	nylon	360	118871	101798	59132	58782	51799	46360
CAW-22-18-061	N5-3_a_and_b	nylon	360	131592	112221	65134	64837	60956	55978
CAW-22-18-062	D5-1_a_and_b	nylon disc	360	118987	101860	56544	56302	52080	47745
CAW-22-18-063	D5-2_a_and_b	nylon disc	360	132586	112990	61052	60564	54458	45300
CAW-22-18-064	D5-3_a_and_b	nylon disc	360	124526	106301	59879	59570	55586	51452
CAW-22-18-065	N6-1_a_and_b	nylon	720	124199	106169	61669	61293	57910	46557
CAW-22-18-066	N6-2_a_and_b	nylon	720	118642	101069	53707	53274	49078	37398
CAW-22-18-067	N6-3_a_and_b	nylon	720	148592	127027	71957	71438	64578	50637
CAW-22-18-068	D6-1_a_and_b	nylon disc	720	117428	100281	57278	56862	54385	44767
CAW-22-18-069	D6-2_a_and_b	nylon disc	720	92511	78718	43238	42964	41066	34525
CAW-22-18-070	D6-3_a_and_b	nylon disc	720	167320	143011	83099	82669	78591	58483
CAW-22-18-071	A12_1-1_A02-1_a_and_b	active	720	122183	104438	59920	59295	52415	45142
CAW-22-18-072	A12_1-2_A02-2_a_and_b	active	720	129822	110813	67211	66582	59883	48051
CAW-22-18-073	A12_1-3_A02-3_a_and_b	active	720	77828	66428	39764	39314	36164	28904
CAW-22-18-074	Whole_sponge_6-2T	sponge water	720	70764	60597	34150	33696	30927	26113
CAW-22-18-075	Blank_D_a_and_b	field blank	0	104242	88923	53160	53109	49391	49245
CAW-22-18-076	Blank_M_a_and_b	field blank	0	54581	46630	25483	25457	11068	11063
CAW-22-18-077	Blank_N_a_and_b	field blank	0	133729	116625	48460	48377	43605	43088
CAW-22-18-078	M6-1_a_and_b	nylon mesh	720	101214	86172	46299	45779	42126	31867
CAW-22-18-079	M6-2_a_and_b	nylon mesh	720	99504	85084	47459	46933	43964	33750
CAW-22-18-080	M6-3_a_and_b	nylon mesh	720	88852	75741	41459	40882	37400	29526
CAW-22-18-081	S6-1_a_and_b	sponge	720	132038	112671	60957	60179	55111	46248
CAW-22-18-082	S6-2_a_and_b	sponge	720	169375	144801	88993	88803	88050	83014
CAW-22-18-083	S6-3_a_and_b	sponge	720	120734	102993	49593	49133	42956	37044
CAW-22-18-084	Blank_A_Labelled_Blank_Buffer_a_and_b	field blank	0	137363	117234	60581	60505	59697	58957
CAW-22-18-085	Blank_Whole_Sponge_a_and_b	field blank	0	140683	127865	35639	35633	35543	35461
CAW-22-18-086	Whole_sponge_WS1-1_a_and_b	sponge water	10	186572	159523	87079	86552	82641	80655
CAW-22-18-087	Whole_sponge_WS1.2_a_and_b	sponge water	10	86497	73586	35309	35223	22365	21951
CAW-22-18-088	Whole_sponge_WS1-3_a_and_b	sponge water	10	156703	134093	71790	71379	66159	59755
CAW-22-18-089	Whole_sponge_WS2-1	sponge water	30	93971	80201	45217	45042	40409	36743
CAW-22-18-090	Whole_sponge_WS2-2	sponge water	30	98874	84324	44918	44606	40761	39427
CAW-22-18-091	Whole_sponge_WS2-3	sponge water	30	161284	137644	77280	77034	72444	66089
CAW-22-18-092	Whole_sponge_WS3-1	sponge water	60	139600	118608	66153	66128	64337	63437
CAW-22-18-093	Whole_sponge_WS3-2	sponge water	60	131705	112115	58594	58378	54917	50438
CAW-22-18-094	Whole_sponge_WS3-3	sponge water	60	96505	82821	44182	44020	42042	40254
CAW-22-18-095	Whole_sponge_WS4-1	sponge water	180	123584	105660	59189	59109	56682	51406
CAW-22-18-096	Plate_1_Negative_Control	seq negative	0	677	531	21	20	14	14
CAW-22-18-097	Whole_sponge_WS4-2	sponge water	180	165284	140964	79038	78780	75731	71761
CAW-22-18-098	Whole_sponge_WS4-3	sponge water	180	144288	123801	68017	67805	64953	59490
CAW-22-18-099	Whole_sponge_WS5-1	sponge water	360	115615	98831	55379	55192	53329	50504
CAW-22-18-100	Whole_sponge_WS5-2	sponge water	360	166943	142827	82593	82152	79026	74817
CAW-22-18-101	Whole_sponge_WS5-3	sponge water	360	137137	117279	72385	72161	68413	61869
CAW-22-18-102	Whole_sponge_WS6-1	sponge water	720	152304	129927	73457	73230	68709	57436
CAW-22-18-103	Whole_sponge_WS6-3	sponge water	720	121099	103505	58800	58625	55734	47616
CAW-22-18-104	Extraction_blanks_combined_1_2_3	extraction blank	0	216654	203863	11271	11236	11109	11083
CAW-22-18-105	Extraction_blanks_combined_4_6	extraction blank	0	122627	109987	36914	36827	33569	33388
CAW-22-18-106	Extraction_blank_5	extraction blank	0	138940	118794	63087	63025	62706	60919
CAW-22-18-107	PCR_Negatives_Combined_Run_1_2_4	PCR negative	0	227431	216328	25156	25038	24996	24911
CAW-22-18-108	Plate2_Negative_Control	seq negative	0	4	4	1	1	1	1
Total				12318746	10475870	5462350	5427152	4957261	4452117
Mean				114062	96999	50577	50251	45901	41223
Fraction retained					0.850401	0.443418	0.44056	0.402416	0.36141
