# Supplementary material for: Investigating passive eDNA samplers and submergence times for marine surveillance
Source: PeerJ. 2025 Mar 6;13:e19043. doi: 10.7717/peerj.19043 (PMC11890302; doi:10.7717/peerj.19043)
Supplement: Supplemental Information 4 [file peerj-13-19043-s004.xlsx]

## Sheet: Taxo_blank_ASVs_in_samples
Table S2: Amplicon sequence variants found in blanks and their relative abundance in the dataset.
Superkingdom	Kingdom	Phylum	Class	Order	Family	Genus	Species	ASV	Mean relative abundance (%) in non-blank samples	Standard deviation
Eukaryota	Metazoa	Chordata	Ascidiacea	Stolidobranchia	Styelidae	Styela	Styela plicata	ceaf7e3374dd2fc2f565a09433c6f79d	25.74	17.0897
Eukaryota	NA	NA	NA	NA	NA	NA	NA	8adae12c30fa57127a9dc8a3608b0448	13.62	9.92696
Eukaryota	Metazoa	Arthropoda	Ostracoda	Podocopida	NA	NA	NA	0ecaad604bdf03d564d83cb412d5b325	11.15	18.9517
Eukaryota	Metazoa	Annelida	Polychaeta	Phyllodocida	Syllidae	Exogone	Exogone heterosetosa	92e21134e2823d8f128fd8855353f951	4.52	6.65001
Eukaryota	Metazoa	Chordata	Ascidiacea	Stolidobranchia	Molgulidae	Molgula	Molgula complanata	58de14af0e5c01e3b5a95c9313de6444	2.57	2.25494
Eukaryota	Metazoa	Arthropoda	Hexanauplia	Calanoida	NA	NA	NA	e339ba218acb7c29b72144336db0e7da	2.03	6.24419
Eukaryota	Metazoa	Arthropoda	Hexanauplia	Cyclopoida	Oithonidae	Oithona	NA	2ca9d90f90594b0f7c7636f542870ba4	1.57	5.25744
Eukaryota	Metazoa	Annelida	Polychaeta	Phyllodocida	NA	NA	NA	806e9f0adc4498208f58646d5e820ea3	1.28	2.21103
Eukaryota	SAR	Ciliophora	Spirotrichea	NA	NA	NA	NA	1422fbae4a761043b0d63f5610c08a96	1.01	1.22919
Eukaryota	Metazoa	Arthropoda	Hexanauplia	Harpacticoida	Tachidiidae	Tachidius	Tachidius triangularis	da1af1e0a9f2459080237155f19e8f88	0.95	5.23981
Eukaryota	NA	NA	NA	NA	NA	NA	NA	d5dfa325d280e2efaf4985fbf284fb0f	0.88	8.46355
Eukaryota	Metazoa	Chordata	Ascidiacea	Stolidobranchia	NA	NA	NA	89a740c47fc8f1a89664c3b28d7b5536	0.76	0.988837
Eukaryota	Metazoa	Annelida	Polychaeta	Phyllodocida	Syllidae	Erinaceusyllis	Erinaceusyllis horrockensis	7cb641bde457ca1c99db264b5ef12988	0.71	4.50333
Eukaryota	SAR	NA	Dinophyceae	Syndiniales	NA	NA	NA	907707612fa46fe164cf71d497b5ff70	0.52	1.00897
Eukaryota	Viridiplantae	Chlorophyta	Trebouxiophyceae	NA	NA	NA	NA	7248254f5436b9ea192a334e3d924136	0.3	0.371648
Eukaryota	Metazoa	Cnidaria	Hydrozoa	Anthoathecata	Bougainvilliidae	Bougainvillia	NA	0fb42a547351681bb048141492108634	0.29	0.313719
Eukaryota	Metazoa	Arthropoda	Hexanauplia	Harpacticoida	Miraciidae	Typhlamphiascus	Typhlamphiascus typhlops	ffa46d7f9f09e57e3b082f01d1bb89e6	0.26	2.06077
Eukaryota	Metazoa	Arthropoda	Hexanauplia	Calanoida	Paracalanidae	Parvocalanus	Parvocalanus crassirostris	df07f9834c580383c40fee5e6544815b	0.25	0.913271
Eukaryota	Metazoa	Arthropoda	Ostracoda	Podocopida	NA	NA	NA	82705dbb94b702ba0690a8b206d6098c	0.18	0.43416
Eukaryota	Metazoa	Chordata	Appendicularia	Copelata	Oikopleuridae	NA	NA	e215eca6bc677833ae7c73ab085eaaea	0.16	0.202499
Eukaryota	Metazoa	NA	NA	NA	NA	NA	NA	4497b2de9d6297542f43dcfe44b0d0a6	0.1	0.296618
Eukaryota	NA	NA	NA	NA	NA	NA	NA	6df77f2023cd04c6ce3e06ff0098487c	0.1	0.199395
Eukaryota	Metazoa	Arthropoda	Hexanauplia	NA	NA	NA	NA	2a1387a0b001aab0e913a1c7e291266d	0.09	0.44923
Eukaryota	Metazoa	Mollusca	Bivalvia	Ostreida	Ostreidae	Crassostrea	Crassostrea gigas	bc8e1d74be629e4f077ce7b93065189f	0.08	0.14517
Eukaryota	SAR	Ciliophora	Litostomatea	Cyclotrichida	Mesodiniidae	NA	NA	352e6ab9738e53b1ccf3664444081a96	0.07	0.118497
Eukaryota	Viridiplantae	Streptophyta	Magnoliopsida	Cucurbitales	NA	NA	NA	b93d2b8827ab90042dc9c8420a82e523	0.07	0.355136
Eukaryota	Fungi	Ascomycota	Dothideomycetes	Cladosporiales	Cladosporiaceae	Cladosporium	NA	b4b2148a2fef05e96755705042a9116a	0.06	0.264667
Eukaryota	Viridiplantae	Streptophyta	Magnoliopsida	Asparagales	Amaryllidaceae	Allium	Allium sativum	c2c29948c467f365cde8b0d7a7051b92	0.06	0.415919
Eukaryota	Fungi	Ascomycota	Dothideomycetes	Cladosporiales	Cladosporiaceae	NA	NA	778922a1a030ff430706f213a00287ae	0.05	0.454491
Eukaryota	Metazoa	Annelida	Polychaeta	Phyllodocida	Syllidae	Erinaceusyllis	Erinaceusyllis horrockensis	de4363f7c81341299df311e7388d1f11	0.05	0.154678
Eukaryota	NA	NA	Cryptophyceae	Cryptomonadales	Hemiselmidaceae	Hemiselmis	Hemiselmis cryptochromatica	bd6e0ce45917a7ec2b84c890c1ff3e8a	0.04	0.0880244
Eukaryota	NA	NA	NA	NA	NA	NA	NA	3cf0ed7563396ff1b4ba41093884513a	0.03	0.0548255
Eukaryota	Fungi	Ascomycota	Eurotiomycetes	Eurotiales	Aspergillaceae	NA	NA	1bcd0c6a214e57c54b514a577e56058e	0.02	0.0588298
Eukaryota	Fungi	NA	NA	NA	NA	NA	NA	1cca5da987f467f71e919a52a0c4e884	0.02	0.0533601
Eukaryota	Metazoa	Arthropoda	Hexanauplia	Calanoida	Centropagidae	Centropages	Centropages typicus	5efbf41a63ec7b93832977d79b59c00f	0.02	0.111116
Eukaryota	Metazoa	Arthropoda	Hexanauplia	Calanoida	Temoridae	Temora	Temora turbinata	e4d548a084ab7cd65a6a75ac455c303e	0.02	0.222248
Eukaryota	Metazoa	Arthropoda	Hexanauplia	Cyclopoida	NA	NA	NA	959e6c9aa47e63802d53907129a8aa5e	0.02	0.0751293
Eukaryota	SAR	NA	Dinophyceae	Gonyaulacales	Ceratiaceae	Neoceratium	NA	14e7248da0752157867076b2a46d68e7	0.02	0.147004
Eukaryota	Fungi	Ascomycota	Dothideomycetes	Pleosporales	Pleosporaceae	Alternaria	NA	23bc2610de9899967b757198e654b882	0.01	0.0500785
Eukaryota	Fungi	Ascomycota	Dothideomycetes	Pleosporales	NA	NA	NA	97886e6d503d9f62d36b0f34ca641f86	0.01	0.0236277
Eukaryota	Metazoa	Arthropoda	Hexanauplia	Cyclopoida	Oithonidae	Oithona	NA	acb4e7b4bbe1c7a18fb6e796433f1e0d	0.01	0.0937737
Eukaryota	Metazoa	Chordata	Mammalia	NA	NA	NA	NA	b085816f8ee9ab88a6d9dd947e4cee6d	0.01	0.0534765
Eukaryota	SAR	NA	NA	NA	NA	NA	NA	0ce4eadb9062ca0a790ab73eba10eede	0.01	0.0717054
Unknown	SAR	NA	NA	NA	NA	NA	NA	8e82ba98233e0cfb1cd91126e926f82f	0.01	0.023883
Eukaryota	Fungi	Ascomycota	Dothideomycetes	Mycosphaerellales	Teratosphaeriaceae	Capnobotryella	NA	13d00bcefd794fa239d326bb309087b9	0	0.0415122
Eukaryota	Fungi	Ascomycota	Eurotiomycetes	Eurotiales	Aspergillaceae	Penicillium	NA	f9d5a40e7510b9283597cc895dacf3cd	0	0.0139228
Eukaryota	Fungi	Ascomycota	Eurotiomycetes	Eurotiales	Aspergillaceae	NA	NA	da79211f8fad1f0f7321e05edcc7bca4	0	0.00952308
Eukaryota	Fungi	Ascomycota	Saccharomycetes	Saccharomycetales	Debaryomycetaceae	NA	NA	f9968282c1c7ec2a711032ffb1b8d4de	0	0.00209832
Eukaryota	Fungi	Ascomycota	Saccharomycetes	Saccharomycetales	Dipodascaceae	Yarrowia	Yarrowia lipolytica	e2870c969d7c4fef32b53911b313a313	0	0.0012667
Eukaryota	Fungi	Basidiomycota	Malasseziomycetes	Malasseziales	Malasseziaceae	Malassezia	NA	ebf2b85e5334456a5f4eb8ec6f6cf237	0	0.00277826
Eukaryota	Fungi	Mucoromycota	Mucoromycetes	Mucorales	Rhizopodaceae	Rhizopus	NA	a97aa6bf4cea64b3cf186552180d5ec6	0	0.00607937
Eukaryota	Fungi	NA	NA	NA	NA	NA	NA	266e619e2c6e186d3ac2f6cb3effc936	0	0.010348
Eukaryota	Metazoa	Arthropoda	Hexanauplia	Calanoida	Pseudodiaptomidae	Pseudodiaptomus	Pseudodiaptomus nihonkaiensis	0c335a001429bb635fd08d45c42c0332	0	0.00730688
Eukaryota	Metazoa	Chordata	Ascidiacea	Stolidobranchia	Styelidae	Styela	Styela plicata	1a37563aa7947c38ecd06a8618dc13f8	0	0.0297579
Eukaryota	Metazoa	Chordata	Ascidiacea	Stolidobranchia	Styelidae	Styela	Styela plicata	f521513e66d10cd6617d7a15f99bbe2e	0	0.0432177
Eukaryota	Metazoa	Porifera	Demospongiae	Dendroceratida	Halisarcidae	Halisarca	Halisarca restingaensis	369a7cf4244f0dab3f3a2eefd218f723	0	0.0179159
Eukaryota	Metazoa	NA	NA	NA	NA	NA	NA	8187bf368184c1f01f24ded33c776158	0	0.00316406
Eukaryota	Metazoa	NA	NA	NA	NA	NA	NA	822ec711c31a9ad4ad24102cf37f1c06	0	0.000904545
Eukaryota	Viridiplantae	Chlorophyta	Trebouxiophyceae	NA	NA	NA	NA	3b91264ac64a9d414b10d1163d59be66	0	0.00634731
Eukaryota	Viridiplantae	Streptophyta	Magnoliopsida	Lamiales	Plantaginaceae	Plantago	Plantago lanceolata	94c6e254240d1f48e1f3f31bdff9c75d	0	0.00899458
Eukaryota	Viridiplantae	Streptophyta	Magnoliopsida	Poales	Poaceae	Oryza	Oryza sativa	0c477e589d6e3d2570069229c3e8aa1d	0	0.0220436
Eukaryota	Viridiplantae	Streptophyta	Magnoliopsida	Poales	NA	NA	NA	8994440314a0b1001ed7cf537ee31664	0	0.0209415
Eukaryota	Viridiplantae	Streptophyta	Magnoliopsida	Solanales	NA	NA	NA	5c086405f09272a33224ad2540f93c8d	0	0.00754848
Eukaryota	NA	NA	NA	NA	NA	NA	NA	1e9dacc717d2412abf736f7233e21928	0	0.00540534
Eukaryota	NA	NA	NA	NA	NA	NA	NA	3211a6f86c137fd342c44b78cb72b862	0	0.00520101
Eukaryota	NA	NA	NA	NA	NA	NA	NA	5a4fb05142acc781ac5fa62ea4978c2d	0	0.0130482
Eukaryota	NA	NA	NA	NA	NA	NA	NA	a908e95e03f73c4969289bcc4a63526f	0	0.0404147
Eukaryota	NA	NA	NA	NA	NA	NA	NA	cab5a0c0879a1f9fe252537ca65bcf08	0	0.00794226
Eukaryota	NA	NA	NA	NA	NA	NA	NA	f0801be01c937b21df461ff0f4a5769a	0	0.0121947
Unknown	NA	NA	NA	NA	NA	NA	NA	05a0bd2fcc6c1b888a987d0aea8340a2	0	0.0254495
Unknown	NA	NA	NA	NA	NA	NA	NA	834c89c836edf59d4cb671b8d6570b9b	0	0.00603572
Unknown	NA	NA	NA	NA	NA	NA	NA	ca3ecc49e9df7c525d80b99ab14fcc1e	0	0.0207773
