# Supplementary material for: Investigating passive eDNA samplers and submergence times for marine surveillance
Source: PeerJ. 2025 Mar 6;13:e19043. doi: 10.7717/peerj.19043 (PMC11890302; doi:10.7717/peerj.19043)
Supplement: Supplemental Information 6 [file peerj-13-19043-s006.xlsx]

## Sheet: Taxo_blank_ASVs_in_samples
Table S4: Pairwise dissimilarity between active filtration samples at the beginning (time 0) and end (time 720) of the experiment.
Group	Bray distance	Comparison
0-720	0.664099	between-groups
0-720	0.613816	between-groups
0-720	0.614124	between-groups
0-720	0.678891	between-groups
0-720	0.577247	between-groups
0-720	0.5736	between-groups
0-720	0.704777	between-groups
0-720	0.599486	between-groups
0-720	0.632512	between-groups
0-720	0.664099	between-groups
0-720	0.678891	between-groups
0-720	0.704777	between-groups
0-720	0.613816	between-groups
0-720	0.577247	between-groups
0-720	0.599486	between-groups
0-720	0.614124	between-groups
0-720	0.5736	between-groups
0-720	0.632512	between-groups
Mean	0.628728
