# Supplementary material for: Investigating passive eDNA samplers and submergence times for marine surveillance
Source: PeerJ. 2025 Mar 6;13:e19043. doi: 10.7717/peerj.19043 (PMC11890302; doi:10.7717/peerj.19043)
Supplement: Supplemental Information 7 [file peerj-13-19043-s007.xlsx]

## Sheet: Marsden cove Sabella
Well	Sample	Target	Conc(copies/µL)	Status	Experiment	SampleType	TargetType	Supermix	DyeName(s)	Copies/20µLWell	TotalConfMax	TotalConfMin	PoissonConfMax	PoissonConfMin	Accepted Droplets	Positives	Negatives	Ch1+Ch2+	Ch1+Ch2-	Ch1-Ch2+	Ch1-Ch2-	Linkage	CNV	TotalCNVMax	TotalCNVMin	PoissonCNVMax	PoissonCNVMin	ReferenceCopies	UnknownCopies	Threshold1	Threshold2	Threshold3	ReferenceUsed	Ratio	TotalRatioMax	TotalRatioMin	PoissonRatioMax	PoissonRatioMin	Fractional Abundance	TotalFractionalAbundanceMax	TotalFractionalAbundanceMin	PoissonFractionalAbundanceMax	PoissonFractionalAbundanceMin	MeanAmplitudeOfPositives	MeanAmplitudeOfNegatives	MeanAmplitudeTotal	ExperimentComments	MergedWells	TotalConfidenceMax68
A01	S3.1a	Sabella	0	Manual	DQ	Unknown	Unknown	ddPCR Supermix for Probes (no dUTP)	FAM	0			0.175075	0	20134	0	20134	0	0	0	0									14700														0	6834.55	6834.55
B01	S3.1b	Sabella	0	Manual	DQ	Unknown	Unknown	ddPCR Supermix for Probes (no dUTP)	FAM	0			0.168707	0	20894	0	20894	0	0	0	0									14700														0	6889.98	6889.98
C01	S3.2a	Sabella	0.0567316	Manual	DQ	Unknown	Unknown	ddPCR Supermix for Probes (no dUTP)	FAM	1.13463			0.270975	0.00238267	20738	1	20737	0	0	0	0									14700														17125.1	6986.32	6986.81
D01	S3.2b	Sabella	0	Manual	DQ	Unknown	Unknown	ddPCR Supermix for Probes (no dUTP)	FAM	0			0.165219	0	21335	0	21335	0	0	0	0									14700														0	6972.38	6972.38
E01	S3.3a	Sabella	0.340447	Manual	DQ	Unknown	Unknown	ddPCR Supermix for Probes (no dUTP)	FAM	6.80894			0.695978	0.13333	20737	6	20731	0	0	0	0									14700														16905.7	7032.43	7035.28
F01	S3.3b	Sabella	0	Manual	DQ	Unknown	Unknown	ddPCR Supermix for Probes (no dUTP)	FAM	0			0.161428	0	21836	0	21836	0	0	0	0									14700														0	7093.65	7093.65
G01	M3.1a	Sabella	0.336519	Manual	DQ	Unknown	Unknown	ddPCR Supermix for Probes (no dUTP)	FAM	6.73038			0.687948	0.131792	20979	6	20973	0	0	0	0									14700														16279.1	6951.19	6953.86
H01	NTC	Sabella	0	Manual	DQ	Unknown	Unknown	ddPCR Supermix for Probes (no dUTP)	FAM	0			0.162126	0	21742	0	21742	0	0	0	0									14700														0	6855.31	6855.31
A02	M3.1b	Sabella	0	Manual	DQ	Unknown	Unknown	ddPCR Supermix for Probes (no dUTP)	FAM	0			0.37336	0	9442	0	9442	0	0	0	0									14700														0	6067.6	6067.6
B02	M3.2a	Sabella	0.471697	Manual	DQ	Unknown	Unknown	ddPCR Supermix for Probes (no dUTP)	FAM	9.43394			0.883348	0.213537	19957	8	19949	0	0	0	0									14700														16980.6	7109.84	7113.79
C02	M3.2b	Sabella	0.297457	Manual	DQ	Unknown	Unknown	ddPCR Supermix for Probes (no dUTP)	FAM	5.94913			0.646469	0.104577	19778	5	19773	0	0	0	0									14700														16830.3	6985.91	6988.4
D02	M3.3a	Sabella	0.060176	Manual	DQ	Unknown	Unknown	ddPCR Supermix for Probes (no dUTP)	FAM	1.20352			0.287428	0.00252733	19551	1	19550	0	0	0	0									14700														16988	7030.59	7031.1
E02	M3.3b	Sabella	0.223568	Manual	DQ	Unknown	Unknown	ddPCR Supermix for Probes (no dUTP)	FAM	4.47136			0.527185	0.0674572	21051	4	21047	0	0	0	0									14700														15629.3	6900.9	6902.56
F02	Blank 2	Sabella	0	Manual	DQ	Unknown	Unknown	ddPCR Supermix for Probes (no dUTP)	FAM	0			0.170982	0	20616	0	20616	0	0	0	0									14700														0	6964.62	6964.62
G02	N3.1a	Sabella	0	Manual	DQ	Unknown	Unknown	ddPCR Supermix for Probes (no dUTP)	FAM	0			0.174133	0	20243	0	20243	0	0	0	0									14700														0	6987.33	6987.33
H02	NTC	Sabella	0	Manual	DQ	Unknown	Unknown	ddPCR Supermix for Probes (no dUTP)	FAM	0			0.167075	0	21098	0	21098	0	0	0	0									14700														0	7315.89	7315.89
A03	N3.1b	Sabella	0	Manual	DQ	Unknown	Unknown	ddPCR Supermix for Probes (no dUTP)	FAM	0			0.166657	0	21151	0	21151	0	0	0	0									14700														0	6897	6897
B03	N3.2a	Sabella	0.0547208	Manual	DQ	Unknown	Unknown	ddPCR Supermix for Probes (no dUTP)	FAM	1.09442			0.26137	0.00229822	21500	1	21499	0	0	0	0									14700														16513.5	6959.98	6960.43
C03	N3.2b	Sabella	0.22843	Manual	DQ	Unknown	Unknown	ddPCR Supermix for Probes (no dUTP)	FAM	4.5686			0.538651	0.068924	20603	4	20599	0	0	0	0									14700														16372.2	6957.44	6959.27
D03	N3.3a	Sabella	0.229499	Manual	DQ	Unknown	Unknown	ddPCR Supermix for Probes (no dUTP)	FAM	4.58999			0.541174	0.0692467	20507	4	20503	0	0	0	0									14700														16335.9	7013.76	7015.58
E03	N3.3b	Sabella	0.174762	Manual	DQ	Unknown	Unknown	ddPCR Supermix for Probes (no dUTP)	FAM	3.49525			0.463235	0.0414746	20197	3	20194	0	0	0	0									14700														16461.5	7037.2	7038.6
F03	D3.1a	Sabella	1.90404	Manual	DQ	Unknown	Unknown	ddPCR Supermix for Probes (no dUTP)	FAM	38.0807			2.62047	1.33205	21025	34	20991	0	0	0	0									14700														16494.5	6999.22	7014.58
G03	D3.1b	Sabella	2.27367	Manual	DQ	Unknown	Unknown	ddPCR Supermix for Probes (no dUTP)	FAM	45.4735			3.01574	1.66488	22789	44	22745	0	0	0	0									14700														16188.4	6915.1	6933.01
H03	NTC	Sabella	0	Manual	DQ	Unknown	Unknown	ddPCR Supermix for Probes (no dUTP)	FAM	0			0.158375	0	22257	0	22257	0	0	0	0									14700														0	6810.72	6810.72
A04	D3.2a	Sabella	0.646472	Manual	DQ	Unknown	Unknown	ddPCR Supermix for Probes (no dUTP)	FAM	12.9294			1.08805	0.344471	21844	12	21832	0	0	0	0									14700														16377.6	6934.25	6939.44
B04	D3.2b	Sabella	0.537679	Manual	DQ	Unknown	Unknown	ddPCR Supermix for Probes (no dUTP)	FAM	10.7536			0.974215	0.256382	19697	9	19688	0	0	0	0									14700														16484.7	7028.47	7032.79
C04	S4.1a	Sabella	0.118447	Manual	DQ	Unknown	Unknown	ddPCR Supermix for Probes (no dUTP)	FAM	2.36893			0.379426	0.0179439	19866	2	19864	0	0	0	0									14700														15844.6	7111.64	7112.52
D04	S4.1b	Sabella	0.241315	Manual	DQ	Unknown	Unknown	ddPCR Supermix for Probes (no dUTP)	FAM	4.8263			0.569039	0.0728116	19503	4	19499	0	0	0	0									14700														16944.2	7124.31	7126.32
E04	S4.2a	Sabella	0.0571282	Manual	DQ	Unknown	Unknown	ddPCR Supermix for Probes (no dUTP)	FAM	1.14256			0.27287	0.00239933	20594	1	20593	0	0	0	0									14700														16729	7131.61	7132.07
F04	S4.2b	Sabella	0.113746	Manual	DQ	Unknown	Unknown	ddPCR Supermix for Probes (no dUTP)	FAM	2.27491			0.364366	0.0172317	20687	2	20685	0	0	0	0									14700														16748.7	7099.38	7100.31
G04	S4.3a	Sabella	0	Manual	DQ	Unknown	Unknown	ddPCR Supermix for Probes (no dUTP)	FAM	0			0.159212	0	22140	0	22140	0	0	0	0									14700														0	7177.38	7177.38
H04	NTC	Sabella	0	Manual	DQ	Unknown	Unknown	ddPCR Supermix for Probes (no dUTP)	FAM	0			0.153686	0	22936	0	22936	0	0	0	0									14700														0	6990.03	6990.03
A05	S4.3b	Sabella	0	Manual	DQ	Unknown	Unknown	ddPCR Supermix for Probes (no dUTP)	FAM	0			0.178896	0	19704	0	19704	0	0	0	0									14700														0	7188.89	7188.89
B05	M4.1a	Sabella	0.53305	Manual	DQ	Unknown	Unknown	ddPCR Supermix for Probes (no dUTP)	FAM	10.661			0.965827	0.254175	19868	9	19859	0	0	0	0									14700														16442.7	7222.44	7226.61
C05	M4.1b	Sabella	0.407799	Manual	DQ	Unknown	Unknown	ddPCR Supermix for Probes (no dUTP)	FAM	8.15598			0.79429	0.173239	20198	7	20191	0	0	0	0									14700														16825.5	7291.95	7295.25
D05	M4.2a	Sabella	0.522837	Manual	DQ	Unknown	Unknown	ddPCR Supermix for Probes (no dUTP)	FAM	10.4567			0.947319	0.249306	20256	9	20247	0	0	0	0									14700														18179.4	7222.89	7227.76
E05	M4.2b	Sabella	0.550937	Manual	DQ	Unknown	Unknown	ddPCR Supermix for Probes (no dUTP)	FAM	11.0187			0.970593	0.274279	21359	10	21349	0	0	0	0									14700														17050.3	7159.23	7163.86
F05	M4.3a	Sabella	1.43445	Manual	DQ	Unknown	Unknown	ddPCR Supermix for Probes (no dUTP)	FAM	28.689			2.06147	0.949797	21337	26	21311	0	0	0	0									14700														16744.8	7212.74	7224.36
G05	M4.3b	Sabella	0.873158	Manual	DQ	Unknown	Unknown	ddPCR Supermix for Probes (no dUTP)	FAM	17.4632			1.37694	0.5105	21566	16	21550	0	0	0	0									14700														16775	7243.73	7250.81
H05	NTC	Sabella	0	Manual	DQ	Unknown	Unknown	ddPCR Supermix for Probes (no dUTP)	FAM	0			0.167767	0	21011	0	21011	0	0	0	0									14700														0	7208.3	7208.3
A06	N4.1a	Sabella	0	Manual	DQ	Unknown	Unknown	ddPCR Supermix for Probes (no dUTP)	FAM	0			0.172059	0	20487	0	20487	0	0	0	0									14700														0	7254	7254
B06	N4.1b	Sabella	0.0610187	Manual	DQ	Unknown	Unknown	ddPCR Supermix for Probes (no dUTP)	FAM	1.22037			0.291454	0.00256272	19281	1	19280	0	0	0	0									14700														17005.3	7247.69	7248.2
C06	N4.2a	Sabella	0	Manual	DQ	Unknown	Unknown	ddPCR Supermix for Probes (no dUTP)	FAM	0			0.174746	0	20172	0	20172	0	0	0	0									14700														0	7202.44	7202.44
D06	N4.2b	Sabella	0.10914	Manual	DQ	Unknown	Unknown	ddPCR Supermix for Probes (no dUTP)	FAM	2.18279			0.34961	0.016534	21560	2	21558	0	0	0	0									14700														16678.8	7236.78	7237.66
E06	N4.3a	Sabella	0.333735	Manual	DQ	Unknown	Unknown	ddPCR Supermix for Probes (no dUTP)	FAM	6.6747			0.682255	0.130701	21154	6	21148	0	0	0	0									14700														16809.1	7252.53	7255.24
F06	N4.3b	Sabella	0.553529	Manual	DQ	Unknown	Unknown	ddPCR Supermix for Probes (no dUTP)	FAM	11.0706			0.975161	0.27557	21259	10	21249	0	0	0	0									14700														16823.2	7312.6	7317.08
G06	D4.1a	Sabella	0.124435	Manual	DQ	Unknown	Unknown	ddPCR Supermix for Probes (no dUTP)	FAM	2.4887			0.398612	0.0188511	18910	2	18908	0	0	0	0									14700														16167.3	7270.78	7271.72
H06	NTC	Sabella	0	Manual	DQ	Unknown	Unknown	ddPCR Supermix for Probes (no dUTP)	FAM	0			0.165429	0	21308	0	21308	0	0	0	0									14700														0	7352.29	7352.29
A07	D4.1b	Sabella	0	Manual	DQ	Unknown	Unknown	ddPCR Supermix for Probes (no dUTP)	FAM	0			0.173123	0	20361	0	20361	0	0	0	0									14700														0	7071.3	7071.3
B07	D4.2a	Sabella	0.447242	Manual	DQ	Unknown	Unknown	ddPCR Supermix for Probes (no dUTP)	FAM	8.94484			0.837544	0.202468	21048	8	21040	0	0	0	0									14700														16312.1	7084.08	7087.58
C07	D4.2b	Sabella	0.827169	Manual	DQ	Unknown	Unknown	ddPCR Supermix for Probes (no dUTP)	FAM	16.5434			1.34303	0.464207	19919	14	19905	0	0	0	0									14700														16510	7212.21	7218.74
D07	D4.3a	Sabella	0	Manual	DQ	Unknown	Unknown	ddPCR Supermix for Probes (no dUTP)	FAM	0			0.172454	0	20440	0	20440	0	0	0	0									14700														0	7245.11	7245.11
E07	D4.3b	Sabella	0.0579642	Manual	DQ	Unknown	Unknown	ddPCR Supermix for Probes (no dUTP)	FAM	1.15928			0.276863	0.00243444	20297	1	20296	0	0	0	0									14700														16491.9	7320.65	7321.11
F07	Positive	Sabella	1000000	Manual	DQ	Unknown	Unknown	ddPCR Supermix for Probes (no dUTP)	FAM	20000000			1000000	10305.5	19091	19091	0	0	0	0	0									14700														17209.9	0	17209.9
G07	Positive 1:10	Sabella	1000000	Manual	DQ	Unknown	Unknown	ddPCR Supermix for Probes (no dUTP)	FAM	20000000			1000000	10343.4	19715	19715	0	0	0	0	0									14700														16912.5	0	16912.5
H07	Positive 1:100	Sabella	2608.09	Manual	DQ	Unknown	Unknown	ddPCR Supermix for Probes (no dUTP)	FAM	52161.8			2654.65	2563.3	20863	18590	2273	0	0	0	0									14700														16696.5	7326.34	15675.6
A01	N5.3a	Sabella	0	Manual	DQ	Unknown	Unknown	ddPCR Supermix for Probes (no dUTP)	FAM	0			0.172404	0	20446	0	20446	0	0	0	0									14700														0	7250.54	7250.54
B01	N5.3b	Sabella	0.119245	Manual	DQ	Unknown	Unknown	ddPCR Supermix for Probes (no dUTP)	FAM	2.3849			0.381984	0.0180648	19733	2	19731	0	0	0	0									14700														17528.8	7202.74	7203.79
C01	D5.1a	Sabella	0.463177	Manual	DQ	Unknown	Unknown	ddPCR Supermix for Probes (no dUTP)	FAM	9.26355			0.867391	0.209681	20324	8	20316	0	0	0	0									14700														17955.3	7387.48	7391.64
D01	D5.1b	Sabella	0	Manual	DQ	Unknown	Unknown	ddPCR Supermix for Probes (no dUTP)	FAM	0			0.170025	0	20732	0	20732	0	0	0	0									14700														0	7397.14	7397.14
E01	D5.2a	Sabella	0.0586783	Manual	DQ	Unknown	Unknown	ddPCR Supermix for Probes (no dUTP)	FAM	1.17357			0.280274	0.00246443	20050	1	20049	0	0	0	0									14700														17975.2	7384.72	7385.24
F01	D5.2b	Sabella	0.28891	Manual	DQ	Unknown	Unknown	ddPCR Supermix for Probes (no dUTP)	FAM	5.7782			0.627892	0.101573	20363	5	20358	0	0	0	0									14700														18125.3	7494.21	7496.82
G01	D5.3a	Sabella	0.171551	Manual	DQ	Unknown	Unknown	ddPCR Supermix for Probes (no dUTP)	FAM	3.43103			0.454723	0.0407126	20575	3	20572	0	0	0	0									14700														17839.5	7313.48	7315.01
H01	D5.3b	Sabella	0.113351	Manual	DQ	Unknown	Unknown	ddPCR Supermix for Probes (no dUTP)	FAM	2.26702			0.363102	0.017172	20759	2	20757	0	0	0	0									14700														16704.4	7428.84	7429.73
A02	N6.1a	Sabella	0.281864	Manual	DQ	Unknown	Unknown	ddPCR Supermix for Probes (no dUTP)	FAM	5.63727			0.612576	0.0990956	20872	5	20867	0	0	0	0									14700														17502.5	7565	7567.38
B02	N6.1b	Sabella	0.630124	Manual	DQ	Unknown	Unknown	ddPCR Supermix for Probes (no dUTP)	FAM	12.6025			1.08351	0.325331	20543	11	20532	0	0	0	0									14700														18118.3	7519.23	7524.9
C02	N6.2a	Sabella	0.81149	Manual	DQ	Unknown	Unknown	ddPCR Supermix for Probes (no dUTP)	FAM	16.2298			1.29757	0.465348	21754	15	21739	0	0	0	0									14700														18203	7466.24	7473.65
D02	N6.2b	Sabella	0.497345	Manual	DQ	Unknown	Unknown	ddPCR Supermix for Probes (no dUTP)	FAM	9.94691			0.901124	0.237152	21294	9	21285	0	0	0	0									14700														17700.5	7441.72	7446.06
E02	N6.3a	Sabella	0.489301	Manual	DQ	Unknown	Unknown	ddPCR Supermix for Probes (no dUTP)	FAM	9.78603			0.886546	0.233317	21644	9	21635	0	0	0	0									14700														17623.3	7409.1	7413.35
F02	N6.3b	Sabella	0.532846	Manual	DQ	Unknown	Unknown	ddPCR Supermix for Probes (no dUTP)	FAM	10.6569			0.938717	0.265274	22084	10	22074	0	0	0	0									14700														17911.4	7535.07	7539.77
G02	D6.1a	Sabella	1.12887	Manual	DQ	Unknown	Unknown	ddPCR Supermix for Probes (no dUTP)	FAM	22.5774			1.6858	0.710739	21896	21	21875	0	0	0	0									14700														17536.2	7449.39	7459.06
H02	D6.1b	Sabella	2.01393	Manual	DQ	Unknown	Unknown	ddPCR Supermix for Probes (no dUTP)	FAM	40.2786			2.74814	1.42405	21048	36	21012	0	0	0	0									14700														17762.9	7461.42	7479.04
A03	D6.2a	Sabella	1.45161	Manual	DQ	Unknown	Unknown	ddPCR Supermix for Probes (no dUTP)	FAM	29.0321			2.08613	0.961154	21085	26	21059	0	0	0	0									14700														18222.9	7712.51	7725.47
B03	D6.2b	Sabella	1.46127	Manual	DQ	Unknown	Unknown	ddPCR Supermix for Probes (no dUTP)	FAM	29.2255			2.11429	0.959092	20140	25	20115	0	0	0	0									14700														17660.8	7496.65	7509.26
C03	D6.3a	Sabella	1.89036	Manual	DQ	Unknown	Unknown	ddPCR Supermix for Probes (no dUTP)	FAM	37.8072			2.60164	1.32249	21177	34	21143	0	0	0	0									14700														17981	7655.25	7671.82
D03	D6.3b	Sabella	1.7672	Manual	DQ	Unknown	Unknown	ddPCR Supermix for Probes (no dUTP)	FAM	35.344			2.46718	1.21429	20653	31	20622	0	0	0	0									14700														17679.8	7565.96	7581.14
E03	(A12 1.1) A02.1a	Sabella	0.924962	Manual	DQ	Unknown	Unknown	ddPCR Supermix for Probes (no dUTP)	FAM	18.4992			1.44021	0.550374	21631	17	21614	0	0	0	0									14700														17705.5	7457.11	7465.17
F03	(A12 1.1) A02.1b	Sabella	0.560144	Manual	DQ	Unknown	Unknown	ddPCR Supermix for Probes (no dUTP)	FAM	11.2029			0.986817	0.278862	21008	10	20998	0	0	0	0									14700														17669.4	7574.93	7579.74
G03	(A12 1.2) A02.2a	Sabella	0.825034	Manual	DQ	Unknown	Unknown	ddPCR Supermix for Probes (no dUTP)	FAM	16.5007			1.31923	0.473114	21397	15	21382	0	0	0	0									14700														17481.9	7401.92	7408.99
H03	(A12 1.2) A02.2b	Sabella	0.723109	Manual	DQ	Unknown	Unknown	ddPCR Supermix for Probes (no dUTP)	FAM	14.4622			1.1942	0.396042	21157	13	21144	0	0	0	0									14700														17707.7	7464.05	7470.34
A04	(A12 1.3) A02.3a	Sabella	0.919308	Manual	DQ	Unknown	Unknown	ddPCR Supermix for Probes (no dUTP)	FAM	18.3862			1.4314	0.54701	21764	17	21747	0	0	0	0									14700														17944.7	7664.53	7672.56
B04	(A12 1.3) A02.3b	Sabella	1.31174	Manual	DQ	Unknown	Unknown	ddPCR Supermix for Probes (no dUTP)	FAM	26.2349			1.91164	0.852905	21537	24	21513	0	0	0	0									14700														17934.7	7635.2	7646.68
C04	Blank Da	Sabella	0	Manual	DQ	Unknown	Unknown	ddPCR Supermix for Probes (no dUTP)	FAM	0			0.165958	0	21240	0	21240	0	0	0	0									14700														0	7632.96	7632.96
D04	Blank Db	Sabella	0	Manual	DQ	Unknown	Unknown	ddPCR Supermix for Probes (no dUTP)	FAM	0			0.16247	0	21696	0	21696	0	0	0	0									14700														0	7526.24	7526.24
E04	Blank Ma	Sabella	0	Manual	DQ	Unknown	Unknown	ddPCR Supermix for Probes (no dUTP)	FAM	0			0.165888	0	21249	0	21249	0	0	0	0									14700														0	7618.77	7618.77
F04	Blank Mb	Sabella	0	Manual	DQ	Unknown	Unknown	ddPCR Supermix for Probes (no dUTP)	FAM	0			0.167155	0	21088	0	21088	0	0	0	0									14700														0	7519.23	7519.23
G04	Blank Na	Sabella	0	Manual	DQ	Unknown	Unknown	ddPCR Supermix for Probes (no dUTP)	FAM	0			0.161561	0	21818	0	21818	0	0	0	0									14700														0	7676.52	7676.52
H04	Blank Nb	Sabella	0	Manual	DQ	Unknown	Unknown	ddPCR Supermix for Probes (no dUTP)	FAM	0			0.172185	0	20472	0	20472	0	0	0	0									14700														0	7594.15	7594.15
A05	Blank 5	Sabella	0	Manual	DQ	Unknown	Unknown	ddPCR Supermix for Probes (no dUTP)	FAM	0			0.170009	0	20734	0	20734	0	0	0	0									14700														0	7552.08	7552.08
B05	Blank 6	Sabella	0	Manual	DQ	Unknown	Unknown	ddPCR Supermix for Probes (no dUTP)	FAM	0			0.164333	0	21450	0	21450	0	0	0	0									14700														0	7496.81	7496.81
C05	M6.1a	Sabella	8.24277	Manual	DQ	Unknown	Unknown	ddPCR Supermix for Probes (no dUTP)	FAM	164.855			9.56705	6.91997	21341	149	21192	0	0	0	0									14700														18060.9	7737.32	7809.39
D05	M6.1b	Sabella	19.8259	Manual	DQ	Unknown	Unknown	ddPCR Supermix for Probes (no dUTP)	FAM	396.518			21.9138	17.7417	20765	347	20418	0	0	0	0									14700														18040.2	7732.52	7904.77
E05	M6.2a	Sabella	1.45988	Manual	DQ	Unknown	Unknown	ddPCR Supermix for Probes (no dUTP)	FAM	29.1975			2.08455	0.974672	21772	27	21745	0	0	0	0									14700														17999.9	7643.9	7656.74
F05	M6.2b	Sabella	2.12926	Manual	DQ	Unknown	Unknown	ddPCR Supermix for Probes (no dUTP)	FAM	42.5853			2.86161	1.53422	22121	40	22081	0	0	0	0									14700														17978.8	7694.05	7712.64
G05	M6.3a	Sabella	22.9735	Manual	DQ	Unknown	Unknown	ddPCR Supermix for Probes (no dUTP)	FAM	459.47			25.2022	20.7491	21150	409	20741	0	0	0	0									14700														17834.8	7720.91	7916.49
H05	M6.3b	Sabella	65.9668	Manual	DQ	Unknown	Unknown	ddPCR Supermix for Probes (no dUTP)	FAM	1319.33			69.8301	62.116	20613	1124	19489	0	0	0	0									14700														17670.9	7608.85	8157.52
A06	S6.1a	Sabella	0.320055	Manual	DQ	Unknown	Unknown	ddPCR Supermix for Probes (no dUTP)	FAM	6.40111			0.654286	0.125345	22058	6	22052	0	0	0	0									14700														17700.5	7596.54	7599.29
B06	S6.1b	Sabella	0.492396	Manual	DQ	Unknown	Unknown	ddPCR Supermix for Probes (no dUTP)	FAM	9.84792			0.892154	0.234792	21508	9	21499	0	0	0	0									14700														17645.4	7473.22	7477.48
C06	S6.2a	Sabella	0.22288	Manual	DQ	Unknown	Unknown	ddPCR Supermix for Probes (no dUTP)	FAM	4.45759			0.525562	0.0672495	21116	4	21112	0	0	0	0									14700														17625.1	7597.53	7599.43
D06	S6.2b	Sabella	1.92513	Manual	DQ	Unknown	Unknown	ddPCR Supermix for Probes (no dUTP)	FAM	38.5027			2.62693	1.36128	22018	36	21982	0	0	0	0									14700														17336.6	7441.25	7457.43
E06	S6.3a	Sabella	0.635873	Manual	DQ	Unknown	Unknown	ddPCR Supermix for Probes (no dUTP)	FAM	12.7175			1.07021	0.338824	22208	12	22196	0	0	0	0									14700														17497.7	7563.91	7569.28
F06	S6.3b	Sabella	0.425294	Manual	DQ	Unknown	Unknown	ddPCR Supermix for Probes (no dUTP)	FAM	8.50589			0.796436	0.192533	22134	8	22126	0	0	0	0									14700														17427.7	7561.59	7565.16
G06	(Blank A) Labelled Blank Buffer??a	Sabella	0	Manual	DQ	Unknown	Unknown	ddPCR Supermix for Probes (no dUTP)	FAM	0			0.162612	0	21677	0	21677	0	0	0	0									14700														0	7467.36	7467.36
H06	(Blank A) Labelled Blank Buffer??b	Sabella	0	Manual	DQ	Unknown	Unknown	ddPCR Supermix for Probes (no dUTP)	FAM	0			0.165126	0	21347	0	21347	0	0	0	0									14700														0	7399.47	7399.47
A07	Blank Whole Sponge a	Sabella	0	Manual	DQ	Unknown	Unknown	ddPCR Supermix for Probes (no dUTP)	FAM	0			0.164548	0	21422	0	21422	0	0	0	0									14700														0	7562.87	7562.87
B07	Whole sponge WS1.1a	Sabella	0	Manual	DQ	Unknown	Unknown	ddPCR Supermix for Probes (no dUTP)	FAM	0			0.164756	0	21395	0	21395	0	0	0	0									14700														0	7359.81	7359.81
C07	Whole sponge WS 1.1b	Sabella	0	Manual	DQ	Unknown	Unknown	ddPCR Supermix for Probes (no dUTP)	FAM	0			0.167226	0	21079	0	21079	0	0	0	0									14700														0	7656.05	7656.05
D07	Whole sponge WS1.2a	Sabella	0	Manual	DQ	Unknown	Unknown	ddPCR Supermix for Probes (no dUTP)	FAM	0			0.171857	0	20511	0	20511	0	0	0	0									14700														0	7561.66	7561.66
E07	Whole sponge WS1.2b	Sabella	0	Manual	DQ	Unknown	Unknown	ddPCR Supermix for Probes (no dUTP)	FAM	0			0.16451	0	21427	0	21427	0	0	0	0									14700														0	7628.33	7628.33
F07	Whole sponge WS1.3a	Sabella	0.108042	Manual	DQ	Unknown	Unknown	ddPCR Supermix for Probes (no dUTP)	FAM	2.16084			0.346094	0.0163677	21779	2	21777	0	0	0	0									14700														17178.1	7417.7	7418.6
G07	Whole sponge WS1.3b	Sabella	0	Manual	DQ	Unknown	Unknown	ddPCR Supermix for Probes (no dUTP)	FAM	0			0.163845	0	21514	0	21514	0	0	0	0									14700														0	7836.8	7836.8
H07	NTC	Sabella	0	Manual	DQ	Unknown	Unknown	ddPCR Supermix for Probes (no dUTP)	FAM	0			0.173294	0	20341	0	20341	0	0	0	0									14700														0	6684.66	6684.66
A08	Whole sponge WS2.1	Sabella	0	Manual	DQ	Unknown	Unknown	ddPCR Supermix for Probes (no dUTP)	FAM	0			0.167919	0	20992	0	20992	0	0	0	0									14700														0	7754.13	7754.13
B08	Whole sponge WS2.2	Sabella	0	Manual	DQ	Unknown	Unknown	ddPCR Supermix for Probes (no dUTP)	FAM	0			0.169412	0	20807	0	20807	0	0	0	0									14700														0	7593.42	7593.42
C08	Whole sponge WS2.3	Sabella	0	Manual	DQ	Unknown	Unknown	ddPCR Supermix for Probes (no dUTP)	FAM	0			0.163049	0	21619	0	21619	0	0	0	0									14700														0	7665.51	7665.51
D08	Whole sponge WS3.1	Sabella	0	Manual	DQ	Unknown	Unknown	ddPCR Supermix for Probes (no dUTP)	FAM	0			0.165173	0	21341	0	21341	0	0	0	0									14700														0	7533.52	7533.52
E08	Whole sponge WS3.2	Sabella	0	Manual	DQ	Unknown	Unknown	ddPCR Supermix for Probes (no dUTP)	FAM	0			0.171023	0	20611	0	20611	0	0	0	0									14700														0	7716.09	7716.09
F08	Whole sponge WS3.3	Sabella	0	Manual	DQ	Unknown	Unknown	ddPCR Supermix for Probes (no dUTP)	FAM	0			0.168408	0	20931	0	20931	0	0	0	0									14700														0	7700.35	7700.35
G08	Whole sponge WS4.1	Sabella	0	Manual	DQ	Unknown	Unknown	ddPCR Supermix for Probes (no dUTP)	FAM	0			0.167695	0	21020	0	21020	0	0	0	0									14700														0	7600.73	7600.73
H08	Whole sponge WS4.2	Sabella	0	Manual	DQ	Unknown	Unknown	ddPCR Supermix for Probes (no dUTP)	FAM	0			0.172792	0	20400	0	20400	0	0	0	0									14700														0	7649.67	7649.67
A09	Whole sponge WS4.3	Sabella	0	Manual	DQ	Unknown	Unknown	ddPCR Supermix for Probes (no dUTP)	FAM	0			0.16929	0	20822	0	20822	0	0	0	0									14700														0	7662	7662
B09	Whole sponge WS5.1	Sabella	0	Manual	DQ	Unknown	Unknown	ddPCR Supermix for Probes (no dUTP)	FAM	0			0.168473	0	20923	0	20923	0	0	0	0									14700														0	7693.93	7693.93
C09	Whole sponge WS5.2	Sabella	0	Manual	DQ	Unknown	Unknown	ddPCR Supermix for Probes (no dUTP)	FAM	0			0.175721	0	20060	0	20060	0	0	0	0									14700														0	7493.6	7493.6
D09	Whole sponge WS5.3	Sabella	0	Manual	DQ	Unknown	Unknown	ddPCR Supermix for Probes (no dUTP)	FAM	0			0.168192	0	20958	0	20958	0	0	0	0									14700														0	7453.83	7453.83
E09	Whole sponge WS6.1	Sabella	0.278937	Manual	DQ	Unknown	Unknown	ddPCR Supermix for Probes (no dUTP)	FAM	5.57873			0.606213	0.0980665	21091	5	21086	0	0	0	0									14700														17336.8	7482.19	7484.53
F09	Whole sponge WS6.3	Sabella	0.324872	Manual	DQ	Unknown	Unknown	ddPCR Supermix for Probes (no dUTP)	FAM	6.49744			0.664135	0.127231	21731	6	21725	0	0	0	0									14700														15507.4	6710.41	6712.84
G09	Positive 1:100	Sabella	2290.38	Manual	DQ	Unknown	Unknown	ddPCR Supermix for Probes (no dUTP)	FAM	45807.7			2330.27	2251.8	20760	17797	2963	0	0	0	0									14700														16392.2	7203.38	15080.8
H09	NTC	Sabella	0	Manual	DQ	Unknown	Unknown	ddPCR Supermix for Probes (no dUTP)	FAM	0			0.170899	0	20626	0	20626	0	0	0	0									14700														0	7214.97	7214.97
A01	S5.1a*	Sabella	0.0614297	Manual	DQ	Unknown	Unknown	ddPCR Supermix for Probes (no dUTP)	FAM	1.22859			0.293417	0.00257998	19152	1	19151	0	0	0	0									14700														18484.3	7696.51	7697.08
B01	S5.1b*	Sabella	0.062055	Manual	DQ	Unknown	Unknown	ddPCR Supermix for Probes (no dUTP)	FAM	1.2411			0.296404	0.00260625	18959	1	18958	0	0	0	0									14700														18154.5	7668.98	7669.53
C01	S5.2a	Sabella	0.0657522	Manual	DQ	Unknown	Unknown	ddPCR Supermix for Probes (no dUTP)	FAM	1.31504			0.314065	0.00276152	17893	1	17892	0	0	0	0									14700														18260.3	7748.54	7749.13
D01	S5.2b	Sabella	0	Manual	DQ	Unknown	Unknown	ddPCR Supermix for Probes (no dUTP)	FAM	0			0.182169	0	19350	0	19350	0	0	0	0									14700														0	7813.74	7813.74
E01	S5.3a	Sabella	0.0575333	Manual	DQ	Unknown	Unknown	ddPCR Supermix for Probes (no dUTP)	FAM	1.15067			0.274805	0.00241634	20449	1	20448	0	0	0	0									14700														18605.8	7738.73	7739.26
F01	S5.3b	Sabella	0	Manual	DQ	Unknown	Unknown	ddPCR Supermix for Probes (no dUTP)	FAM	0			0.18233	0	19333	0	19333	0	0	0	0									14700														0	7725.44	7725.44
G01	Blank 3	Sabella	0	Manual	DQ	Unknown	Unknown	ddPCR Supermix for Probes (no dUTP)	FAM	0			0.181223	0	19451	0	19451	0	0	0	0									14700														0	7718.27	7718.27
H01	NTC	Sabella	0	Manual	DQ	Unknown	Unknown	ddPCR Supermix for Probes (no dUTP)	FAM	0			0.162365	0	21710	0	21710	0	0	0	0									14700														0	7849.39	7849.39
A02	Blank 4	Sabella	0	Manual	DQ	Unknown	Unknown	ddPCR Supermix for Probes (no dUTP)	FAM	0			0.171048	0	20608	0	20608	0	0	0	0									14700														0	7709.42	7709.42
B02	M5.1a	Sabella	0.390326	Manual	DQ	Unknown	Unknown	ddPCR Supermix for Probes (no dUTP)	FAM	7.80652			0.760252	0.165817	21102	7	21095	0	0	0	0									14700														17933.9	7820.88	7824.24
C02	M5.1b	Sabella	0.734605	Manual	DQ	Unknown	Unknown	ddPCR Supermix for Probes (no dUTP)	FAM	14.6921			1.23642	0.391426	19224	12	19212	0	0	0	0									14700														18254.7	7864.82	7871.3
D02	M5.3a	Sabella	0.113641	Manual	DQ	Unknown	Unknown	ddPCR Supermix for Probes (no dUTP)	FAM	2.27282			0.364032	0.0172159	20706	2	20704	0	0	0	0									14700														18929.8	7909.57	7910.63
E02	M5.3b	Sabella	0.0586169	Manual	DQ	Unknown	Unknown	ddPCR Supermix for Probes (no dUTP)	FAM	1.17234			0.279981	0.00246185	20071	1	20070	0	0	0	0									14700														18851.4	7930.6	7931.15
F02	N5.1a	Sabella	0.122053	Manual	DQ	Unknown	Unknown	ddPCR Supermix for Probes (no dUTP)	FAM	2.44106			0.390981	0.0184902	19279	2	19277	0	0	0	0									14700														17980.9	7887.14	7888.19
G02	N5.1b	Sabella	0.117942	Manual	DQ	Unknown	Unknown	ddPCR Supermix for Probes (no dUTP)	FAM	2.35884			0.37781	0.0178674	19951	2	19949	0	0	0	0									14700														19042	7883.52	7884.64
H02	NTC	Sabella	0	Manual	DQ	Unknown	Unknown	ddPCR Supermix for Probes (no dUTP)	FAM	0			0.166319	0	21194	0	21194	0	0	0	0									14700														0	7597.62	7597.62
A03	N5.2a	Sabella	0.597314	Manual	DQ	Unknown	Unknown	ddPCR Supermix for Probes (no dUTP)	FAM	11.9463			1.05231	0.297365	19701	10	19691	0	0	0	0									14700														18293.2	7984.51	7989.74
B03	N5.2b	Sabella	0.694847	Manual	DQ	Unknown	Unknown	ddPCR Supermix for Probes (no dUTP)	FAM	13.8969			1.19482	0.358742	18630	11	18619	0	0	0	0									14700														17997.9	8039.67	8045.55
C03	N5.3a	Sabella	0	Manual	DQ	Unknown	Unknown	ddPCR Supermix for Probes (no dUTP)	FAM	0			0.178146	0	19787	0	19787	0	0	0	0									14700														0	7891.18	7891.18
D03	N5.3b	Sabella	0.299136	Manual	DQ	Unknown	Unknown	ddPCR Supermix for Probes (no dUTP)	FAM	5.98271			0.650119	0.105167	19667	5	19662	0	0	0	0									14700														18252.9	7900.83	7903.46
E03	D5.1a	Sabella	0.46533	Manual	DQ	Unknown	Unknown	ddPCR Supermix for Probes (no dUTP)	FAM	9.3066			0.871423	0.210655	20230	8	20222	0	0	0	0									14700														17903	7772.73	7776.74
F03	D5.1b	Sabella	0.057298	Manual	DQ	Unknown	Unknown	ddPCR Supermix for Probes (no dUTP)	FAM	1.14596			0.27368	0.00240646	20533	1	20532	0	0	0	0									14700														16147.1	7882.87	7883.27
G03	Positive 1:100	Sabella	2170.53	Manual	DQ	Unknown	Unknown	ddPCR Supermix for Probes (no dUTP)	FAM	43410.7			2209.32	2132.98	19458	16383	3075	0	0	0	0									14700														18607.3	8047.02	16938.4
H03	NTC	Sabella	0	Manual	DQ	Unknown	Unknown	ddPCR Supermix for Probes (no dUTP)	FAM	0			0.177366	0	19874	0	19874	0	0	0	0									14700														0	7905.22	7905.22
[truncated: 15 more columns]

## Sheet: Styela
sample	id	target	conc_copies_u_l	status	experiment	sample_type	target_type	supermix	dye_name_s	copies_20m_l_well	total_conf_max	total_conf_min	poisson_conf_max	poisson_conf_min	accepted_droplets	positives	negatives	ch1_ch2	ch1_ch2_2	ch1_ch2_3	ch1_ch2_4	linkage	cnv	total_cnv_max	total_cnv_min	poisson_cnv_max	poisson_cnv_min	reference_copies	unknown_copies	threshold1	threshold2	threshold3	reference_used	ratio	total_ratio_max	total_ratio_min	poisson_ratio_max	poisson_ratio_min	fractional_abundance	total_fractional_abundance_max	total_fractional_abundance_min	poisson_fractional_abundance_max	poisson_fractional_abundance_min	mean_amplitude_of_positives	mean_amplitude_of_negatives	mean_amplitude_total	experiment_comments	merged_wells	total_confidence_max68
S1.3	S1.3	Styela	0	Manual	DQ	Unknown	Unknown	ddPCR Supermix for Probes (no dUTP)	HEX	0	NA	NA	0.165537	0	21294	0	21294	0	0	0	0	NA	NA	NA	NA	NA	NA	NA	NA	6000	NA	NA	NA	NA	NA	NA	NA	NA	NA	NA	NA	NA	NA	0	1270.77	1270.77	NA	NA	NA
M1.1	M1.1	Styela	0	Manual	DQ	Unknown	Unknown	ddPCR Supermix for Probes (no dUTP)	HEX	0	NA	NA	0.159572	0	22090	0	22090	0	0	0	0	NA	NA	NA	NA	NA	NA	NA	NA	6000	NA	NA	NA	NA	NA	NA	NA	NA	NA	NA	NA	NA	NA	0	1266.45	1266.45	NA	NA	NA
M1.2	M1.2	Styela	0	Manual	DQ	Unknown	Unknown	ddPCR Supermix for Probes (no dUTP)	HEX	0	NA	NA	0.207941	0	16952	0	16952	0	0	0	0	NA	NA	NA	NA	NA	NA	NA	NA	6000	NA	NA	NA	NA	NA	NA	NA	NA	NA	NA	NA	NA	NA	0	1125.93	1125.93	NA	NA	NA
M1.3	M1.3	Styela	0	Manual	DQ	Unknown	Unknown	ddPCR Supermix for Probes (no dUTP)	HEX	0	NA	NA	0.162463	0	21697	0	21697	0	0	0	0	NA	NA	NA	NA	NA	NA	NA	NA	6000	NA	NA	NA	NA	NA	NA	NA	NA	NA	NA	NA	NA	NA	0	1270.44	1270.44	NA	NA	NA
N1.1	N1.1	Styela	0	Manual	DQ	Unknown	Unknown	ddPCR Supermix for Probes (no dUTP)	HEX	0	NA	NA	0.161591	0	21814	0	21814	0	0	0	0	NA	NA	NA	NA	NA	NA	NA	NA	6000	NA	NA	NA	NA	NA	NA	NA	NA	NA	NA	NA	NA	NA	0	1258.56	1258.56	NA	NA	NA
N1.2	N1.2	Styela	0	Manual	DQ	Unknown	Unknown	ddPCR Supermix for Probes (no dUTP)	HEX	0	NA	NA	0.166224	0	21206	0	21206	0	0	0	0	NA	NA	NA	NA	NA	NA	NA	NA	6000	NA	NA	NA	NA	NA	NA	NA	NA	NA	NA	NA	NA	NA	0	1256.54	1256.54	NA	NA	NA
N1.3	N1.3	Styela	0	Manual	DQ	Unknown	Unknown	ddPCR Supermix for Probes (no dUTP)	HEX	0	NA	NA	0.159399	0	22114	0	22114	0	0	0	0	NA	NA	NA	NA	NA	NA	NA	NA	6000	NA	NA	NA	NA	NA	NA	NA	NA	NA	NA	NA	NA	NA	0	1266.87	1266.87	NA	NA	NA
D1.1	D1.1	Styela	0	Manual	DQ	Unknown	Unknown	ddPCR Supermix for Probes (no dUTP)	HEX	0	NA	NA	0.163381	0	21575	0	21575	0	0	0	0	NA	NA	NA	NA	NA	NA	NA	NA	6000	NA	NA	NA	NA	NA	NA	NA	NA	NA	NA	NA	NA	NA	0	1272.12	1272.12	NA	NA	NA
D1.2	D1.2	Styela	0	Manual	DQ	Unknown	Unknown	ddPCR Supermix for Probes (no dUTP)	HEX	0	NA	NA	0.167282	0	21072	0	21072	0	0	0	0	NA	NA	NA	NA	NA	NA	NA	NA	6000	NA	NA	NA	NA	NA	NA	NA	NA	NA	NA	NA	NA	NA	0	1223.34	1223.34	NA	NA	NA
Blank 1	Blank 1	Styela	0	Manual	DQ	Unknown	Unknown	ddPCR Supermix for Probes (no dUTP)	HEX	0	NA	NA	0.160546	0	21956	0	21956	0	0	0	0	NA	NA	NA	NA	NA	NA	NA	NA	6000	NA	NA	NA	NA	NA	NA	NA	NA	NA	NA	NA	NA	NA	0	1214.23	1214.23	NA	NA	NA
D1.3 a	D1.3	Styela	0.0551466	Manual	DQ	Unknown	Unknown	ddPCR Supermix for Probes (no dUTP)	HEX	1.10293	NA	NA	0.263404	0.00231611	21334	1	21333	0	0	0	0	NA	NA	NA	NA	NA	NA	NA	NA	6000	NA	NA	NA	NA	NA	NA	NA	NA	NA	NA	NA	NA	NA	6366.27	1218.12	1218.36	NA	NA	NA
D1.3 b	D1.3	Styela	0	Manual	DQ	Unknown	Unknown	ddPCR Supermix for Probes (no dUTP)	HEX	0	NA	NA	0.160429	0	21972	0	21972	0	0	0	0	NA	NA	NA	NA	NA	NA	NA	NA	6000	NA	NA	NA	NA	NA	NA	NA	NA	NA	NA	NA	NA	NA	0	1232.79	1232.79	NA	NA	NA
S2.1 a	S2.1	Styela	0	Manual	DQ	Unknown	Unknown	ddPCR Supermix for Probes (no dUTP)	HEX	0	NA	NA	0.174382	0	20214	0	20214	0	0	0	0	NA	NA	NA	NA	NA	NA	NA	NA	6000	NA	NA	NA	NA	NA	NA	NA	NA	NA	NA	NA	NA	NA	0	1270.86	1270.86	NA	NA	NA
S2.1 b	S2.1	Styela	0	Manual	DQ	Unknown	Unknown	ddPCR Supermix for Probes (no dUTP)	HEX	0	NA	NA	0.155668	0	22644	0	22644	0	0	0	0	NA	NA	NA	NA	NA	NA	NA	NA	6000	NA	NA	NA	NA	NA	NA	NA	NA	NA	NA	NA	NA	NA	0	1288.51	1288.51	NA	NA	NA
S2.2 a	S2.2	Styela	0	Manual	DQ	Unknown	Unknown	ddPCR Supermix for Probes (no dUTP)	HEX	0	NA	NA	0.162981	0	21628	0	21628	0	0	0	0	NA	NA	NA	NA	NA	NA	NA	NA	6000	NA	NA	NA	NA	NA	NA	NA	NA	NA	NA	NA	NA	NA	0	1272.65	1272.65	NA	NA	NA
S2.2 b	S2.2	Styela	0	Manual	DQ	Unknown	Unknown	ddPCR Supermix for Probes (no dUTP)	HEX	0	NA	NA	0.172235	0	20466	0	20466	0	0	0	0	NA	NA	NA	NA	NA	NA	NA	NA	6000	NA	NA	NA	NA	NA	NA	NA	NA	NA	NA	NA	NA	NA	0	1216.27	1216.27	NA	NA	NA
S2.3 a	S2.3	Styela	0.0560932	Manual	DQ	Unknown	Unknown	ddPCR Supermix for Probes (no dUTP)	HEX	1.12186	NA	NA	0.267925	0.00235586	20974	1	20973	0	0	0	0	NA	NA	NA	NA	NA	NA	NA	NA	6000	NA	NA	NA	NA	NA	NA	NA	NA	NA	NA	NA	NA	NA	6674.1	1283.76	1284.02	NA	NA	NA
S2.3 b	S2.3	Styela	0	Manual	DQ	Unknown	Unknown	ddPCR Supermix for Probes (no dUTP)	HEX	0	NA	NA	0.158753	0	22204	0	22204	0	0	0	0	NA	NA	NA	NA	NA	NA	NA	NA	6000	NA	NA	NA	NA	NA	NA	NA	NA	NA	NA	NA	NA	NA	0	1291.73	1291.73	NA	NA	NA
M2.1 a	M2.1	Styela	0	Manual	DQ	Unknown	Unknown	ddPCR Supermix for Probes (no dUTP)	HEX	0	NA	NA	0.16441	0	21440	0	21440	0	0	0	0	NA	NA	NA	NA	NA	NA	NA	NA	6000	NA	NA	NA	NA	NA	NA	NA	NA	NA	NA	NA	NA	NA	0	1321.31	1321.31	NA	NA	NA
M2.1 b	M2.1	Styela	0	Manual	DQ	Unknown	Unknown	ddPCR Supermix for Probes (no dUTP)	HEX	0	NA	NA	0.156838	0	22475	0	22475	0	0	0	0	NA	NA	NA	NA	NA	NA	NA	NA	6000	NA	NA	NA	NA	NA	NA	NA	NA	NA	NA	NA	NA	NA	0	1311.14	1311.14	NA	NA	NA
M2.2 a	M2.2	Styela	0.115143	Manual	DQ	Unknown	Unknown	ddPCR Supermix for Probes (no dUTP)	HEX	2.30285	NA	NA	0.368842	0.0174434	20436	2	20434	0	0	0	0	NA	NA	NA	NA	NA	NA	NA	NA	6000	NA	NA	NA	NA	NA	NA	NA	NA	NA	NA	NA	NA	NA	6337.38	1306.18	1306.67	NA	NA	NA
M2.2 b	M2.2	Styela	0	Manual	DQ	Unknown	Unknown	ddPCR Supermix for Probes (no dUTP)	HEX	0	NA	NA	0.156838	0	22475	0	22475	0	0	0	0	NA	NA	NA	NA	NA	NA	NA	NA	6000	NA	NA	NA	NA	NA	NA	NA	NA	NA	NA	NA	NA	NA	0	1302.29	1302.29	NA	NA	NA
M2.3 a	M2.3	Styela	0	Manual	DQ	Unknown	Unknown	ddPCR Supermix for Probes (no dUTP)	HEX	0	NA	NA	0.161628	0	21809	0	21809	0	0	0	0	NA	NA	NA	NA	NA	NA	NA	NA	6000	NA	NA	NA	NA	NA	NA	NA	NA	NA	NA	NA	NA	NA	0	1301.07	1301.07	NA	NA	NA
M2.3 b	M2.3	Styela	0	Manual	DQ	Unknown	Unknown	ddPCR Supermix for Probes (no dUTP)	HEX	0	NA	NA	0.164272	0	21458	0	21458	0	0	0	0	NA	NA	NA	NA	NA	NA	NA	NA	6000	NA	NA	NA	NA	NA	NA	NA	NA	NA	NA	NA	NA	NA	0	1285.12	1285.12	NA	NA	NA
N2.1 a	N2.1	Styela	0	Manual	DQ	Unknown	Unknown	ddPCR Supermix for Probes (no dUTP)	HEX	0	NA	NA	0.161332	0	21849	0	21849	0	0	0	0	NA	NA	NA	NA	NA	NA	NA	NA	6000	NA	NA	NA	NA	NA	NA	NA	NA	NA	NA	NA	NA	NA	0	1293.18	1293.18	NA	NA	NA
N2.1 b	N2.1	Styela	0	Manual	DQ	Unknown	Unknown	ddPCR Supermix for Probes (no dUTP)	HEX	0	NA	NA	0.164933	0	21372	0	21372	0	0	0	0	NA	NA	NA	NA	NA	NA	NA	NA	6000	NA	NA	NA	NA	NA	NA	NA	NA	NA	NA	NA	NA	NA	0	1299.97	1299.97	NA	NA	NA
N2.2 a	N2.2	Styela	0	Manual	DQ	Unknown	Unknown	ddPCR Supermix for Probes (no dUTP)	HEX	0	NA	NA	0.163799	0	21520	0	21520	0	0	0	0	NA	NA	NA	NA	NA	NA	NA	NA	6000	NA	NA	NA	NA	NA	NA	NA	NA	NA	NA	NA	NA	NA	0	1350.04	1350.04	NA	NA	NA
N2.2 b	N2.2	Styela	0	Manual	DQ	Unknown	Unknown	ddPCR Supermix for Probes (no dUTP)	HEX	0	NA	NA	0.156497	0	22524	0	22524	0	0	0	0	NA	NA	NA	NA	NA	NA	NA	NA	6000	NA	NA	NA	NA	NA	NA	NA	NA	NA	NA	NA	NA	NA	0	1304.52	1304.52	NA	NA	NA
N2.3B	N2.3	Styela	0	Manual	DQ	Unknown	Unknown	ddPCR Supermix for Probes (no dUTP)	HEX	0	NA	NA	0.159724	0	22069	0	22069	0	0	0	0	NA	NA	NA	NA	NA	NA	NA	NA	6000	NA	NA	NA	NA	NA	NA	NA	NA	NA	NA	NA	NA	NA	0	1319.8	1319.8	NA	NA	NA
N2.3P	N2.3	Styela	0	Manual	DQ	Unknown	Unknown	ddPCR Supermix for Probes (no dUTP)	HEX	0	NA	NA	0.15924	0	22136	0	22136	0	0	0	0	NA	NA	NA	NA	NA	NA	NA	NA	6000	NA	NA	NA	NA	NA	NA	NA	NA	NA	NA	NA	NA	NA	0	1324.66	1324.66	NA	NA	NA
D2.1 a	D2.1	Styela	0.060136	Manual	DQ	Unknown	Unknown	ddPCR Supermix for Probes (no dUTP)	HEX	1.20272	NA	NA	0.287237	0.00252565	19564	1	19563	0	0	0	0	NA	NA	NA	NA	NA	NA	NA	NA	6000	NA	NA	NA	NA	NA	NA	NA	NA	NA	NA	NA	NA	NA	6427.56	1339.03	1339.29	NA	NA	NA
D2.1 b	D2.1	Styela	0	Manual	DQ	Unknown	Unknown	ddPCR Supermix for Probes (no dUTP)	HEX	0	NA	NA	0.167369	0	21061	0	21061	0	0	0	0	NA	NA	NA	NA	NA	NA	NA	NA	6000	NA	NA	NA	NA	NA	NA	NA	NA	NA	NA	NA	NA	NA	0	1322.53	1322.53	NA	NA	NA
D2.2 a	D2.2	Styela	0	Manual	DQ	Unknown	Unknown	ddPCR Supermix for Probes (no dUTP)	HEX	0	NA	NA	0.163503	0	21559	0	21559	0	0	0	0	NA	NA	NA	NA	NA	NA	NA	NA	6000	NA	NA	NA	NA	NA	NA	NA	NA	NA	NA	NA	NA	NA	0	1307.41	1307.41	NA	NA	NA
D2.2 b	D2.2	Styela	0	Manual	DQ	Unknown	Unknown	ddPCR Supermix for Probes (no dUTP)	HEX	0	NA	NA	0.164687	0	21404	0	21404	0	0	0	0	NA	NA	NA	NA	NA	NA	NA	NA	6000	NA	NA	NA	NA	NA	NA	NA	NA	NA	NA	NA	NA	NA	0	1331.02	1331.02	NA	NA	NA
D2.3 a	D2.3	Styela	0.165471	Manual	DQ	Unknown	Unknown	ddPCR Supermix for Probes (no dUTP)	HEX	3.30942	NA	NA	0.438604	0.0392697	21331	3	21328	0	0	0	0	NA	NA	NA	NA	NA	NA	NA	NA	6000	NA	NA	NA	NA	NA	NA	NA	NA	NA	NA	NA	NA	NA	6753.46	1321.95	1322.71	NA	NA	NA
D2.3 b	D2.3	Styela	0	Manual	DQ	Unknown	Unknown	ddPCR Supermix for Probes (no dUTP)	HEX	0	NA	NA	0.17857	0	19740	0	19740	0	0	0	0	NA	NA	NA	NA	NA	NA	NA	NA	6000	NA	NA	NA	NA	NA	NA	NA	NA	NA	NA	NA	NA	NA	0	1370.81	1370.81	NA	NA	NA
S3.1a	S3.1	Styela	0	Manual	DQ	Unknown	Unknown	ddPCR Supermix for Probes (no dUTP)	HEX	0	NA	NA	0.166264	0	21201	0	21201	0	0	0	0	NA	NA	NA	NA	NA	NA	NA	NA	6000	NA	NA	NA	NA	NA	NA	NA	NA	NA	NA	NA	NA	NA	0	1334.11	1334.11	NA	NA	NA
S3.1b	S3.1	Styela	0	Manual	DQ	Unknown	Unknown	ddPCR Supermix for Probes (no dUTP)	HEX	0	NA	NA	0.163503	0	21559	0	21559	0	0	0	0	NA	NA	NA	NA	NA	NA	NA	NA	6000	NA	NA	NA	NA	NA	NA	NA	NA	NA	NA	NA	NA	NA	0	1380.5	1380.5	NA	NA	NA
S3.2a	S3.2	Styela	0.166792	Manual	DQ	Unknown	Unknown	ddPCR Supermix for Probes (no dUTP)	HEX	3.33585	NA	NA	0.442107	0.0395833	21162	3	21159	0	0	0	0	NA	NA	NA	NA	NA	NA	NA	NA	6000	NA	NA	NA	NA	NA	NA	NA	NA	NA	NA	NA	NA	NA	6719.85	1345.6	1346.36	NA	NA	NA
S3.2b	S3.2	Styela	0	Manual	DQ	Unknown	Unknown	ddPCR Supermix for Probes (no dUTP)	HEX	0	NA	NA	0.166021	0	21232	0	21232	0	0	0	0	NA	NA	NA	NA	NA	NA	NA	NA	6000	NA	NA	NA	NA	NA	NA	NA	NA	NA	NA	NA	NA	NA	0	1329.79	1329.79	NA	NA	NA
S3.3a	S3.3	Styela	0	Manual	DQ	Unknown	Unknown	ddPCR Supermix for Probes (no dUTP)	HEX	0	NA	NA	0.171832	0	20514	0	20514	0	0	0	0	NA	NA	NA	NA	NA	NA	NA	NA	6000	NA	NA	NA	NA	NA	NA	NA	NA	NA	NA	NA	NA	NA	0	1373.63	1373.63	NA	NA	NA
S3.3b	S3.3	Styela	0	Manual	DQ	Unknown	Unknown	ddPCR Supermix for Probes (no dUTP)	HEX	0	NA	NA	0.173652	0	20299	0	20299	0	0	0	0	NA	NA	NA	NA	NA	NA	NA	NA	6000	NA	NA	NA	NA	NA	NA	NA	NA	NA	NA	NA	NA	NA	0	1340.48	1340.48	NA	NA	NA
M3.1a	M3.1	Styela	0.0588309	Manual	DQ	Unknown	Unknown	ddPCR Supermix for Probes (no dUTP)	HEX	1.17662	NA	NA	0.281003	0.00247084	19998	1	19997	0	0	0	0	NA	NA	NA	NA	NA	NA	NA	NA	6000	NA	NA	NA	NA	NA	NA	NA	NA	NA	NA	NA	NA	NA	7933.74	1355.04	1355.37	NA	NA	NA
M3.1b	M3.1	Styela	0.0565407	Manual	DQ	Unknown	Unknown	ddPCR Supermix for Probes (no dUTP)	HEX	1.13081	NA	NA	0.270063	0.00237465	20808	1	20807	0	0	0	0	NA	NA	NA	NA	NA	NA	NA	NA	6000	NA	NA	NA	NA	NA	NA	NA	NA	NA	NA	NA	NA	NA	7180.42	1399.11	1399.39	NA	NA	NA
M3.2a	M3.2	Styela	0.0592248	Manual	DQ	Unknown	Unknown	ddPCR Supermix for Probes (no dUTP)	HEX	1.1845	NA	NA	0.282884	0.00248738	19865	1	19864	0	0	0	0	NA	NA	NA	NA	NA	NA	NA	NA	6000	NA	NA	NA	NA	NA	NA	NA	NA	NA	NA	NA	NA	NA	6474.65	1316.45	1316.71	NA	NA	NA
M3.2b	M3.2	Styela	0	Manual	DQ	Unknown	Unknown	ddPCR Supermix for Probes (no dUTP)	HEX	0	NA	NA	0.172708	0	20410	0	20410	0	0	0	0	NA	NA	NA	NA	NA	NA	NA	NA	6000	NA	NA	NA	NA	NA	NA	NA	NA	NA	NA	NA	NA	NA	0	1391.28	1391.28	NA	NA	NA
M3.3a	M3.3	Styela	0.057836	Manual	DQ	Unknown	Unknown	ddPCR Supermix for Probes (no dUTP)	HEX	1.15672	NA	NA	0.27625	0.00242905	20342	1	20341	0	0	0	0	NA	NA	NA	NA	NA	NA	NA	NA	6000	NA	NA	NA	NA	NA	NA	NA	NA	NA	NA	NA	NA	NA	6945.97	1350.07	1350.34	NA	NA	NA
M3.3b	M3.3	Styela	0	Manual	DQ	Unknown	Unknown	ddPCR Supermix for Probes (no dUTP)	HEX	0	NA	NA	0.159471	0	22104	0	22104	0	0	0	0	NA	NA	NA	NA	NA	NA	NA	NA	6000	NA	NA	NA	NA	NA	NA	NA	NA	NA	NA	NA	NA	NA	0	1344.15	1344.15	NA	NA	NA
Blank 2	Blank 2	Styela	0	Manual	DQ	Unknown	Unknown	ddPCR Supermix for Probes (no dUTP)	HEX	0	NA	NA	0.155578	0	22657	0	22657	0	0	0	0	NA	NA	NA	NA	NA	NA	NA	NA	6000	NA	NA	NA	NA	NA	NA	NA	NA	NA	NA	NA	NA	NA	0	1294.15	1294.15	NA	NA	NA
N3.1a	N3.1	Styela	0	Manual	DQ	Unknown	Unknown	ddPCR Supermix for Probes (no dUTP)	HEX	0	NA	NA	0.16451	0	21427	0	21427	0	0	0	0	NA	NA	NA	NA	NA	NA	NA	NA	6000	NA	NA	NA	NA	NA	NA	NA	NA	NA	NA	NA	NA	NA	0	1363.48	1363.48	NA	NA	NA
N3.1b	N3.1	Styela	0	Manual	DQ	Unknown	Unknown	ddPCR Supermix for Probes (no dUTP)	HEX	0	NA	NA	0.164364	0	21446	0	21446	0	0	0	0	NA	NA	NA	NA	NA	NA	NA	NA	6000	NA	NA	NA	NA	NA	NA	NA	NA	NA	NA	NA	NA	NA	0	1318.12	1318.12	NA	NA	NA
N3.2a	N3.2	Styela	0	Manual	DQ	Unknown	Unknown	ddPCR Supermix for Probes (no dUTP)	HEX	0	NA	NA	0.164656	0	21408	0	21408	0	0	0	0	NA	NA	NA	NA	NA	NA	NA	NA	6000	NA	NA	NA	NA	NA	NA	NA	NA	NA	NA	NA	NA	NA	0	1365.44	1365.44	NA	NA	NA
N3.2b	N3.2	Styela	0	Manual	DQ	Unknown	Unknown	ddPCR Supermix for Probes (no dUTP)	HEX	0	NA	NA	0.165041	0	21358	0	21358	0	0	0	0	NA	NA	NA	NA	NA	NA	NA	NA	6000	NA	NA	NA	NA	NA	NA	NA	NA	NA	NA	NA	NA	NA	0	1350.79	1350.79	NA	NA	NA
N3.3a	N3.3	Styela	0	Manual	DQ	Unknown	Unknown	ddPCR Supermix for Probes (no dUTP)	HEX	0	NA	NA	0.174841	0	20161	0	20161	0	0	0	0	NA	NA	NA	NA	NA	NA	NA	NA	6000	NA	NA	NA	NA	NA	NA	NA	NA	NA	NA	NA	NA	NA	0	1343.67	1343.67	NA	NA	NA
N3.3b	N3.3	Styela	0	Manual	DQ	Unknown	Unknown	ddPCR Supermix for Probes (no dUTP)	HEX	0	NA	NA	0.168707	0	20894	0	20894	0	0	0	0	NA	NA	NA	NA	NA	NA	NA	NA	6000	NA	NA	NA	NA	NA	NA	NA	NA	NA	NA	NA	NA	NA	0	1397.78	1397.78	NA	NA	NA
D3.1a	D3.1	Styela	0	Manual	DQ	Unknown	Unknown	ddPCR Supermix for Probes (no dUTP)	HEX	0	NA	NA	0.167783	0	21009	0	21009	0	0	0	0	NA	NA	NA	NA	NA	NA	NA	NA	6000	NA	NA	NA	NA	NA	NA	NA	NA	NA	NA	NA	NA	NA	0	1398.37	1398.37	NA	NA	NA
D3.1b	D3.1	Styela	0	Manual	DQ	Unknown	Unknown	ddPCR Supermix for Probes (no dUTP)	HEX	0	NA	NA	0.16268	0	21668	0	21668	0	0	0	0	NA	NA	NA	NA	NA	NA	NA	NA	6000	NA	NA	NA	NA	NA	NA	NA	NA	NA	NA	NA	NA	NA	0	1334.41	1334.41	NA	NA	NA
D3.2a	D3.2	Styela	0	Manual	DQ	Unknown	Unknown	ddPCR Supermix for Probes (no dUTP)	HEX	0	NA	NA	0.162635	0	21674	0	21674	0	0	0	0	NA	NA	NA	NA	NA	NA	NA	NA	6000	NA	NA	NA	NA	NA	NA	NA	NA	NA	NA	NA	NA	NA	0	1401.92	1401.92	NA	NA	NA
D3.2b	D3.2	Styela	0	Manual	DQ	Unknown	Unknown	ddPCR Supermix for Probes (no dUTP)	HEX	0	NA	NA	0.168982	0	20860	0	20860	0	0	0	0	NA	NA	NA	NA	NA	NA	NA	NA	6000	NA	NA	NA	NA	NA	NA	NA	NA	NA	NA	NA	NA	NA	0	1414.03	1414.03	NA	NA	NA
D3.3B	D3.3	Styela	0	Manual	DQ	Unknown	Unknown	ddPCR Supermix for Probes (no dUTP)	HEX	0	NA	NA	0.166264	0	21201	0	21201	0	0	0	0	NA	NA	NA	NA	NA	NA	NA	NA	6000	NA	NA	NA	NA	NA	NA	NA	NA	NA	NA	NA	NA	NA	0	1359.47	1359.47	NA	NA	NA
D3.3P	D3.3	Styela	0.0541043	Manual	DQ	Unknown	Unknown	ddPCR Supermix for Probes (no dUTP)	HEX	1.08209	NA	NA	0.258424	0.00227233	21745	1	21744	0	0	0	0	NA	NA	NA	NA	NA	NA	NA	NA	6000	NA	NA	NA	NA	NA	NA	NA	NA	NA	NA	NA	NA	NA	9850.54	1345.64	1346.03	NA	NA	NA
S4.1a	S4.1	Styela	0	Manual	DQ	Unknown	Unknown	ddPCR Supermix for Probes (no dUTP)	HEX	0	NA	NA	0.173738	0	20289	0	20289	0	0	0	0	NA	NA	NA	NA	NA	NA	NA	NA	6000	NA	NA	NA	NA	NA	NA	NA	NA	NA	NA	NA	NA	NA	0	1367.43	1367.43	NA	NA	NA
S4.1b	S4.1	Styela	0	Manual	DQ	Unknown	Unknown	ddPCR Supermix for Probes (no dUTP)	HEX	0	NA	NA	0.162567	0	21683	0	21683	0	0	0	0	NA	NA	NA	NA	NA	NA	NA	NA	6000	NA	NA	NA	NA	NA	NA	NA	NA	NA	NA	NA	NA	NA	0	1381.41	1381.41	NA	NA	NA
S4.2a	S4.2	Styela	0	Manual	DQ	Unknown	Unknown	ddPCR Supermix for Probes (no dUTP)	HEX	0	NA	NA	0.167289	0	21071	0	21071	0	0	0	0	NA	NA	NA	NA	NA	NA	NA	NA	6000	NA	NA	NA	NA	NA	NA	NA	NA	NA	NA	NA	NA	NA	0	1382.05	1382.05	NA	NA	NA
S4.2b	S4.2	Styela	0	Manual	DQ	Unknown	Unknown	ddPCR Supermix for Probes (no dUTP)	HEX	0	NA	NA	0.171807	0	20517	0	20517	0	0	0	0	NA	NA	NA	NA	NA	NA	NA	NA	6000	NA	NA	NA	NA	NA	NA	NA	NA	NA	NA	NA	NA	NA	0	1354.1	1354.1	NA	NA	NA
S4.3a	S4.3	Styela	0	Manual	DQ	Unknown	Unknown	ddPCR Supermix for Probes (no dUTP)	HEX	0	NA	NA	0.171256	0	20583	0	20583	0	0	0	0	NA	NA	NA	NA	NA	NA	NA	NA	6000	NA	NA	NA	NA	NA	NA	NA	NA	NA	NA	NA	NA	NA	0	1365.12	1365.12	NA	NA	NA
S4.3b	S4.3	Styela	0	Manual	DQ	Unknown	Unknown	ddPCR Supermix for Probes (no dUTP)	HEX	0	NA	NA	0.170519	0	20672	0	20672	0	0	0	0	NA	NA	NA	NA	NA	NA	NA	NA	6000	NA	NA	NA	NA	NA	NA	NA	NA	NA	NA	NA	NA	NA	0	1394.54	1394.54	NA	NA	NA
M4.1a	M4.1	Styela	0	Manual	DQ	Unknown	Unknown	ddPCR Supermix for Probes (no dUTP)	HEX	0	NA	NA	0.169363	0	20813	0	20813	0	0	0	0	NA	NA	NA	NA	NA	NA	NA	NA	6000	NA	NA	NA	NA	NA	NA	NA	NA	NA	NA	NA	NA	NA	0	1373.27	1373.27	NA	NA	NA
M4.1b	M4.1	Styela	0	Manual	DQ	Unknown	Unknown	ddPCR Supermix for Probes (no dUTP)	HEX	0	NA	NA	0.176496	0	19972	0	19972	0	0	0	0	NA	NA	NA	NA	NA	NA	NA	NA	6000	NA	NA	NA	NA	NA	NA	NA	NA	NA	NA	NA	NA	NA	0	1398.39	1398.39	NA	NA	NA
M4.2a	M4.2	Styela	0	Manual	DQ	Unknown	Unknown	ddPCR Supermix for Probes (no dUTP)	HEX	0	NA	NA	0.165274	0	21328	0	21328	0	0	0	0	NA	NA	NA	NA	NA	NA	NA	NA	6000	NA	NA	NA	NA	NA	NA	NA	NA	NA	NA	NA	NA	NA	0	1343.53	1343.53	NA	NA	NA
M4.2b	M4.2	Styela	0	Manual	DQ	Unknown	Unknown	ddPCR Supermix for Probes (no dUTP)	HEX	0	NA	NA	0.160817	0	21919	0	21919	0	0	0	0	NA	NA	NA	NA	NA	NA	NA	NA	6000	NA	NA	NA	NA	NA	NA	NA	NA	NA	NA	NA	NA	NA	0	1370.02	1370.02	NA	NA	NA
M4.3a	M4.3	Styela	0	Manual	DQ	Unknown	Unknown	ddPCR Supermix for Probes (no dUTP)	HEX	0	NA	NA	0.164234	0	21463	0	21463	0	0	0	0	NA	NA	NA	NA	NA	NA	NA	NA	6000	NA	NA	NA	NA	NA	NA	NA	NA	NA	NA	NA	NA	NA	0	1348.51	1348.51	NA	NA	NA
M4.3b	M4.3	Styela	0	Manual	DQ	Unknown	Unknown	ddPCR Supermix for Probes (no dUTP)	HEX	0	NA	NA	0.170107	0	20722	0	20722	0	0	0	0	NA	NA	NA	NA	NA	NA	NA	NA	6000	NA	NA	NA	NA	NA	NA	NA	NA	NA	NA	NA	NA	NA	0	1353.37	1353.37	NA	NA	NA
N4.1a	N4.1	Styela	0	Manual	DQ	Unknown	Unknown	ddPCR Supermix for Probes (no dUTP)	HEX	0	NA	NA	0.165569	0	21290	0	21290	0	0	0	0	NA	NA	NA	NA	NA	NA	NA	NA	6000	NA	NA	NA	NA	NA	NA	NA	NA	NA	NA	NA	NA	NA	0	1362.92	1362.92	NA	NA	NA
N4.1b	N4.1	Styela	0	Manual	DQ	Unknown	Unknown	ddPCR Supermix for Probes (no dUTP)	HEX	0	NA	NA	0.163268	0	21590	0	21590	0	0	0	0	NA	NA	NA	NA	NA	NA	NA	NA	6000	NA	NA	NA	NA	NA	NA	NA	NA	NA	NA	NA	NA	NA	0	1405.68	1405.68	NA	NA	NA
N4.2a	N4.2	Styela	0	Manual	DQ	Unknown	Unknown	ddPCR Supermix for Probes (no dUTP)	HEX	0	NA	NA	0.160036	0	22026	0	22026	0	0	0	0	NA	NA	NA	NA	NA	NA	NA	NA	6000	NA	NA	NA	NA	NA	NA	NA	NA	NA	NA	NA	NA	NA	0	1453.74	1453.74	NA	NA	NA
N4.2b	N4.2	Styela	0	Manual	DQ	Unknown	Unknown	ddPCR Supermix for Probes (no dUTP)	HEX	0	NA	NA	0.162996	0	21626	0	21626	0	0	0	0	NA	NA	NA	NA	NA	NA	NA	NA	6000	NA	NA	NA	NA	NA	NA	NA	NA	NA	NA	NA	NA	NA	0	1382.93	1382.93	NA	NA	NA
N4.3a	N4.3	Styela	0	Manual	DQ	Unknown	Unknown	ddPCR Supermix for Probes (no dUTP)	HEX	0	NA	NA	0.15914	0	22150	0	22150	0	0	0	0	NA	NA	NA	NA	NA	NA	NA	NA	6000	NA	NA	NA	NA	NA	NA	NA	NA	NA	NA	NA	NA	NA	0	1389.32	1389.32	NA	NA	NA
N4.3b	N4.3	Styela	0	Manual	DQ	Unknown	Unknown	ddPCR Supermix for Probes (no dUTP)	HEX	0	NA	NA	0.167711	0	21018	0	21018	0	0	0	0	NA	NA	NA	NA	NA	NA	NA	NA	6000	NA	NA	NA	NA	NA	NA	NA	NA	NA	NA	NA	NA	NA	0	1361.62	1361.62	NA	NA	NA
D4.1a	D4.1	Styela	0	Manual	DQ	Unknown	Unknown	ddPCR Supermix for Probes (no dUTP)	HEX	0	NA	NA	0.159413	0	22112	0	22112	0	0	0	0	NA	NA	NA	NA	NA	NA	NA	NA	6000	NA	NA	NA	NA	NA	NA	NA	NA	NA	NA	NA	NA	NA	0	1366.66	1366.66	NA	NA	NA
D4.1b	D4.1	Styela	0	Manual	DQ	Unknown	Unknown	ddPCR Supermix for Probes (no dUTP)	HEX	0	NA	NA	0.171874	0	20509	0	20509	0	0	0	0	NA	NA	NA	NA	NA	NA	NA	NA	6000	NA	NA	NA	NA	NA	NA	NA	NA	NA	NA	NA	NA	NA	0	1357.82	1357.82	NA	NA	NA
D4.2a	D4.2	Styela	0	Manual	DQ	Unknown	Unknown	ddPCR Supermix for Probes (no dUTP)	HEX	0	NA	NA	0.174789	0	20167	0	20167	0	0	0	0	NA	NA	NA	NA	NA	NA	NA	NA	6000	NA	NA	NA	NA	NA	NA	NA	NA	NA	NA	NA	NA	NA	0	1341.96	1341.96	NA	NA	NA
D4.2b	D4.2	Styela	0	Manual	DQ	Unknown	Unknown	ddPCR Supermix for Probes (no dUTP)	HEX	0	NA	NA	0.172767	0	20403	0	20403	0	0	0	0	NA	NA	NA	NA	NA	NA	NA	NA	6000	NA	NA	NA	NA	NA	NA	NA	NA	NA	NA	NA	NA	NA	0	1372.32	1372.32	NA	NA	NA
D4.3a	D4.3	Styela	0	Manual	DQ	Unknown	Unknown	ddPCR Supermix for Probes (no dUTP)	HEX	0	NA	NA	0.159348	0	22121	0	22121	0	0	0	0	NA	NA	NA	NA	NA	NA	NA	NA	6000	NA	NA	NA	NA	NA	NA	NA	NA	NA	NA	NA	NA	NA	0	1398.49	1398.49	NA	NA	NA
D4.3b	D4.3	Styela	0	Manual	DQ	Unknown	Unknown	ddPCR Supermix for Probes (no dUTP)	HEX	0	NA	NA	0.178119	0	19790	0	19790	0	0	0	0	NA	NA	NA	NA	NA	NA	NA	NA	6000	NA	NA	NA	NA	NA	NA	NA	NA	NA	NA	NA	NA	NA	0	1400.11	1400.11	NA	NA	NA
S5.1B	S5.1	Styela	0	Manual	DQ	Unknown	Unknown	ddPCR Supermix for Probes (no dUTP)	HEX	0	NA	NA	0.161851	0	21779	0	21779	0	0	0	0	NA	NA	NA	NA	NA	NA	NA	NA	6000	NA	NA	NA	NA	NA	NA	NA	NA	NA	NA	NA	NA	NA	0	1398.23	1398.23	NA	NA	NA
S5.1P	S5.1	Styela	0	Manual	DQ	Unknown	Unknown	ddPCR Supermix for Probes (no dUTP)	HEX	0	NA	NA	0.173944	0	20265	0	20265	0	0	0	0	NA	NA	NA	NA	NA	NA	NA	NA	6000	NA	NA	NA	NA	NA	NA	NA	NA	NA	NA	NA	NA	NA	0	1401.88	1401.88	NA	NA	NA
S5.1a*	S5.1	Styela	0	Manual	DQ	Unknown	Unknown	ddPCR Supermix for Probes (no dUTP)	HEX	0	NA	NA	0.174512	0	20199	0	20199	0	0	0	0	NA	NA	NA	NA	NA	NA	NA	NA	6000	NA	NA	NA	NA	NA	NA	NA	NA	NA	NA	NA	NA	NA	0	1405.91	1405.91	NA	NA	NA
S5.1b*	S5.1	Styela	0	Manual	DQ	Unknown	Unknown	ddPCR Supermix for Probes (no dUTP)	HEX	0	NA	NA	0.163662	0	21538	0	21538	0	0	0	0	NA	NA	NA	NA	NA	NA	NA	NA	6000	NA	NA	NA	NA	NA	NA	NA	NA	NA	NA	NA	NA	NA	0	1320.58	1320.58	NA	NA	NA
S5.2a	S5.2	Styela	0	Manual	DQ	Unknown	Unknown	ddPCR Supermix for Probes (no dUTP)	HEX	0	NA	NA	0.163275	0	21589	0	21589	0	0	0	0	NA	NA	NA	NA	NA	NA	NA	NA	6000	NA	NA	NA	NA	NA	NA	NA	NA	NA	NA	NA	NA	NA	0	1319.89	1319.89	NA	NA	NA
S5.2b	S5.2	Styela	0	Manual	DQ	Unknown	Unknown	ddPCR Supermix for Probes (no dUTP)	HEX	0	NA	NA	0.163419	0	21570	0	21570	0	0	0	0	NA	NA	NA	NA	NA	NA	NA	NA	6000	NA	NA	NA	NA	NA	NA	NA	NA	NA	NA	NA	NA	NA	0	1327.48	1327.48	NA	NA	NA
S5.3a	S5.3	Styela	0	Manual	DQ	Unknown	Unknown	ddPCR Supermix for Probes (no dUTP)	HEX	0	NA	NA	0.171824	0	20515	0	20515	0	0	0	0	NA	NA	NA	NA	NA	NA	NA	NA	6000	NA	NA	NA	NA	NA	NA	NA	NA	NA	NA	NA	NA	NA	0	1379.07	1379.07	NA	NA	NA
S5.3b	S5.3	Styela	0	Manual	DQ	Unknown	Unknown	ddPCR Supermix for Probes (no dUTP)	HEX	0	NA	NA	0.175958	0	20033	0	20033	0	0	0	0	NA	NA	NA	NA	NA	NA	NA	NA	6000	NA	NA	NA	NA	NA	NA	NA	NA	NA	NA	NA	NA	NA	0	1330.85	1330.85	NA	NA	NA
Blank 3	Blank 3	Styela	0	Manual	DQ	Unknown	Unknown	ddPCR Supermix for Probes (no dUTP)	HEX	0	NA	NA	0.173558	0	20310	0	20310	0	0	0	0	NA	NA	NA	NA	NA	NA	NA	NA	6000	NA	NA	NA	NA	NA	NA	NA	NA	NA	NA	NA	NA	NA	0	1352.71	1352.71	NA	NA	NA
Negative	Negative	Styela	0	Manual	DQ	Unknown	Unknown	ddPCR Supermix for Probes (no dUTP)	HEX	0	NA	NA	0.178769	0	19718	0	19718	0	0	0	0	NA	NA	NA	NA	NA	NA	NA	NA	6000	NA	NA	NA	NA	NA	NA	NA	NA	NA	NA	NA	NA	NA	0	1385.24	1385.24	NA	NA	NA
Positive 1:100	Positive 1:100	Styela	695.855	Manual	DQ	Unknown	Unknown	ddPCR Supermix for Probes (no dUTP)	HEX	13917.1	NA	NA	710.783	681.114	19492	8703	10789	0	0	0	0	NA	NA	NA	NA	NA	NA	NA	NA	6000	NA	NA	NA	NA	NA	NA	NA	NA	NA	NA	NA	NA	NA	6737.71	1471.82	3822.99	NA	NA	NA
Blank 4	Blank 4	Styela	0	Manual	DQ	Unknown	Unknown	ddPCR Supermix for Probes (no dUTP)	HEX	0	NA	NA	0.174876	0	20157	0	20157	0	0	0	0	NA	NA	NA	NA	NA	NA	NA	NA	6000	NA	NA	NA	NA	NA	NA	NA	NA	NA	NA	NA	NA	NA	0	1300.72	1300.72	NA	NA	NA
M5.1a	M5.1	Styela	0	Manual	DQ	Unknown	Unknown	ddPCR Supermix for Probes (no dUTP)	HEX	0	NA	NA	0.167377	0	21060	0	21060	0	0	0	0	NA	NA	NA	NA	NA	NA	NA	NA	6000	NA	NA	NA	NA	NA	NA	NA	NA	NA	NA	NA	NA	NA	0	1311	1311	NA	NA	NA
M5.1b	M5.1	Styela	0.0562568	Manual	DQ	Unknown	Unknown	ddPCR Supermix for Probes (no dUTP)	HEX	1.12514	NA	NA	0.268707	0.00236273	20913	1	20912	0	0	0	0	NA	NA	NA	NA	NA	NA	NA	NA	6000	NA	NA	NA	NA	NA	NA	NA	NA	NA	NA	NA	NA	NA	6757.38	1331.32	1331.58	NA	NA	NA
M5.2T	M5.2	Styela	0.114878	Manual	DQ	Unknown	Unknown	ddPCR Supermix for Probes (no dUTP)	HEX	2.29757	NA	NA	0.367995	0.0174034	20483	2	20481	0	0	0	0	NA	NA	NA	NA	NA	NA	NA	NA	6000	NA	NA	NA	NA	NA	NA	NA	NA	NA	NA	NA	NA	NA	7594.6	1351.75	1352.36	NA	NA	NA
M5.2P	M5.2	Styela	0	Manual	DQ	Unknown	Unknown	ddPCR Supermix for Probes (no dUTP)	HEX	0	NA	NA	0.188321	0	18718	0	18718	0	0	0	0	NA	NA	NA	NA	NA	NA	NA	NA	6000	NA	NA	NA	NA	NA	NA	NA	NA	NA	NA	NA	NA	NA	0	1330.92	1330.92	NA	NA	NA
M5.3a	M5.3	Styela	0	Manual	DQ	Unknown	Unknown	ddPCR Supermix for Probes (no dUTP)	HEX	0	NA	NA	0.175075	0	20134	0	20134	0	0	0	0	NA	NA	NA	NA	NA	NA	NA	NA	6000	NA	NA	NA	NA	NA	NA	NA	NA	NA	NA	NA	NA	NA	0	1318.19	1318.19	NA	NA	NA
M5.3b	M5.3	Styela	0	Manual	DQ	Unknown	Unknown	ddPCR Supermix for Probes (no dUTP)	HEX	0	NA	NA	0.20344	0	17327	0	17327	0	0	0	0	NA	NA	NA	NA	NA	NA	NA	NA	6000	NA	NA	NA	NA	NA	NA	NA	NA	NA	NA	NA	NA	NA	0	1422.23	1422.23	NA	NA	NA
N5.1a	N5.1	Styela	0	Manual	DQ	Unknown	Unknown	ddPCR Supermix for Probes (no dUTP)	HEX	0	NA	NA	0.163525	0	21556	0	21556	0	0	0	0	NA	NA	NA	NA	NA	NA	NA	NA	6000	NA	NA	NA	NA	NA	NA	NA	NA	NA	NA	NA	NA	NA	0	1321.79	1321.79	NA	NA	NA
N5.1b	N5.1	Styela	0	Manual	DQ	Unknown	Unknown	ddPCR Supermix for Probes (no dUTP)	HEX	0	NA	NA	0.176372	0	19986	0	19986	0	0	0	0	NA	NA	NA	NA	NA	NA	NA	NA	6000	NA	NA	NA	NA	NA	NA	NA	NA	NA	NA	NA	NA	NA	0	1346.03	1346.03	NA	NA	NA
N5.2a	N5.2	Styela	0	Manual	DQ	Unknown	Unknown	ddPCR Supermix for Probes (no dUTP)	HEX	0	NA	NA	0.174426	0	20209	0	20209	0	0	0	0	NA	NA	NA	NA	NA	NA	NA	NA	6000	NA	NA	NA	NA	NA	NA	NA	NA	NA	NA	NA	NA	NA	0	1354.54	1354.54	NA	NA	NA
N5.2b	N5.2	Styela	0	Manual	DQ	Unknown	Unknown	ddPCR Supermix for Probes (no dUTP)	HEX	0	NA	NA	0.168457	0	20925	0	20925	0	0	0	0	NA	NA	NA	NA	NA	NA	NA	NA	6000	NA	NA	NA	NA	NA	NA	NA	NA	NA	NA	NA	NA	NA	0	1360.5	1360.5	NA	NA	NA
N5.3a	N5.3	Styela	0	Manual	DQ	Unknown	Unknown	ddPCR Supermix for Probes (no dUTP)	HEX	0	NA	NA	0.178128	0	19789	0	19789	0	0	0	0	NA	NA	NA	NA	NA	NA	NA	NA	6000	NA	NA	NA	NA	NA	NA	NA	NA	NA	NA	NA	NA	NA	0	1353.81	1353.81	NA	NA	NA
N5.3b	N5.3	Styela	0	Manual	DQ	Unknown	Unknown	ddPCR Supermix for Probes (no dUTP)	HEX	0	NA	NA	0.169632	0	20780	0	20780	0	0	0	0	NA	NA	NA	NA	NA	NA	NA	NA	6000	NA	NA	NA	NA	NA	NA	NA	NA	NA	NA	NA	NA	NA	0	1354.39	1354.39	NA	NA	NA
D5.1a	D5.1	Styela	0	Manual	DQ	Unknown	Unknown	ddPCR Supermix for Probes (no dUTP)	HEX	0	NA	NA	0.186172	0	18934	0	18934	0	0	0	0	NA	NA	NA	NA	NA	NA	NA	NA	6000	NA	NA	NA	NA	NA	NA	NA	NA	NA	NA	NA	NA	NA	0	1368.66	1368.66	NA	NA	NA
D5.1b	D5.1	Styela	0	Manual	DQ	Unknown	Unknown	ddPCR Supermix for Probes (no dUTP)	HEX	0	NA	NA	0.172345	0	20453	0	20453	0	0	0	0	NA	NA	NA	NA	NA	NA	NA	NA	6000	NA	NA	NA	NA	NA	NA	NA	NA	NA	NA	NA	NA	NA	0	1365.22	1365.22	NA	NA	NA
D5.2a	D5.2	Styela	0	Manual	DQ	Unknown	Unknown	ddPCR Supermix for Probes (no dUTP)	HEX	0	NA	NA	0.181065	0	19468	0	19468	0	0	0	0	NA	NA	NA	NA	NA	NA	NA	NA	6000	NA	NA	NA	NA	NA	NA	NA	NA	NA	NA	NA	NA	NA	0	1362.66	1362.66	NA	NA	NA
D5.2b	D5.2	Styela	0	Manual	DQ	Unknown	Unknown	ddPCR Supermix for Probes (no dUTP)	HEX	0	NA	NA	0.175284	0	20110	0	20110	0	0	0	0	NA	NA	NA	NA	NA	NA	NA	NA	6000	NA	NA	NA	NA	NA	NA	NA	NA	NA	NA	NA	NA	NA	0	1362.08	1362.08	NA	NA	NA
D5.3a	D5.3	Styela	0	Manual	DQ	Unknown	Unknown	ddPCR Supermix for Probes (no dUTP)	HEX	0	NA	NA	0.185613	0	18991	0	18991	0	0	0	0	NA	NA	NA	NA	NA	NA	NA	NA	6000	NA	NA	NA	NA	NA	NA	NA	NA	NA	NA	NA	NA	NA	0	1365.76	1365.76	NA	NA	NA
D5.3b	D5.3	Styela	0	Manual	DQ	Unknown	Unknown	ddPCR Supermix for Probes (no dUTP)	HEX	0	NA	NA	0.177867	0	19818	0	19818	0	0	0	0	NA	NA	NA	NA	NA	NA	NA	NA	6000	NA	NA	NA	NA	NA	NA	NA	NA	NA	NA	NA	NA	NA	0	1376.31	1376.31	NA	NA	NA
N6.1a	N6.1	Styela	0	Manual	DQ	Unknown	Unknown	ddPCR Supermix for Probes (no dUTP)	HEX	0	NA	NA	0.163951	0	21500	0	21500	0	0	0	0	NA	NA	NA	NA	NA	NA	NA	NA	6000	NA	NA	NA	NA	NA	NA	NA	NA	NA	NA	NA	NA	NA	0	1347.61	1347.61	NA	NA	NA
N6.1b	N6.1	Styela	0	Manual	DQ	Unknown	Unknown	ddPCR Supermix for Probes (no dUTP)	HEX	0	NA	NA	0.165312	0	21323	0	21323	0	0	0	0	NA	NA	NA	NA	NA	NA	NA	NA	6000	NA	NA	NA	NA	NA	NA	NA	NA	NA	NA	NA	NA	NA	0	1381.56	1381.56	NA	NA	NA
N6.2a	N6.2	Styela	0	Manual	DQ	Unknown	Unknown	ddPCR Supermix for Probes (no dUTP)	HEX	0	NA	NA	0.169047	0	20852	0	20852	0	0	0	0	NA	NA	NA	NA	NA	NA	NA	NA	6000	NA	NA	NA	NA	NA	NA	NA	NA	NA	NA	NA	NA	NA	0	1403.44	1403.44	NA	NA	NA
N6.2b	N6.2	Styela	0	Manual	DQ	Unknown	Unknown	ddPCR Supermix for Probes (no dUTP)	HEX	0	NA	NA	0.168779	0	20885	0	20885	0	0	0	0	NA	NA	NA	NA	NA	NA	NA	NA	6000	NA	NA	NA	NA	NA	NA	NA	NA	NA	NA	NA	NA	NA	0	1396.43	1396.43	NA	NA	NA
N6.3a	N6.3	Styela	0	Manual	DQ	Unknown	Unknown	ddPCR Supermix for Probes (no dUTP)	HEX	0	NA	NA	0.173396	0	20329	0	20329	0	0	0	0	NA	NA	NA	NA	NA	NA	NA	NA	6000	NA	NA	NA	NA	NA	NA	NA	NA	NA	NA	NA	NA	NA	0	1382.18	1382.18	NA	NA	NA
N6.3b	N6.3	Styela	0.0573902	Manual	DQ	Unknown	Unknown	ddPCR Supermix for Probes (no dUTP)	HEX	1.1478	NA	NA	0.274121	0.00241033	20500	1	20499	0	0	0	0	NA	NA	NA	NA	NA	NA	NA	NA	6000	NA	NA	NA	NA	NA	NA	NA	NA	NA	NA	NA	NA	NA	7253.82	1388.97	1389.26	NA	NA	NA
D6.1a	D6.1	Styela	0.0574631	Manual	DQ	Unknown	Unknown	ddPCR Supermix for Probes (no dUTP)	HEX	1.14926	NA	NA	0.274469	0.00241339	20474	1	20473	0	0	0	0	NA	NA	NA	NA	NA	NA	NA	NA	6000	NA	NA	NA	NA	NA	NA	NA	NA	NA	NA	NA	NA	NA	6323.83	1383.37	1383.61	NA	NA	NA
D6.1b	D6.1	Styela	0.11828	Manual	DQ	Unknown	Unknown	ddPCR Supermix for Probes (no dUTP)	HEX	2.3656	NA	NA	0.378892	0.0179186	19894	2	19892	0	0	0	0	NA	NA	NA	NA	NA	NA	NA	NA	6000	NA	NA	NA	NA	NA	NA	NA	NA	NA	NA	NA	NA	NA	6481.17	1403.02	1403.53	NA	NA	NA
D6.2a	D6.2	Styela	0	Manual	DQ	Unknown	Unknown	ddPCR Supermix for Probes (no dUTP)	HEX	0	NA	NA	0.166759	0	21138	0	21138	0	0	0	0	NA	NA	NA	NA	NA	NA	NA	NA	6000	NA	NA	NA	NA	NA	NA	NA	NA	NA	NA	NA	NA	NA	0	1469.72	1469.72	NA	NA	NA
D6.2b	D6.2	Styela	0.108983	Manual	DQ	Unknown	Unknown	ddPCR Supermix for Probes (no dUTP)	HEX	2.17966	NA	NA	0.349108	0.0165103	21591	2	21589	0	0	0	0	NA	NA	NA	NA	NA	NA	NA	NA	6000	NA	NA	NA	NA	NA	NA	NA	NA	NA	NA	NA	NA	NA	6931.83	1424.3	1424.81	NA	NA	NA
D6.3a	D6.3	Styela	0	Manual	DQ	Unknown	Unknown	ddPCR Supermix for Probes (no dUTP)	HEX	0	NA	NA	0.17857	0	19740	0	19740	0	0	0	0	NA	NA	NA	NA	NA	NA	NA	NA	6000	NA	NA	NA	NA	NA	NA	NA	NA	NA	NA	NA	NA	NA	0	1411.24	1411.24	NA	NA	NA
D6.3b	D6.3	Styela	0.233427	Manual	DQ	Unknown	Unknown	ddPCR Supermix for Probes (no dUTP)	HEX	4.66853	NA	NA	0.550436	0.0704316	20162	4	20158	0	0	0	0	NA	NA	NA	NA	NA	NA	NA	NA	6000	NA	NA	NA	NA	NA	NA	NA	NA	NA	NA	NA	NA	NA	7011.05	1454.12	1455.23	NA	NA	NA
(A12 1.1) A02.1a	A12 1.1	Styela	0.0594673	Manual	DQ	Unknown	Unknown	ddPCR Supermix for Probes (no dUTP)	HEX	1.18935	NA	NA	0.284043	0.00249757	19784	1	19783	0	0	0	0	NA	NA	NA	NA	NA	NA	NA	NA	6000	NA	NA	NA	NA	NA	NA	NA	NA	NA	NA	NA	NA	NA	7046.39	1456.36	1456.64	NA	NA	NA
(A12 1.1) A02.1b	A12 1.1	Styela	0.0558482	Manual	DQ	Unknown	Unknown	ddPCR Supermix for Probes (no dUTP)	HEX	1.11696	NA	NA	0.266755	0.00234557	21066	1	21065	0	0	0	0	NA	NA	NA	NA	NA	NA	NA	NA	6000	NA	NA	NA	NA	NA	NA	NA	NA	NA	NA	NA	NA	NA	6631.13	1413.88	1414.13	NA	NA	NA
(A12 1.2) A02.2a	A12 1.2	Styela	0	Manual	DQ	Unknown	Unknown	ddPCR Supermix for Probes (no dUTP)	HEX	0	NA	NA	0.177295	0	19882	0	19882	0	0	0	0	NA	NA	NA	NA	NA	NA	NA	NA	6000	NA	NA	NA	NA	NA	NA	NA	NA	NA	NA	NA	NA	NA	0	1375.08	1375.08	NA	NA	NA
(A12 1.2) A02.2b	A12 1.2	Styela	0	Manual	DQ	Unknown	Unknown	ddPCR Supermix for Probes (no dUTP)	HEX	0	NA	NA	0.172725	0	20408	0	20408	0	0	0	0	NA	NA	NA	NA	NA	NA	NA	NA	6000	NA	NA	NA	NA	NA	NA	NA	NA	NA	NA	NA	NA	NA	0	1396.22	1396.22	NA	NA	NA
(A12 1.3) A02.3a	A12 1.3	Styela	0.0569099	Manual	DQ	Unknown	Unknown	ddPCR Supermix for Probes (no dUTP)	HEX	1.1382	NA	NA	0.271827	0.00239016	20673	1	20672	0	0	0	0	NA	NA	NA	NA	NA	NA	NA	NA	6000	NA	NA	NA	NA	NA	NA	NA	NA	NA	NA	NA	NA	NA	6547.83	1448.07	1448.31	NA	NA	NA
(A12 1.3) A02.3b	A12 1.3	Styela	0	Manual	DQ	Unknown	Unknown	ddPCR Supermix for Probes (no dUTP)	HEX	0	NA	NA	0.175686	0	20064	0	20064	0	0	0	0	NA	NA	NA	NA	NA	NA	NA	NA	6000	NA	NA	NA	NA	NA	NA	NA	NA	NA	NA	NA	NA	NA	0	1419.31	1419.31	NA	NA	NA
Whole sponge 6.2B	Whole sponge 6.2	Styela	0.1281	Manual	DQ	Unknown	Unknown	ddPCR Supermix for Probes (no dUTP)	HEX	2.562	NA	NA	0.410354	0.0194063	18369	2	18367	0	0	0	0	NA	NA	NA	NA	NA	NA	NA	NA	6000	NA	NA	NA	NA	NA	NA	NA	NA	NA	NA	NA	NA	NA	7220.77	1422.06	1422.69	NA	NA	NA
Whole sponge 6.2P	Whole sponge 6.2	Styela	0	Manual	DQ	Unknown	Unknown	ddPCR Supermix for Probes (no dUTP)	HEX	0	NA	NA	0.188321	0	18718	0	18718	0	0	0	0	NA	NA	NA	NA	NA	NA	NA	NA	6000	NA	NA	NA	NA	NA	NA	NA	NA	NA	NA	NA	NA	NA	0	1368.45	1368.45	NA	NA	NA
Blank Da	Blank Da	Styela	0	Manual	DQ	Unknown	Unknown	ddPCR Supermix for Probes (no dUTP)	HEX	0	NA	NA	0.174928	0	20151	0	20151	0	0	0	0	NA	NA	NA	NA	NA	NA	NA	NA	6000	NA	NA	NA	NA	NA	NA	NA	NA	NA	NA	NA	NA	NA	0	1379.19	1379.19	NA	NA	NA
Blank Db	Blank Db	Styela	0	Manual	DQ	Unknown	Unknown	ddPCR Supermix for Probes (no dUTP)	HEX	0	NA	NA	0.171656	0	20535	0	20535	0	0	0	0	NA	NA	NA	NA	NA	NA	NA	NA	6000	NA	NA	NA	NA	NA	NA	NA	NA	NA	NA	NA	NA	NA	0	1443.27	1443.27	NA	NA	NA
Blank Ma	Blank Ma	Styela	0	Manual	DQ	Unknown	Unknown	ddPCR Supermix for Probes (no dUTP)	HEX	0	NA	NA	0.176947	0	19921	0	19921	0	0	0	0	NA	NA	NA	NA	NA	NA	NA	NA	6000	NA	NA	NA	NA	NA	NA	NA	NA	NA	NA	NA	NA	NA	0	1480.64	1480.64	NA	NA	NA
Blank Mb	Blank Mb	Styela	0	Manual	DQ	Unknown	Unknown	ddPCR Supermix for Probes (no dUTP)	HEX	0	NA	NA	0.175669	0	20066	0	20066	0	0	0	0	NA	NA	NA	NA	NA	NA	NA	NA	6000	NA	NA	NA	NA	NA	NA	NA	NA	NA	NA	NA	NA	NA	0	1427.46	1427.46	NA	NA	NA
Blank Na	Blank Na	Styela	0	Manual	DQ	Unknown	Unknown	ddPCR Supermix for Probes (no dUTP)	HEX	0	NA	NA	0.174029	0	20255	0	20255	0	0	0	0	NA	NA	NA	NA	NA	NA	NA	NA	6000	NA	NA	NA	NA	NA	NA	NA	NA	NA	NA	NA	NA	NA	0	1445.14	1445.14	NA	NA	NA
Blank Nb	Blank Nb	Styela	0	Manual	DQ	Unknown	Unknown	ddPCR Supermix for Probes (no dUTP)	HEX	0	NA	NA	0.164771	0	21393	0	21393	0	0	0	0	NA	NA	NA	NA	NA	NA	NA	NA	6000	NA	NA	NA	NA	NA	NA	NA	NA	NA	NA	NA	NA	NA	0	1434.79	1434.79	NA	NA	NA
Blank 5	Blank 5	Styela	0	Manual	DQ	Unknown	Unknown	ddPCR Supermix for Probes (no dUTP)	HEX	0	NA	NA	1.21103	0	2912	0	2912	0	0	0	0	NA	NA	NA	NA	NA	NA	NA	NA	6000	NA	NA	NA	NA	NA	NA	NA	NA	NA	NA	NA	NA	NA	0	1148.04	1148.04	NA	NA	NA
M6.1a	M6.1	Styela	0.370037	Manual	DQ	Unknown	Unknown	ddPCR Supermix for Probes (no dUTP)	HEX	7.40074	NA	NA	0.75648	0.144917	19079	6	19073	0	0	0	0	NA	NA	NA	NA	NA	NA	NA	NA	6000	NA	NA	NA	NA	NA	NA	NA	NA	NA	NA	NA	NA	NA	7114.12	1481.34	1483.11	NA	NA	NA
M6.1b	M6.1	Styela	0.388877	Manual	DQ	Unknown	Unknown	ddPCR Supermix for Probes (no dUTP)	HEX	7.77755	NA	NA	0.845194	0.136715	15129	5	15124	0	0	0	0	NA	NA	NA	NA	NA	NA	NA	NA	6000	NA	NA	NA	NA	NA	NA	NA	NA	NA	NA	NA	NA	NA	6820.27	1362.53	1364.33	NA	NA	NA
M6.2a	M6.2	Styela	0.0574659	Manual	DQ	Unknown	Unknown	ddPCR Supermix for Probes (no dUTP)	HEX	1.14932	NA	NA	0.274482	0.00241351	20473	1	20472	0	0	0	0	NA	NA	NA	NA	NA	NA	NA	NA	6000	NA	NA	NA	NA	NA	NA	NA	NA	NA	NA	NA	NA	NA	7629.48	1440.94	1441.24	NA	NA	NA
M6.2b	M6.2	Styela	0.234649	Manual	DQ	Unknown	Unknown	ddPCR Supermix for Probes (no dUTP)	HEX	4.69298	NA	NA	0.553318	0.0708004	20057	4	20053	0	0	0	0	NA	NA	NA	NA	NA	NA	NA	NA	6000	NA	NA	NA	NA	NA	NA	NA	NA	NA	NA	NA	NA	NA	6880.27	1468.9	1469.98	NA	NA	NA
M6.3a	M6.3	Styela	0.0566033	Manual	DQ	Unknown	Unknown	ddPCR Supermix for Probes (no dUTP)	HEX	1.13207	NA	NA	0.270362	0.00237728	20785	1	20784	0	0	0	0	NA	NA	NA	NA	NA	NA	NA	NA	6000	NA	NA	NA	NA	NA	NA	NA	NA	NA	NA	NA	NA	NA	7049.6	1474.53	1474.8	NA	NA	NA
M6.3b	M6.3	Styela	0.0623147	Manual	DQ	Unknown	Unknown	ddPCR Supermix for Probes (no dUTP)	HEX	1.24629	NA	NA	0.297645	0.00261715	18880	1	18879	0	0	0	0	NA	NA	NA	NA	NA	NA	NA	NA	6000	NA	NA	NA	NA	NA	NA	NA	NA	NA	NA	NA	NA	NA	7064.1	1490.94	1491.24	NA	NA	NA
S6.1a	S6.1	Styela	0.0589399	Manual	DQ	Unknown	Unknown	ddPCR Supermix for Probes (no dUTP)	HEX	1.1788	NA	NA	0.281524	0.00247542	19961	1	19960	0	0	0	0	NA	NA	NA	NA	NA	NA	NA	NA	6000	NA	NA	NA	NA	NA	NA	NA	NA	NA	NA	NA	NA	NA	6313.49	1456.27	1456.51	NA	NA	NA
S6.1b	S6.1	Styela	0	Manual	DQ	Unknown	Unknown	ddPCR Supermix for Probes (no dUTP)	HEX	0	NA	NA	0.177688	0	19838	0	19838	0	0	0	0	NA	NA	NA	NA	NA	NA	NA	NA	6000	NA	NA	NA	NA	NA	NA	NA	NA	NA	NA	NA	NA	NA	0	1432.22	1432.22	NA	NA	NA
S6.2a	S6.2	Styela	0	Manual	DQ	Unknown	Unknown	ddPCR Supermix for Probes (no dUTP)	HEX	0	NA	NA	0.184864	0	19068	0	19068	0	0	0	0	NA	NA	NA	NA	NA	NA	NA	NA	6000	NA	NA	NA	NA	NA	NA	NA	NA	NA	NA	NA	NA	NA	0	1436.55	1436.55	NA	NA	NA
S6.2b	S6.2	Styela	0	Manual	DQ	Unknown	Unknown	ddPCR Supermix for Probes (no dUTP)	HEX	0	NA	NA	0.171782	0	20520	0	20520	0	0	0	0	NA	NA	NA	NA	NA	NA	NA	NA	6000	NA	NA	NA	NA	NA	NA	NA	NA	NA	NA	NA	NA	NA	0	1435.36	1435.36	NA	NA	NA
S6.3a	S6.3	Styela	0	Manual	DQ	Unknown	Unknown	ddPCR Supermix for Probes (no dUTP)	HEX	0	NA	NA	0.173328	0	20337	0	20337	0	0	0	0	NA	NA	NA	NA	NA	NA	NA	NA	6000	NA	NA	NA	NA	NA	NA	NA	NA	NA	NA	NA	NA	NA	0	1414.72	1414.72	NA	NA	NA
S6.3b	S6.3	Styela	0	Manual	DQ	Unknown	Unknown	ddPCR Supermix for Probes (no dUTP)	HEX	0	NA	NA	0.169428	0	20805	0	20805	0	0	0	0	NA	NA	NA	NA	NA	NA	NA	NA	6000	NA	NA	NA	NA	NA	NA	NA	NA	NA	NA	NA	NA	NA	0	1500.08	1500.08	NA	NA	NA
(Blank A) Labelled Blank Buffer??a	(Blank A) Labelled Blank Buffer??a	Styela	0	Manual	DQ	Unknown	Unknown	ddPCR Supermix for Probes (no dUTP)	HEX	0	NA	NA	0.17857	0	19740	0	19740	0	0	0	0	NA	NA	NA	NA	NA	NA	NA	NA	6000	NA	NA	NA	NA	NA	NA	NA	NA	NA	NA	NA	NA	NA	0	1421.29	1421.29	NA	NA	NA
(Blank A) Labelled Blank Buffer??b	(Blank A) Labelled Blank Buffer??b	Styela	0	Manual	DQ	Unknown	Unknown	ddPCR Supermix for Probes (no dUTP)	HEX	0	NA	NA	0.17051	0	20673	0	20673	0	0	0	0	NA	NA	NA	NA	NA	NA	NA	NA	6000	NA	NA	NA	NA	NA	NA	NA	NA	NA	NA	NA	NA	NA	0	1484.04	1484.04	NA	NA	NA
Blank Whole Sponge a	Blank_Whole_Sponge_a_and_b	Styela	0	Manual	DQ	Unknown	Unknown	ddPCR Supermix for Probes (no dUTP)	HEX	0	NA	NA	0.172682	0	20413	0	20413	0	0	0	0	NA	NA	NA	NA	NA	NA	NA	NA	6000	NA	NA	NA	NA	NA	NA	NA	NA	NA	NA	NA	NA	NA	0	1476.8	1476.8	NA	NA	NA
Blank Whole Sponge b	Blank_Whole_Sponge_a_and_b	Styela	0	Manual	DQ	Unknown	Unknown	ddPCR Supermix for Probes (no dUTP)	HEX	0	NA	NA	0.174763	0	20170	0	20170	0	0	0	0	NA	NA	NA	NA	NA	NA	NA	NA	6000	NA	NA	NA	NA	NA	NA	NA	NA	NA	NA	NA	NA	NA	0	1464.68	1464.68	NA	NA	NA
Whole sponge WS1.1a	Whole sponge WS1.1	Styela	0	Manual	DQ	Unknown	Unknown	ddPCR Supermix for Probes (no dUTP)	HEX	0	NA	NA	0.180833	0	19493	0	19493	0	0	0	0	NA	NA	NA	NA	NA	NA	NA	NA	6000	NA	NA	NA	NA	NA	NA	NA	NA	NA	NA	NA	NA	NA	0	1455.02	1455.02	NA	NA	NA
Whole sponge WS 1.1b	Whole sponge WS 1.1	Styela	0	Manual	DQ	Unknown	Unknown	ddPCR Supermix for Probes (no dUTP)	HEX	0	NA	NA	0.168868	0	20874	0	20874	0	0	0	0	NA	NA	NA	NA	NA	NA	NA	NA	6000	NA	NA	NA	NA	NA	NA	NA	NA	NA	NA	NA	NA	NA	0	1451.06	1451.06	NA	NA	NA
Whole sponge WS1.2a	Whole sponge WS1.2	Styela	0	Manual	DQ	Unknown	Unknown	ddPCR Supermix for Probes (no dUTP)	HEX	0	NA	NA	0.180555	0	19523	0	19523	0	0	0	0	NA	NA	NA	NA	NA	NA	NA	NA	6000	NA	NA	NA	NA	NA	NA	NA	NA	NA	NA	NA	NA	NA	0	1372.76	1372.76	NA	NA	NA
Whole sponge WS1.2b	Whole sponge WS1.2	Styela	0	Manual	DQ	Unknown	Unknown	ddPCR Supermix for Probes (no dUTP)	HEX	0	NA	NA	0.186606	0	18890	0	18890	0	0	0	0	NA	NA	NA	NA	NA	NA	NA	NA	6000	NA	NA	NA	NA	NA	NA	NA	NA	NA	NA	NA	NA	NA	0	1420.29	1420.29	NA	NA	NA
Whole sponge WS1.3a	Whole sponge WS1.3	Styela	0	Manual	DQ	Unknown	Unknown	ddPCR Supermix for Probes (no dUTP)	HEX	0	NA	NA	0.170783	0	20640	0	20640	0	0	0	0	NA	NA	NA	NA	NA	NA	NA	NA	6000	NA	NA	NA	NA	NA	NA	NA	NA	NA	NA	NA	NA	NA	0	1405.71	1405.71	NA	NA	NA
Whole sponge WS1.3b	Whole sponge WS1.3	Styela	0	Manual	DQ	Unknown	Unknown	ddPCR Supermix for Probes (no dUTP)	HEX	0	NA	NA	0.182698	0	19294	0	19294	0	0	0	0	NA	NA	NA	NA	NA	NA	NA	NA	6000	NA	NA	NA	NA	NA	NA	NA	NA	NA	NA	NA	NA	NA	0	1436.83	1436.83	NA	NA	NA
Whole sponge WS2.1	Whole sponge WS2.1	Styela	0	Manual	DQ	Unknown	Unknown	ddPCR Supermix for Probes (no dUTP)	HEX	0	NA	NA	0.172496	0	20435	0	20435	0	0	0	0	NA	NA	NA	NA	NA	NA	NA	NA	6000	NA	NA	NA	NA	NA	NA	NA	NA	NA	NA	NA	NA	NA	0	1428.14	1428.14	NA	NA	NA
Whole sponge WS2.2	Whole sponge WS2.2	Styela	0	Manual	DQ	Unknown	Unknown	ddPCR Supermix for Probes (no dUTP)	HEX	0	NA	NA	0.185126	0	19041	0	19041	0	0	0	0	NA	NA	NA	NA	NA	NA	NA	NA	6000	NA	NA	NA	NA	NA	NA	NA	NA	NA	NA	NA	NA	NA	0	1458.63	1458.63	NA	NA	NA
Whole sponge WS2.3	Whole sponge WS2.3	Styela	0	Manual	DQ	Unknown	Unknown	ddPCR Supermix for Probes (no dUTP)	HEX	0	NA	NA	0.187849	0	18765	0	18765	0	0	0	0	NA	NA	NA	NA	NA	NA	NA	NA	6000	NA	NA	NA	NA	NA	NA	NA	NA	NA	NA	NA	NA	NA	0	1457.26	1457.26	NA	NA	NA
ddPCR Run 3 Styela Marsden cove passive samlpling	ddPCR Run 3 Styela Marsden cove passive samlpling	Styela	0	Manual	DQ	Unknown	Unknown	ddPCR Supermix for Probes (no dUTP)	HEX	0	NA	NA	0.184188	0	19138	0	19138	0	0	0	0	NA	NA	NA	NA	NA	NA	NA	NA	6000	NA	NA	NA	NA	NA	NA	NA	NA	NA	NA	NA	NA	NA	0	1425.04	1425.04	NA	NA	NA
Whole sponge WS3.2	Whole sponge WS3.2	Styela	0	Manual	DQ	Unknown	Unknown	ddPCR Supermix for Probes (no dUTP)	HEX	0	NA	NA	0.178924	0	19701	0	19701	0	0	0	0	NA	NA	NA	NA	NA	NA	NA	NA	6000	NA	NA	NA	NA	NA	NA	NA	NA	NA	NA	NA	NA	NA	0	1450.11	1450.11	NA	NA	NA
Whole sponge WS3.3	Whole sponge WS3.3	Styela	0	Manual	DQ	Unknown	Unknown	ddPCR Supermix for Probes (no dUTP)	HEX	0	NA	NA	0.201348	0	17507	0	17507	0	0	0	0	NA	NA	NA	NA	NA	NA	NA	NA	6000	NA	NA	NA	NA	NA	NA	NA	NA	NA	NA	NA	NA	NA	0	1481.67	1481.67	NA	NA	NA
Whole sponge WS4.1	Whole sponge WS4.1	Styela	0	Manual	DQ	Unknown	Unknown	ddPCR Supermix for Probes (no dUTP)	HEX	0	NA	NA	0.180389	0	19541	0	19541	0	0	0	0	NA	NA	NA	NA	NA	NA	NA	NA	6000	NA	NA	NA	NA	NA	NA	NA	NA	NA	NA	NA	NA	NA	0	1469.57	1469.57	NA	NA	NA
Whole sponge WS4.2	Whole sponge WS4.2	Styela	0	Manual	DQ	Unknown	Unknown	ddPCR Supermix for Probes (no dUTP)	HEX	0	NA	NA	0.190406	0	18513	0	18513	0	0	0	0	NA	NA	NA	NA	NA	NA	NA	NA	6000	NA	NA	NA	NA	NA	NA	NA	NA	NA	NA	NA	NA	NA	0	1398.3	1398.3	NA	NA	NA
Whole sponge WS4.3	Whole sponge WS4.3	Styela	0	Manual	DQ	Unknown	Unknown	ddPCR Supermix for Probes (no dUTP)	HEX	0	NA	NA	0.174815	0	20164	0	20164	0	0	0	0	NA	NA	NA	NA	NA	NA	NA	NA	6000	NA	NA	NA	NA	NA	NA	NA	NA	NA	NA	NA	NA	NA	0	1427.39	1427.39	NA	NA	NA
Whole sponge WS5.1	Whole sponge WS5.1	Styela	0	Manual	DQ	Unknown	Unknown	ddPCR Supermix for Probes (no dUTP)	HEX	0	NA	NA	0.180029	0	19580	0	19580	0	0	0	0	NA	NA	NA	NA	NA	NA	NA	NA	6000	NA	NA	NA	NA	NA	NA	NA	NA	NA	NA	NA	NA	NA	0	1426.14	1426.14	NA	NA	NA
Whole sponge WS5.2	Whole sponge WS5.2	Styela	0	Manual	DQ	Unknown	Unknown	ddPCR Supermix for Probes (no dUTP)	HEX	0	NA	NA	0.186054	0	18946	0	18946	0	0	0	0	NA	NA	NA	NA	NA	NA	NA	NA	6000	NA	NA	NA	NA	NA	NA	NA	NA	NA	NA	NA	NA	NA	0	1425.87	1425.87	NA	NA	NA
Whole sponge WS5.3	Whole sponge WS5.3	Styela	0	Manual	DQ	Unknown	Unknown	ddPCR Supermix for Probes (no dUTP)	HEX	0	NA	NA	0.173174	0	20355	0	20355	0	0	0	0	NA	NA	NA	NA	NA	NA	NA	NA	6000	NA	NA	NA	NA	NA	NA	NA	NA	NA	NA	NA	NA	NA	0	1469.35	1469.35	NA	NA	NA
Whole sponge WS6.1	Whole sponge WS6.1	Styela	0	Manual	DQ	Unknown	Unknown	ddPCR Supermix for Probes (no dUTP)	HEX	0	NA	NA	0.168095	0	20970	0	20970	0	0	0	0	NA	NA	NA	NA	NA	NA	NA	NA	6000	NA	NA	NA	NA	NA	NA	NA	NA	NA	NA	NA	NA	NA	0	1464.12	1464.12	NA	NA	NA
Whole sponge WS6.3	Whole sponge WS6.3	Styela	0.0547157	Manual	DQ	Unknown	Unknown	ddPCR Supermix for Probes (no dUTP)	HEX	1.09431	NA	NA	0.261345	0.00229801	21502	1	21501	0	0	0	0	NA	NA	NA	NA	NA	NA	NA	NA	6000	NA	NA	NA	NA	NA	NA	NA	NA	NA	NA	NA	NA	NA	6683.39	1484.18	1484.42	NA	NA	NA
Blank 6	Blank 6	Styela	0	Manual	DQ	Unknown	Unknown	ddPCR Supermix for Probes (no dUTP)	HEX	0	NA	NA	0.190757	0	18479	0	18479	0	0	0	0	NA	NA	NA	NA	NA	NA	NA	NA	6000	NA	NA	NA	NA	NA	NA	NA	NA	NA	NA	NA	NA	NA	0	1482.69	1482.69	NA	NA	NA
Negative	Negative	Styela	0	Manual	DQ	Unknown	Unknown	ddPCR Supermix for Probes (no dUTP)	HEX	0	NA	NA	0.167044	0	21102	0	21102	0	0	0	0	NA	NA	NA	NA	NA	NA	NA	NA	6000	NA	NA	NA	NA	NA	NA	NA	NA	NA	NA	NA	NA	NA	0	1488.33	1488.33	NA	NA	NA
Negative	Negative	Styela	0	Manual	DQ	Unknown	Unknown	ddPCR Supermix for Probes (no dUTP)	HEX	0	NA	NA	0.191909	0	18368	0	18368	0	0	0	0	NA	NA	NA	NA	NA	NA	NA	NA	6000	NA	NA	NA	NA	NA	NA	NA	NA	NA	NA	NA	NA	NA	0	1474.76	1474.76	NA	NA	NA
Negative	Negative	Styela	0	Manual	DQ	Unknown	Unknown	ddPCR Supermix for Probes (no dUTP)	HEX	0	NA	NA	0.184835	0	19071	0	19071	0	0	0	0	NA	NA	NA	NA	NA	NA	NA	NA	6000	NA	NA	NA	NA	NA	NA	NA	NA	NA	NA	NA	NA	NA	0	1472.24	1472.24	NA	NA	NA
Negative	Negative	Styela	0	Manual	DQ	Unknown	Unknown	ddPCR Supermix for Probes (no dUTP)	HEX	0	NA	NA	0.174477	0	20203	0	20203	0	0	0	0	NA	NA	NA	NA	NA	NA	NA	NA	6000	NA	NA	NA	NA	NA	NA	NA	NA	NA	NA	NA	NA	NA	0	1506.95	1506.95	NA	NA	NA
Positive 1:100	Positive 1:100	Styela	640.703	Manual	DQ	Unknown	Unknown	ddPCR Supermix for Probes (no dUTP)	HEX	12814.1	NA	NA	655.08	626.499	18851	7916	10935	0	0	0	0	NA	NA	NA	NA	NA	NA	NA	NA	6000	NA	NA	NA	NA	NA	NA	NA	NA	NA	NA	NA	NA	NA	7066.97	1513.23	3845.38	NA	NA	NA
ddPCR Run 3 Styela Marsden cove passive samlpling	ddPCR Run 3 Styela Marsden cove passive samlpling	Styela	NA	CHECK	DQ	Unknown	Unknown	ddPCR Supermix for Probes (no dUTP)	HEX	NA	NA	NA	NA	NA	0	0	0	0	0	0	0	NA	NA	NA	NA	NA	NA	NA	NA	NA	NA	NA	NA	NA	NA	NA	NA	NA	NA	NA	NA	NA	NA	0	0	0	NA	NA	NA
ddPCR Run 3 Styela Marsden cove passive samlpling	ddPCR Run 3 Styela Marsden cove passive samlpling	Styela	NA	CHECK	DQ	Unknown	Unknown	ddPCR Supermix for Probes (no dUTP)	HEX	NA	NA	NA	NA	NA	0	0	0	0	0	0	0	NA	NA	NA	NA	NA	NA	NA	NA	NA	NA	NA	NA	NA	NA	NA	NA	NA	NA	NA	NA	NA	NA	0	0	0	NA	NA	NA
ddPCR Run 3 Styela Marsden cove passive samlpling	ddPCR Run 3 Styela Marsden cove passive samlpling	Styela	NA	CHECK	DQ	Unknown	Unknown	ddPCR Supermix for Probes (no dUTP)	HEX	NA	NA	NA	NA	NA	0	0	0	0	0	0	0	NA	NA	NA	NA	NA	NA	NA	NA	NA	NA	NA	NA	NA	NA	NA	NA	NA	NA	NA	NA	NA	NA	0	0	0	NA	NA	NA
ddPCR Run 3 Styela Marsden cove passive samlpling	ddPCR Run 3 Styela Marsden cove passive samlpling	Styela	NA	CHECK	DQ	Unknown	Unknown	ddPCR Supermix for Probes (no dUTP)	HEX	NA	NA	NA	NA	NA	0	0	0	0	0	0	0	NA	NA	NA	NA	NA	NA	NA	NA	NA	NA	NA	NA	NA	NA	NA	NA	NA	NA	NA	NA	NA	NA	0	0	0	NA	NA	NA
ddPCR Run 3 Styela Marsden cove passive samlpling	ddPCR Run 3 Styela Marsden cove passive samlpling	Styela	NA	CHECK	DQ	Unknown	Unknown	ddPCR Supermix for Probes (no dUTP)	HEX	NA	NA	NA	NA	NA	0	0	0	0	0	0	0	NA	NA	NA	NA	NA	NA	NA	NA	NA	NA	NA	NA	NA	NA	NA	NA	NA	NA	NA	NA	NA	NA	0	0	0	NA	NA	NA
ddPCR Run 3 Styela Marsden cove passive samlpling	ddPCR Run 3 Styela Marsden cove passive samlpling	Styela	NA	CHECK	DQ	Unknown	Unknown	ddPCR Supermix for Probes (no dUTP)	HEX	NA	NA	NA	NA	NA	0	0	0	0	0	0	0	NA	NA	NA	NA	NA	NA	NA	NA	NA	NA	NA	NA	NA	NA	NA	NA	NA	NA	NA	NA	NA	NA	0	0	0	NA	NA	NA
ddPCR Run 3 Styela Marsden cove passive samlpling	ddPCR Run 3 Styela Marsden cove passive samlpling	Styela	NA	CHECK	DQ	Unknown	Unknown	ddPCR Supermix for Probes (no dUTP)	HEX	NA	NA	NA	NA	NA	0	0	0	0	0	0	0	NA	NA	NA	NA	NA	NA	NA	NA	NA	NA	NA	NA	NA	NA	NA	NA	NA	NA	NA	NA	NA	NA	0	0	0	NA	NA	NA
ddPCR Run 3 Styela Marsden cove passive samlpling	ddPCR Run 3 Styela Marsden cove passive samlpling	Styela	NA	CHECK	DQ	Unknown	Unknown	ddPCR Supermix for Probes (no dUTP)	HEX	NA	NA	NA	NA	NA	0	0	0	0	0	0	0	NA	NA	NA	NA	NA	NA	NA	NA	NA	NA	NA	NA	NA	NA	NA	NA	NA	NA	NA	NA	NA	NA	0	0	0	NA	NA	NA
[truncated: 15 more columns]

## Sheet: Bugula
sample	id	target	conc_copies_u_l	status	experiment	sample_type	target_type	supermix	dye_name_s	copies_20m_l_well	total_conf_max	total_conf_min	poisson_conf_max	poisson_conf_min	accepted_droplets	positives	negatives	ch1_ch2	ch1_ch2_2	ch1_ch2_3	ch1_ch2_4	linkage	cnv	total_cnv_max	total_cnv_min	poisson_cnv_max	poisson_cnv_min	reference_copies	unknown_copies	threshold1	threshold2	threshold3	reference_used	ratio	total_ratio_max	total_ratio_min	poisson_ratio_max	poisson_ratio_min	fractional_abundance	total_fractional_abundance_max	total_fractional_abundance_min	poisson_fractional_abundance_max	poisson_fractional_abundance_min	mean_amplitude_of_positives	mean_amplitude_of_negatives	mean_amplitude_total	experiment_comments	merged_wells	total_confidence_max68
S1.3	S1.3	Begula neritina	0	Manual	DQ	Unknown	Unknown	QX200 ddPCR EvaGreen Supermix	EvaGreen	0	NA	NA	0.176064	0	20021	0	20021	0	0	0	0	NA	NA	NA	NA	NA	NA	NA	NA	21700	NA	NA	NA	NA	NA	NA	NA	NA	NA	NA	NA	NA	NA	0	14541.7	14541.7	NA	NA	NA
M1.1	M1.1	Begula neritina	0.0567042	Manual	DQ	Unknown	Unknown	QX200 ddPCR EvaGreen Supermix	EvaGreen	1.13408	NA	NA	0.270844	0.00238152	20748	1	20747	0	0	0	0	NA	NA	NA	NA	NA	NA	NA	NA	21700	NA	NA	NA	NA	NA	NA	NA	NA	NA	NA	NA	NA	NA	23738.8	14374.2	14374.6	NA	NA	NA
M1.2	M1.2	Begula neritina	0.0577962	Manual	DQ	Unknown	Unknown	QX200 ddPCR EvaGreen Supermix	EvaGreen	1.15592	NA	NA	0.27606	0.00242738	20356	1	20355	0	0	0	0	NA	NA	NA	NA	NA	NA	NA	NA	21700	NA	NA	NA	NA	NA	NA	NA	NA	NA	NA	NA	NA	NA	22832	14351.7	14352.1	NA	NA	NA
M1.3	M1.3	Begula neritina	0.0578132	Manual	DQ	Unknown	Unknown	QX200 ddPCR EvaGreen Supermix	EvaGreen	1.15626	NA	NA	0.276142	0.0024281	20350	1	20349	0	0	0	0	NA	NA	NA	NA	NA	NA	NA	NA	21700	NA	NA	NA	NA	NA	NA	NA	NA	NA	NA	NA	NA	NA	21832.4	14460.3	14460.6	NA	NA	NA
N1.1	N1.1	Begula neritina	0.116241	Manual	DQ	Unknown	Unknown	QX200 ddPCR EvaGreen Supermix	EvaGreen	2.32481	NA	NA	0.372359	0.0176097	20243	2	20241	0	0	0	0	NA	NA	NA	NA	NA	NA	NA	NA	21700	NA	NA	NA	NA	NA	NA	NA	NA	NA	NA	NA	NA	NA	24424.6	14641.6	14642.6	NA	NA	NA
N1.2	N1.2	Begula neritina	0.110322	Manual	DQ	Unknown	Unknown	QX200 ddPCR EvaGreen Supermix	EvaGreen	2.20643	NA	NA	0.353397	0.0167131	21329	2	21327	0	0	0	0	NA	NA	NA	NA	NA	NA	NA	NA	21700	NA	NA	NA	NA	NA	NA	NA	NA	NA	NA	NA	NA	NA	22904.6	14208.6	14209.5	NA	NA	NA
N1.3	N1.3	Begula neritina	0.171277	Manual	DQ	Unknown	Unknown	QX200 ddPCR EvaGreen Supermix	EvaGreen	3.42553	NA	NA	0.453995	0.0406474	20608	3	20605	0	0	0	0	NA	NA	NA	NA	NA	NA	NA	NA	21700	NA	NA	NA	NA	NA	NA	NA	NA	NA	NA	NA	NA	NA	23168.2	14043.2	14044.5	NA	NA	NA
D1.1	D1.1	Begula neritina	0	Manual	DQ	Unknown	Unknown	QX200 ddPCR EvaGreen Supermix	EvaGreen	0	NA	NA	0.171398	0	20566	0	20566	0	0	0	0	NA	NA	NA	NA	NA	NA	NA	NA	21700	NA	NA	NA	NA	NA	NA	NA	NA	NA	NA	NA	NA	NA	0	14316.6	14316.6	NA	NA	NA
D1.2	D1.2	Begula neritina	0.057095	Manual	DQ	Unknown	Unknown	QX200 ddPCR EvaGreen Supermix	EvaGreen	1.1419	NA	NA	0.272711	0.00239793	20606	1	20605	0	0	0	0	NA	NA	NA	NA	NA	NA	NA	NA	21700	NA	NA	NA	NA	NA	NA	NA	NA	NA	NA	NA	NA	NA	26257.2	13977.3	13977.9	NA	NA	NA
Blank 1	Blank 1	Begula neritina	0.128051	Manual	DQ	Unknown	Unknown	QX200 ddPCR EvaGreen Supermix	EvaGreen	2.56102	NA	NA	0.410197	0.0193989	18376	2	18374	0	0	0	0	NA	NA	NA	NA	NA	NA	NA	NA	21700	NA	NA	NA	NA	NA	NA	NA	NA	NA	NA	NA	NA	NA	23895	13995.1	13996.2	NA	NA	NA
D1.3 a	D1.3	Begula neritina	0.064604	Manual	DQ	Unknown	Unknown	QX200 ddPCR EvaGreen Supermix	EvaGreen	1.29208	NA	NA	0.308581	0.0027133	18211	1	18210	0	0	0	0	NA	NA	NA	NA	NA	NA	NA	NA	21700	NA	NA	NA	NA	NA	NA	NA	NA	NA	NA	NA	NA	NA	23237.7	13971.3	13971.8	NA	NA	NA
D1.3 b	D1.3	Begula neritina	0	Manual	DQ	Unknown	Unknown	QX200 ddPCR EvaGreen Supermix	EvaGreen	0	NA	NA	0.173901	0	20270	0	20270	0	0	0	0	NA	NA	NA	NA	NA	NA	NA	NA	21700	NA	NA	NA	NA	NA	NA	NA	NA	NA	NA	NA	NA	NA	0	13694.5	13694.5	NA	NA	NA
S2.1 a	S2.1	Begula neritina	0.0571061	Manual	DQ	Unknown	Unknown	QX200 ddPCR EvaGreen Supermix	EvaGreen	1.14212	NA	NA	0.272764	0.0023984	20602	1	20601	0	0	0	0	NA	NA	NA	NA	NA	NA	NA	NA	21700	NA	NA	NA	NA	NA	NA	NA	NA	NA	NA	NA	NA	NA	31326.2	13640.8	13641.7	NA	NA	NA
S2.1 b	S2.1	Begula neritina	0.0569154	Manual	DQ	Unknown	Unknown	QX200 ddPCR EvaGreen Supermix	EvaGreen	1.13831	NA	NA	0.271853	0.00239039	20671	1	20670	0	0	0	0	NA	NA	NA	NA	NA	NA	NA	NA	21700	NA	NA	NA	NA	NA	NA	NA	NA	NA	NA	NA	NA	NA	34123.2	13587	13588	NA	NA	NA
S2.2 a	S2.2	Begula neritina	0	Manual	DQ	Unknown	Unknown	QX200 ddPCR EvaGreen Supermix	EvaGreen	0	NA	NA	0.184612	0	19094	0	19094	0	0	0	0	NA	NA	NA	NA	NA	NA	NA	NA	21700	NA	NA	NA	NA	NA	NA	NA	NA	NA	NA	NA	NA	NA	0	13403.9	13403.9	NA	NA	NA
S2.2 b	S2.2	Begula neritina	0	Manual	DQ	Unknown	Unknown	QX200 ddPCR EvaGreen Supermix	EvaGreen	0	NA	NA	0.16606	0	21227	0	21227	0	0	0	0	NA	NA	NA	NA	NA	NA	NA	NA	21700	NA	NA	NA	NA	NA	NA	NA	NA	NA	NA	NA	NA	NA	0	13345	13345	NA	NA	NA
S2.3 a	S2.3	Begula neritina	0.109465	Manual	DQ	Unknown	Unknown	QX200 ddPCR EvaGreen Supermix	EvaGreen	2.18929	NA	NA	0.350651	0.0165832	21496	2	21494	0	0	0	0	NA	NA	NA	NA	NA	NA	NA	NA	21700	NA	NA	NA	NA	NA	NA	NA	NA	NA	NA	NA	NA	NA	22437.1	13121.5	13122.3	NA	NA	NA
S2.3 b	S2.3	Begula neritina	0.054561	Manual	DQ	Unknown	Unknown	QX200 ddPCR EvaGreen Supermix	EvaGreen	1.09122	NA	NA	0.260606	0.00229151	21563	1	21562	0	0	0	0	NA	NA	NA	NA	NA	NA	NA	NA	21700	NA	NA	NA	NA	NA	NA	NA	NA	NA	NA	NA	NA	NA	22736	13001.1	13001.5	NA	NA	NA
M2.1 a	M2.1	Begula neritina	0.0530121	Manual	DQ	Unknown	Unknown	QX200 ddPCR EvaGreen Supermix	EvaGreen	1.06024	NA	NA	0.253207	0.00222646	22193	1	22192	0	0	0	0	NA	NA	NA	NA	NA	NA	NA	NA	21700	NA	NA	NA	NA	NA	NA	NA	NA	NA	NA	NA	NA	NA	28475.3	12885.7	12886.4	NA	NA	NA
M2.1 b	M2.1	Begula neritina	0	Manual	DQ	Unknown	Unknown	QX200 ddPCR EvaGreen Supermix	EvaGreen	0	NA	NA	0.16081	0	21920	0	21920	0	0	0	0	NA	NA	NA	NA	NA	NA	NA	NA	21700	NA	NA	NA	NA	NA	NA	NA	NA	NA	NA	NA	NA	NA	0	12906.3	12906.3	NA	NA	NA
M2.2 a	M2.2	Begula neritina	0.0535185	Manual	DQ	Unknown	Unknown	QX200 ddPCR EvaGreen Supermix	EvaGreen	1.07037	NA	NA	0.255626	0.00224773	21983	1	21982	0	0	0	0	NA	NA	NA	NA	NA	NA	NA	NA	21700	NA	NA	NA	NA	NA	NA	NA	NA	NA	NA	NA	NA	NA	24017	12932.6	12933.1	NA	NA	NA
M2.2 b	M2.2	Begula neritina	0	Manual	DQ	Unknown	Unknown	QX200 ddPCR EvaGreen Supermix	EvaGreen	0	NA	NA	0.166484	0	21173	0	21173	0	0	0	0	NA	NA	NA	NA	NA	NA	NA	NA	21700	NA	NA	NA	NA	NA	NA	NA	NA	NA	NA	NA	NA	NA	0	13027.6	13027.6	NA	NA	NA
M2.3 a	M2.3	Begula neritina	0	Manual	DQ	Unknown	Unknown	QX200 ddPCR EvaGreen Supermix	EvaGreen	0	NA	NA	0.163389	0	21574	0	21574	0	0	0	0	NA	NA	NA	NA	NA	NA	NA	NA	21700	NA	NA	NA	NA	NA	NA	NA	NA	NA	NA	NA	NA	NA	0	12790.1	12790.1	NA	NA	NA
M2.3 b	M2.3	Begula neritina	0.051061	Manual	DQ	Unknown	Unknown	QX200 ddPCR EvaGreen Supermix	EvaGreen	1.02122	NA	NA	0.243887	0.00214452	23041	1	23040	0	0	0	0	NA	NA	NA	NA	NA	NA	NA	NA	21700	NA	NA	NA	NA	NA	NA	NA	NA	NA	NA	NA	NA	NA	23583.6	12411.4	12411.9	NA	NA	NA
N2.1 a	N2.1	Begula neritina	0	Manual	DQ	Unknown	Unknown	QX200 ddPCR EvaGreen Supermix	EvaGreen	0	NA	NA	0.166091	0	21223	0	21223	0	0	0	0	NA	NA	NA	NA	NA	NA	NA	NA	21700	NA	NA	NA	NA	NA	NA	NA	NA	NA	NA	NA	NA	NA	0	12621.7	12621.7	NA	NA	NA
N2.1 b	N2.1	Begula neritina	0	Manual	DQ	Unknown	Unknown	QX200 ddPCR EvaGreen Supermix	EvaGreen	0	NA	NA	0.175311	0	20107	0	20107	0	0	0	0	NA	NA	NA	NA	NA	NA	NA	NA	21700	NA	NA	NA	NA	NA	NA	NA	NA	NA	NA	NA	NA	NA	0	12517.6	12517.6	NA	NA	NA
N2.2 a	N2.2	Begula neritina	0	Manual	DQ	Unknown	Unknown	QX200 ddPCR EvaGreen Supermix	EvaGreen	0	NA	NA	0.16942	0	20806	0	20806	0	0	0	0	NA	NA	NA	NA	NA	NA	NA	NA	21700	NA	NA	NA	NA	NA	NA	NA	NA	NA	NA	NA	NA	NA	0	12413.2	12413.2	NA	NA	NA
N2.2 b	N2.2	Begula neritina	0.0566796	Manual	DQ	Unknown	Unknown	QX200 ddPCR EvaGreen Supermix	EvaGreen	1.13359	NA	NA	0.270727	0.00238049	20757	1	20756	0	0	0	0	NA	NA	NA	NA	NA	NA	NA	NA	21700	NA	NA	NA	NA	NA	NA	NA	NA	NA	NA	NA	NA	NA	25157.1	12569.1	12569.7	NA	NA	NA
N2.3B	N2.3	Begula neritina	0.0580586	Manual	DQ	Unknown	Unknown	QX200 ddPCR EvaGreen Supermix	EvaGreen	1.16117	NA	NA	0.277314	0.0024384	20264	1	20263	0	0	0	0	NA	NA	NA	NA	NA	NA	NA	NA	21700	NA	NA	NA	NA	NA	NA	NA	NA	NA	NA	NA	NA	NA	39119	12458.3	12459.6	NA	NA	NA
N2.3P	N2.3	Begula neritina	0	Manual	DQ	Unknown	Unknown	QX200 ddPCR EvaGreen Supermix	EvaGreen	0	NA	NA	0.185457	0	19007	0	19007	0	0	0	0	NA	NA	NA	NA	NA	NA	NA	NA	21700	NA	NA	NA	NA	NA	NA	NA	NA	NA	NA	NA	NA	NA	0	12189.7	12189.7	NA	NA	NA
D2.1 a	D2.1	Begula neritina	0	Manual	DQ	Unknown	Unknown	QX200 ddPCR EvaGreen Supermix	EvaGreen	0	NA	NA	0.182471	0	19318	0	19318	0	0	0	0	NA	NA	NA	NA	NA	NA	NA	NA	21700	NA	NA	NA	NA	NA	NA	NA	NA	NA	NA	NA	NA	NA	0	12449.8	12449.8	NA	NA	NA
D2.1 b	D2.1	Begula neritina	0	Manual	DQ	Unknown	Unknown	QX200 ddPCR EvaGreen Supermix	EvaGreen	0	NA	NA	0.163616	0	21544	0	21544	0	0	0	0	NA	NA	NA	NA	NA	NA	NA	NA	21700	NA	NA	NA	NA	NA	NA	NA	NA	NA	NA	NA	NA	NA	0	12264.1	12264.1	NA	NA	NA
D2.2 a	D2.2	Begula neritina	0	Manual	DQ	Unknown	Unknown	QX200 ddPCR EvaGreen Supermix	EvaGreen	0	NA	NA	0.174737	0	20173	0	20173	0	0	0	0	NA	NA	NA	NA	NA	NA	NA	NA	21700	NA	NA	NA	NA	NA	NA	NA	NA	NA	NA	NA	NA	NA	0	12452.5	12452.5	NA	NA	NA
D2.2 b	D2.2	Begula neritina	0	Manual	DQ	Unknown	Unknown	QX200 ddPCR EvaGreen Supermix	EvaGreen	0	NA	NA	0.18734	0	18816	0	18816	0	0	0	0	NA	NA	NA	NA	NA	NA	NA	NA	21700	NA	NA	NA	NA	NA	NA	NA	NA	NA	NA	NA	NA	NA	0	12413.9	12413.9	NA	NA	NA
D2.3 a	D2.3	Begula neritina	0	Manual	DQ	Unknown	Unknown	QX200 ddPCR EvaGreen Supermix	EvaGreen	0	NA	NA	0.16764	0	21027	0	21027	0	0	0	0	NA	NA	NA	NA	NA	NA	NA	NA	21700	NA	NA	NA	NA	NA	NA	NA	NA	NA	NA	NA	NA	NA	0	12502.9	12502.9	NA	NA	NA
D2.3 b	D2.3	Begula neritina	0	Manual	DQ	Unknown	Unknown	QX200 ddPCR EvaGreen Supermix	EvaGreen	0	NA	NA	0.165849	0	21254	0	21254	0	0	0	0	NA	NA	NA	NA	NA	NA	NA	NA	21700	NA	NA	NA	NA	NA	NA	NA	NA	NA	NA	NA	NA	NA	0	12445.8	12445.8	NA	NA	NA
S3.1a	S3.1	Begula neritina	0	Manual	DQ	Unknown	Unknown	QX200 ddPCR EvaGreen Supermix	EvaGreen	0	NA	NA	0.178182	0	19783	0	19783	0	0	0	0	NA	NA	NA	NA	NA	NA	NA	NA	21700	NA	NA	NA	NA	NA	NA	NA	NA	NA	NA	NA	NA	NA	0	12527.6	12527.6	NA	NA	NA
S3.1b	S3.1	Begula neritina	0	Manual	DQ	Unknown	Unknown	QX200 ddPCR EvaGreen Supermix	EvaGreen	0	NA	NA	0.187091	0	18841	0	18841	0	0	0	0	NA	NA	NA	NA	NA	NA	NA	NA	21700	NA	NA	NA	NA	NA	NA	NA	NA	NA	NA	NA	NA	NA	0	12381.2	12381.2	NA	NA	NA
S3.2a	S3.2	Begula neritina	0	Manual	DQ	Unknown	Unknown	QX200 ddPCR EvaGreen Supermix	EvaGreen	0	NA	NA	0.188845	0	18666	0	18666	0	0	0	0	NA	NA	NA	NA	NA	NA	NA	NA	21700	NA	NA	NA	NA	NA	NA	NA	NA	NA	NA	NA	NA	NA	0	12210.7	12210.7	NA	NA	NA
S3.2b	S3.2	Begula neritina	0	Manual	DQ	Unknown	Unknown	QX200 ddPCR EvaGreen Supermix	EvaGreen	0	NA	NA	0.164918	0	21374	0	21374	0	0	0	0	NA	NA	NA	NA	NA	NA	NA	NA	21700	NA	NA	NA	NA	NA	NA	NA	NA	NA	NA	NA	NA	NA	0	12126.9	12126.9	NA	NA	NA
S3.3a	S3.3	Begula neritina	0	Manual	DQ	Unknown	Unknown	QX200 ddPCR EvaGreen Supermix	EvaGreen	0	NA	NA	0.163094	0	21613	0	21613	0	0	0	0	NA	NA	NA	NA	NA	NA	NA	NA	21700	NA	NA	NA	NA	NA	NA	NA	NA	NA	NA	NA	NA	NA	0	11813.1	11813.1	NA	NA	NA
S3.3b	S3.3	Begula neritina	0	Manual	DQ	Unknown	Unknown	QX200 ddPCR EvaGreen Supermix	EvaGreen	0	NA	NA	0.155297	0	22698	0	22698	0	0	0	0	NA	NA	NA	NA	NA	NA	NA	NA	21700	NA	NA	NA	NA	NA	NA	NA	NA	NA	NA	NA	NA	NA	0	12116.7	12116.7	NA	NA	NA
M3.1a	M3.1	Begula neritina	0.105489	Manual	DQ	Unknown	Unknown	QX200 ddPCR EvaGreen Supermix	EvaGreen	2.10979	NA	NA	0.337916	0.015981	22306	2	22304	0	0	0	0	NA	NA	NA	NA	NA	NA	NA	NA	21700	NA	NA	NA	NA	NA	NA	NA	NA	NA	NA	NA	NA	NA	23714.9	11937.5	11938.6	NA	NA	NA
M3.1b	M3.1	Begula neritina	0	Manual	DQ	Unknown	Unknown	QX200 ddPCR EvaGreen Supermix	EvaGreen	0	NA	NA	0.161643	0	21807	0	21807	0	0	0	0	NA	NA	NA	NA	NA	NA	NA	NA	21700	NA	NA	NA	NA	NA	NA	NA	NA	NA	NA	NA	NA	NA	0	12042	12042	NA	NA	NA
M3.2a	M3.2	Begula neritina	0	Manual	DQ	Unknown	Unknown	QX200 ddPCR EvaGreen Supermix	EvaGreen	0	NA	NA	0.156407	0	22537	0	22537	0	0	0	0	NA	NA	NA	NA	NA	NA	NA	NA	21700	NA	NA	NA	NA	NA	NA	NA	NA	NA	NA	NA	NA	NA	0	11888.4	11888.4	NA	NA	NA
M3.2b	M3.2	Begula neritina	0.107765	Manual	DQ	Unknown	Unknown	QX200 ddPCR EvaGreen Supermix	EvaGreen	2.1553	NA	NA	0.345206	0.0163258	21835	2	21833	0	0	0	0	NA	NA	NA	NA	NA	NA	NA	NA	21700	NA	NA	NA	NA	NA	NA	NA	NA	NA	NA	NA	NA	NA	26844.2	12011.1	12012.4	NA	NA	NA
M3.3a	M3.3	Begula neritina	0.0540496	Manual	DQ	Unknown	Unknown	QX200 ddPCR EvaGreen Supermix	EvaGreen	1.08099	NA	NA	0.258163	0.00227003	21767	1	21766	0	0	0	0	NA	NA	NA	NA	NA	NA	NA	NA	21700	NA	NA	NA	NA	NA	NA	NA	NA	NA	NA	NA	NA	NA	25622.1	12085.1	12085.7	NA	NA	NA
M3.3b	M3.3	Begula neritina	0	Manual	DQ	Unknown	Unknown	QX200 ddPCR EvaGreen Supermix	EvaGreen	0	NA	NA	0.16461	0	21414	0	21414	0	0	0	0	NA	NA	NA	NA	NA	NA	NA	NA	21700	NA	NA	NA	NA	NA	NA	NA	NA	NA	NA	NA	NA	NA	0	11826.9	11826.9	NA	NA	NA
Blank 2	Blank 2	Begula neritina	0	Manual	DQ	Unknown	Unknown	QX200 ddPCR EvaGreen Supermix	EvaGreen	0	NA	NA	0.159384	0	22116	0	22116	0	0	0	0	NA	NA	NA	NA	NA	NA	NA	NA	21700	NA	NA	NA	NA	NA	NA	NA	NA	NA	NA	NA	NA	NA	0	11995.9	11995.9	NA	NA	NA
N3.1a	N3.1	Begula neritina	0	Manual	DQ	Unknown	Unknown	QX200 ddPCR EvaGreen Supermix	EvaGreen	0	NA	NA	0.158624	0	22222	0	22222	0	0	0	0	NA	NA	NA	NA	NA	NA	NA	NA	21700	NA	NA	NA	NA	NA	NA	NA	NA	NA	NA	NA	NA	NA	0	11899.2	11899.2	NA	NA	NA
N3.1b	N3.1	Begula neritina	0	Manual	DQ	Unknown	Unknown	QX200 ddPCR EvaGreen Supermix	EvaGreen	0	NA	NA	0.159861	0	22050	0	22050	0	0	0	0	NA	NA	NA	NA	NA	NA	NA	NA	21700	NA	NA	NA	NA	NA	NA	NA	NA	NA	NA	NA	NA	NA	0	11965.8	11965.8	NA	NA	NA
N3.2a	N3.2	Begula neritina	0	Manual	DQ	Unknown	Unknown	QX200 ddPCR EvaGreen Supermix	EvaGreen	0	NA	NA	0.155215	0	22710	0	22710	0	0	0	0	NA	NA	NA	NA	NA	NA	NA	NA	21700	NA	NA	NA	NA	NA	NA	NA	NA	NA	NA	NA	NA	NA	0	12068.1	12068.1	NA	NA	NA
N3.2b	N3.2	Begula neritina	0.0550563	Manual	DQ	Unknown	Unknown	QX200 ddPCR EvaGreen Supermix	EvaGreen	1.10113	NA	NA	0.262972	0.00231231	21369	1	21368	0	0	0	0	NA	NA	NA	NA	NA	NA	NA	NA	21700	NA	NA	NA	NA	NA	NA	NA	NA	NA	NA	NA	NA	NA	22284.6	11952.5	11953	NA	NA	NA
N3.3a	N3.3	Begula neritina	0	Manual	DQ	Unknown	Unknown	QX200 ddPCR EvaGreen Supermix	EvaGreen	0	NA	NA	0.164794	0	21390	0	21390	0	0	0	0	NA	NA	NA	NA	NA	NA	NA	NA	21700	NA	NA	NA	NA	NA	NA	NA	NA	NA	NA	NA	NA	NA	0	11920.1	11920.1	NA	NA	NA
N3.3b	N3.3	Begula neritina	0	Manual	DQ	Unknown	Unknown	QX200 ddPCR EvaGreen Supermix	EvaGreen	0	NA	NA	0.167576	0	21035	0	21035	0	0	0	0	NA	NA	NA	NA	NA	NA	NA	NA	21700	NA	NA	NA	NA	NA	NA	NA	NA	NA	NA	NA	NA	NA	0	11892.9	11892.9	NA	NA	NA
D3.1a	D3.1	Begula neritina	0.0563619	Manual	DQ	Unknown	Unknown	QX200 ddPCR EvaGreen Supermix	EvaGreen	1.12724	NA	NA	0.269209	0.00236715	20874	1	20873	0	0	0	0	NA	NA	NA	NA	NA	NA	NA	NA	21700	NA	NA	NA	NA	NA	NA	NA	NA	NA	NA	NA	NA	NA	24980.2	11995.1	11995.7	NA	NA	NA
D3.1b	D3.1	Begula neritina	0	Manual	DQ	Unknown	Unknown	QX200 ddPCR EvaGreen Supermix	EvaGreen	0	NA	NA	0.166224	0	21206	0	21206	0	0	0	0	NA	NA	NA	NA	NA	NA	NA	NA	21700	NA	NA	NA	NA	NA	NA	NA	NA	NA	NA	NA	NA	NA	0	11949.2	11949.2	NA	NA	NA
D3.2a	D3.2	Begula neritina	0	Manual	DQ	Unknown	Unknown	QX200 ddPCR EvaGreen Supermix	EvaGreen	0	NA	NA	0.179736	0	19612	0	19612	0	0	0	0	NA	NA	NA	NA	NA	NA	NA	NA	21700	NA	NA	NA	NA	NA	NA	NA	NA	NA	NA	NA	NA	NA	0	11744.5	11744.5	NA	NA	NA
D3.2b	D3.2	Begula neritina	0	Manual	DQ	Unknown	Unknown	QX200 ddPCR EvaGreen Supermix	EvaGreen	0	NA	NA	0.168481	0	20922	0	20922	0	0	0	0	NA	NA	NA	NA	NA	NA	NA	NA	21700	NA	NA	NA	NA	NA	NA	NA	NA	NA	NA	NA	NA	NA	0	11694.2	11694.2	NA	NA	NA
D3.3B	D3.3	Begula neritina	0.0533801	Manual	DQ	Unknown	Unknown	QX200 ddPCR EvaGreen Supermix	EvaGreen	1.0676	NA	NA	0.254965	0.00224192	22040	1	22039	0	0	0	0	NA	NA	NA	NA	NA	NA	NA	NA	21700	NA	NA	NA	NA	NA	NA	NA	NA	NA	NA	NA	NA	NA	25286.8	11888.3	11888.9	NA	NA	NA
D3.3P	D3.3	Begula neritina	0	Manual	DQ	Unknown	Unknown	QX200 ddPCR EvaGreen Supermix	EvaGreen	0	NA	NA	0.175958	0	20033	0	20033	0	0	0	0	NA	NA	NA	NA	NA	NA	NA	NA	21700	NA	NA	NA	NA	NA	NA	NA	NA	NA	NA	NA	NA	NA	0	11807.2	11807.2	NA	NA	NA
S4.1a	S4.1	Begula neritina	0	Manual	DQ	Unknown	Unknown	QX200 ddPCR EvaGreen Supermix	EvaGreen	0	NA	NA	0.177491	0	19860	0	19860	0	0	0	0	NA	NA	NA	NA	NA	NA	NA	NA	21700	NA	NA	NA	NA	NA	NA	NA	NA	NA	NA	NA	NA	NA	0	11812.1	11812.1	NA	NA	NA
S4.1b	S4.1	Begula neritina	0	Manual	DQ	Unknown	Unknown	QX200 ddPCR EvaGreen Supermix	EvaGreen	0	NA	NA	0.179279	0	19662	0	19662	0	0	0	0	NA	NA	NA	NA	NA	NA	NA	NA	21700	NA	NA	NA	NA	NA	NA	NA	NA	NA	NA	NA	NA	NA	0	11876.3	11876.3	NA	NA	NA
S4.2a	S4.2	Begula neritina	0	Manual	DQ	Unknown	Unknown	QX200 ddPCR EvaGreen Supermix	EvaGreen	0	NA	NA	0.164356	0	21447	0	21447	0	0	0	0	NA	NA	NA	NA	NA	NA	NA	NA	21700	NA	NA	NA	NA	NA	NA	NA	NA	NA	NA	NA	NA	NA	0	11574.1	11574.1	NA	NA	NA
S4.2b	S4.2	Begula neritina	0	Manual	DQ	Unknown	Unknown	QX200 ddPCR EvaGreen Supermix	EvaGreen	0	NA	NA	0.160072	0	22021	0	22021	0	0	0	0	NA	NA	NA	NA	NA	NA	NA	NA	21700	NA	NA	NA	NA	NA	NA	NA	NA	NA	NA	NA	NA	NA	0	11778.3	11778.3	NA	NA	NA
S4.3a	S4.3	Begula neritina	0	Manual	DQ	Unknown	Unknown	QX200 ddPCR EvaGreen Supermix	EvaGreen	0	NA	NA	0.170181	0	20713	0	20713	0	0	0	0	NA	NA	NA	NA	NA	NA	NA	NA	21700	NA	NA	NA	NA	NA	NA	NA	NA	NA	NA	NA	NA	NA	0	11600.7	11600.7	NA	NA	NA
S4.3b	S4.3	Begula neritina	0.0537827	Manual	DQ	Unknown	Unknown	QX200 ddPCR EvaGreen Supermix	EvaGreen	1.07565	NA	NA	0.256889	0.00225883	21875	1	21874	0	0	0	0	NA	NA	NA	NA	NA	NA	NA	NA	21700	NA	NA	NA	NA	NA	NA	NA	NA	NA	NA	NA	NA	NA	25274.5	11831.7	11832.3	NA	NA	NA
M4.1a	M4.1	Begula neritina	0	Manual	DQ	Unknown	Unknown	QX200 ddPCR EvaGreen Supermix	EvaGreen	0	NA	NA	0.159695	0	22073	0	22073	0	0	0	0	NA	NA	NA	NA	NA	NA	NA	NA	21700	NA	NA	NA	NA	NA	NA	NA	NA	NA	NA	NA	NA	NA	0	11761.4	11761.4	NA	NA	NA
M4.1b	M4.1	Begula neritina	0	Manual	DQ	Unknown	Unknown	QX200 ddPCR EvaGreen Supermix	EvaGreen	0	NA	NA	0.161052	0	21887	0	21887	0	0	0	0	NA	NA	NA	NA	NA	NA	NA	NA	21700	NA	NA	NA	NA	NA	NA	NA	NA	NA	NA	NA	NA	NA	0	11585.6	11585.6	NA	NA	NA
M4.2a	M4.2	Begula neritina	0	Manual	DQ	Unknown	Unknown	QX200 ddPCR EvaGreen Supermix	EvaGreen	0	NA	NA	0.160269	0	21994	0	21994	0	0	0	0	NA	NA	NA	NA	NA	NA	NA	NA	21700	NA	NA	NA	NA	NA	NA	NA	NA	NA	NA	NA	NA	NA	0	11760.1	11760.1	NA	NA	NA
M4.2b	M4.2	Begula neritina	0	Manual	DQ	Unknown	Unknown	QX200 ddPCR EvaGreen Supermix	EvaGreen	0	NA	NA	0.160232	0	21999	0	21999	0	0	0	0	NA	NA	NA	NA	NA	NA	NA	NA	21700	NA	NA	NA	NA	NA	NA	NA	NA	NA	NA	NA	NA	NA	0	11658.7	11658.7	NA	NA	NA
M4.3a	M4.3	Begula neritina	0	Manual	DQ	Unknown	Unknown	QX200 ddPCR EvaGreen Supermix	EvaGreen	0	NA	NA	0.166491	0	21172	0	21172	0	0	0	0	NA	NA	NA	NA	NA	NA	NA	NA	21700	NA	NA	NA	NA	NA	NA	NA	NA	NA	NA	NA	NA	NA	0	11695.3	11695.3	NA	NA	NA
M4.3b	M4.3	Begula neritina	0	Manual	DQ	Unknown	Unknown	QX200 ddPCR EvaGreen Supermix	EvaGreen	0	NA	NA	0.159233	0	22137	0	22137	0	0	0	0	NA	NA	NA	NA	NA	NA	NA	NA	21700	NA	NA	NA	NA	NA	NA	NA	NA	NA	NA	NA	NA	NA	0	11619.2	11619.2	NA	NA	NA
N4.1a	N4.1	Begula neritina	0	Manual	DQ	Unknown	Unknown	QX200 ddPCR EvaGreen Supermix	EvaGreen	0	NA	NA	0.156706	0	22494	0	22494	0	0	0	0	NA	NA	NA	NA	NA	NA	NA	NA	21700	NA	NA	NA	NA	NA	NA	NA	NA	NA	NA	NA	NA	NA	0	11740.6	11740.6	NA	NA	NA
N4.1b	N4.1	Begula neritina	0	Manual	DQ	Unknown	Unknown	QX200 ddPCR EvaGreen Supermix	EvaGreen	0	NA	NA	0.166421	0	21181	0	21181	0	0	0	0	NA	NA	NA	NA	NA	NA	NA	NA	21700	NA	NA	NA	NA	NA	NA	NA	NA	NA	NA	NA	NA	NA	0	11706.1	11706.1	NA	NA	NA
N4.2a	N4.2	Begula neritina	0	Manual	DQ	Unknown	Unknown	QX200 ddPCR EvaGreen Supermix	EvaGreen	0	NA	NA	0.159738	0	22067	0	22067	0	0	0	0	NA	NA	NA	NA	NA	NA	NA	NA	21700	NA	NA	NA	NA	NA	NA	NA	NA	NA	NA	NA	NA	NA	0	11748.5	11748.5	NA	NA	NA
N4.2b	N4.2	Begula neritina	0	Manual	DQ	Unknown	Unknown	QX200 ddPCR EvaGreen Supermix	EvaGreen	0	NA	NA	0.158953	0	22176	0	22176	0	0	0	0	NA	NA	NA	NA	NA	NA	NA	NA	21700	NA	NA	NA	NA	NA	NA	NA	NA	NA	NA	NA	NA	NA	0	11628.2	11628.2	NA	NA	NA
N4.3a	N4.3	Begula neritina	0	Manual	DQ	Unknown	Unknown	QX200 ddPCR EvaGreen Supermix	EvaGreen	0	NA	NA	0.164242	0	21462	0	21462	0	0	0	0	NA	NA	NA	NA	NA	NA	NA	NA	21700	NA	NA	NA	NA	NA	NA	NA	NA	NA	NA	NA	NA	NA	0	11500	11500	NA	NA	NA
N4.3b	N4.3	Begula neritina	0	Manual	DQ	Unknown	Unknown	QX200 ddPCR EvaGreen Supermix	EvaGreen	0	NA	NA	0.164119	0	21478	0	21478	0	0	0	0	NA	NA	NA	NA	NA	NA	NA	NA	21700	NA	NA	NA	NA	NA	NA	NA	NA	NA	NA	NA	NA	NA	0	11431.2	11431.2	NA	NA	NA
D4.1a	D4.1	Begula neritina	0	Manual	DQ	Unknown	Unknown	QX200 ddPCR EvaGreen Supermix	EvaGreen	0	NA	NA	0.166523	0	21168	0	21168	0	0	0	0	NA	NA	NA	NA	NA	NA	NA	NA	21700	NA	NA	NA	NA	NA	NA	NA	NA	NA	NA	NA	NA	NA	0	11496.5	11496.5	NA	NA	NA
D4.1b	D4.1	Begula neritina	0	Manual	DQ	Unknown	Unknown	QX200 ddPCR EvaGreen Supermix	EvaGreen	0	NA	NA	0.17164	0	20537	0	20537	0	0	0	0	NA	NA	NA	NA	NA	NA	NA	NA	21700	NA	NA	NA	NA	NA	NA	NA	NA	NA	NA	NA	NA	NA	0	11389.9	11389.9	NA	NA	NA
D4.2a	D4.2	Begula neritina	0	Manual	DQ	Unknown	Unknown	QX200 ddPCR EvaGreen Supermix	EvaGreen	0	NA	NA	0.163245	0	21593	0	21593	0	0	0	0	NA	NA	NA	NA	NA	NA	NA	NA	21700	NA	NA	NA	NA	NA	NA	NA	NA	NA	NA	NA	NA	NA	0	11516	11516	NA	NA	NA
D4.2b	D4.2	Begula neritina	0	Manual	DQ	Unknown	Unknown	QX200 ddPCR EvaGreen Supermix	EvaGreen	0	NA	NA	0.174158	0	20240	0	20240	0	0	0	0	NA	NA	NA	NA	NA	NA	NA	NA	21700	NA	NA	NA	NA	NA	NA	NA	NA	NA	NA	NA	NA	NA	0	11502.9	11502.9	NA	NA	NA
D4.3a	D4.3	Begula neritina	0	Manual	DQ	Unknown	Unknown	QX200 ddPCR EvaGreen Supermix	EvaGreen	0	NA	NA	0.16882	0	20880	0	20880	0	0	0	0	NA	NA	NA	NA	NA	NA	NA	NA	21700	NA	NA	NA	NA	NA	NA	NA	NA	NA	NA	NA	NA	NA	0	11427.6	11427.6	NA	NA	NA
D4.3b	D4.3	Begula neritina	0.0552269	Manual	DQ	Unknown	Unknown	QX200 ddPCR EvaGreen Supermix	EvaGreen	1.10454	NA	NA	0.263787	0.00231948	21303	1	21302	0	0	0	0	NA	NA	NA	NA	NA	NA	NA	NA	21700	NA	NA	NA	NA	NA	NA	NA	NA	NA	NA	NA	NA	NA	33663.9	11594.5	11595.6	NA	NA	NA
S5.1B	S5.1	Begula neritina	0	Manual	DQ	Unknown	Unknown	QX200 ddPCR EvaGreen Supermix	EvaGreen	0	NA	NA	0.172033	0	20490	0	20490	0	0	0	0	NA	NA	NA	NA	NA	NA	NA	NA	21700	NA	NA	NA	NA	NA	NA	NA	NA	NA	NA	NA	NA	NA	0	11369.9	11369.9	NA	NA	NA
S5.1P	S5.1	Begula neritina	0	Manual	DQ	Unknown	Unknown	QX200 ddPCR EvaGreen Supermix	EvaGreen	0	NA	NA	0.171106	0	20601	0	20601	0	0	0	0	NA	NA	NA	NA	NA	NA	NA	NA	21700	NA	NA	NA	NA	NA	NA	NA	NA	NA	NA	NA	NA	NA	0	10752	10752	NA	NA	NA
S5.1a*	S5.1	Begula neritina	0.0550228	Manual	DQ	Unknown	Unknown	QX200 ddPCR EvaGreen Supermix	EvaGreen	1.10046	NA	NA	0.262812	0.00231091	21382	1	21381	0	0	0	0	NA	NA	NA	NA	NA	NA	NA	NA	21700	NA	NA	NA	NA	NA	NA	NA	NA	NA	NA	NA	NA	NA	31259.8	11528	11528.9	NA	NA	NA
S5.1b*	S5.1	Begula neritina	0	Manual	DQ	Unknown	Unknown	QX200 ddPCR EvaGreen Supermix	EvaGreen	0	NA	NA	0.171481	0	20556	0	20556	0	0	0	0	NA	NA	NA	NA	NA	NA	NA	NA	21700	NA	NA	NA	NA	NA	NA	NA	NA	NA	NA	NA	NA	NA	0	11499.6	11499.6	NA	NA	NA
S5.2a	S5.2	Begula neritina	0	Manual	DQ	Unknown	Unknown	QX200 ddPCR EvaGreen Supermix	EvaGreen	0	NA	NA	0.15742	0	22392	0	22392	0	0	0	0	NA	NA	NA	NA	NA	NA	NA	NA	21700	NA	NA	NA	NA	NA	NA	NA	NA	NA	NA	NA	NA	NA	0	11279.2	11279.2	NA	NA	NA
S5.2b	S5.2	Begula neritina	0	Manual	DQ	Unknown	Unknown	QX200 ddPCR EvaGreen Supermix	EvaGreen	0	NA	NA	0.158688	0	22213	0	22213	0	0	0	0	NA	NA	NA	NA	NA	NA	NA	NA	21700	NA	NA	NA	NA	NA	NA	NA	NA	NA	NA	NA	NA	NA	0	11185.3	11185.3	NA	NA	NA
S5.3a	S5.3	Begula neritina	0	Manual	DQ	Unknown	Unknown	QX200 ddPCR EvaGreen Supermix	EvaGreen	0	NA	NA	0.15871	0	22210	0	22210	0	0	0	0	NA	NA	NA	NA	NA	NA	NA	NA	21700	NA	NA	NA	NA	NA	NA	NA	NA	NA	NA	NA	NA	NA	0	11283.8	11283.8	NA	NA	NA
S5.3b	S5.3	Begula neritina	0.0535185	Manual	DQ	Unknown	Unknown	QX200 ddPCR EvaGreen Supermix	EvaGreen	1.07037	NA	NA	0.255626	0.00224773	21983	1	21982	0	0	0	0	NA	NA	NA	NA	NA	NA	NA	NA	21700	NA	NA	NA	NA	NA	NA	NA	NA	NA	NA	NA	NA	NA	35303.3	11366	11367.1	NA	NA	NA
Blank 3	Blank 3	Begula neritina	0.0545003	Manual	DQ	Unknown	Unknown	QX200 ddPCR EvaGreen Supermix	EvaGreen	1.09001	NA	NA	0.260316	0.00228896	21587	1	21586	0	0	0	0	NA	NA	NA	NA	NA	NA	NA	NA	21700	NA	NA	NA	NA	NA	NA	NA	NA	NA	NA	NA	NA	NA	26857.5	11381.3	11382	NA	NA	NA
Positive 1:100	Positive 1:100	Begula neritina	19.1913	Manual	DQ	Unknown	Unknown	QX200 ddPCR EvaGreen Supermix	EvaGreen	383.826	NA	NA	21.2452	17.141	20766	336	20430	0	0	0	0	NA	NA	NA	NA	NA	NA	NA	NA	21700	NA	NA	NA	NA	NA	NA	NA	NA	NA	NA	NA	NA	NA	26062.9	11776.5	12007.6	NA	NA	NA
Negative	Negative	Begula neritina	0.0626732	Manual	DQ	Unknown	Unknown	QX200 ddPCR EvaGreen Supermix	EvaGreen	1.25346	NA	NA	0.299357	0.00263221	18772	1	18771	0	0	0	0	NA	NA	NA	NA	NA	NA	NA	NA	21700	NA	NA	NA	NA	NA	NA	NA	NA	NA	NA	NA	NA	NA	30255	12997.9	12998.8	NA	NA	NA
Blank 4	Blank 4	Begula neritina	0.627247	Manual	DQ	Unknown	Unknown	QX200 ddPCR EvaGreen Supermix	EvaGreen	12.5449	NA	NA	1.13654	0.299085	16885	9	16876	0	0	0	0	NA	NA	NA	NA	NA	NA	NA	NA	21700	NA	NA	NA	NA	NA	NA	NA	NA	NA	NA	NA	NA	NA	22842	14505.5	14510	NA	NA	NA
M5.1a	M5.1	Begula neritina	0	Manual	DQ	Unknown	Unknown	QX200 ddPCR EvaGreen Supermix	EvaGreen	0	NA	NA	0.203605	0	17313	0	17313	0	0	0	0	NA	NA	NA	NA	NA	NA	NA	NA	21700	NA	NA	NA	NA	NA	NA	NA	NA	NA	NA	NA	NA	NA	0	14286.7	14286.7	NA	NA	NA
M5.1b	M5.1	Begula neritina	0	Manual	DQ	Unknown	Unknown	QX200 ddPCR EvaGreen Supermix	EvaGreen	0	NA	NA	0.187151	0	18835	0	18835	0	0	0	0	NA	NA	NA	NA	NA	NA	NA	NA	21700	NA	NA	NA	NA	NA	NA	NA	NA	NA	NA	NA	NA	NA	0	14096.9	14096.9	NA	NA	NA
M5.2T	M5.2	Begula neritina	0	Manual	DQ	Unknown	Unknown	QX200 ddPCR EvaGreen Supermix	EvaGreen	0	NA	NA	0.194097	0	18161	0	18161	0	0	0	0	NA	NA	NA	NA	NA	NA	NA	NA	21700	NA	NA	NA	NA	NA	NA	NA	NA	NA	NA	NA	NA	NA	0	14084.6	14084.6	NA	NA	NA
M5.2P	M5.2	Begula neritina	0.0639577	Manual	DQ	Unknown	Unknown	QX200 ddPCR EvaGreen Supermix	EvaGreen	1.27915	NA	NA	0.305494	0.00268615	18395	1	18394	0	0	0	0	NA	NA	NA	NA	NA	NA	NA	NA	21700	NA	NA	NA	NA	NA	NA	NA	NA	NA	NA	NA	NA	NA	28357.3	14039.1	14039.8	NA	NA	NA
M5.3a	M5.3	Begula neritina	0	Manual	DQ	Unknown	Unknown	QX200 ddPCR EvaGreen Supermix	EvaGreen	0	NA	NA	0.200924	0	17544	0	17544	0	0	0	0	NA	NA	NA	NA	NA	NA	NA	NA	21700	NA	NA	NA	NA	NA	NA	NA	NA	NA	NA	NA	NA	NA	0	13807.3	13807.3	NA	NA	NA
M5.3b	M5.3	Begula neritina	0	Manual	DQ	Unknown	Unknown	QX200 ddPCR EvaGreen Supermix	EvaGreen	0	NA	NA	0.185077	0	19046	0	19046	0	0	0	0	NA	NA	NA	NA	NA	NA	NA	NA	21700	NA	NA	NA	NA	NA	NA	NA	NA	NA	NA	NA	NA	NA	0	13806.1	13806.1	NA	NA	NA
N5.1a	N5.1	Begula neritina	0	Manual	DQ	Unknown	Unknown	QX200 ddPCR EvaGreen Supermix	EvaGreen	0	NA	NA	0.188442	0	18706	0	18706	0	0	0	0	NA	NA	NA	NA	NA	NA	NA	NA	21700	NA	NA	NA	NA	NA	NA	NA	NA	NA	NA	NA	NA	NA	0	13796.8	13796.8	NA	NA	NA
N5.1b	N5.1	Begula neritina	0	Manual	DQ	Unknown	Unknown	QX200 ddPCR EvaGreen Supermix	EvaGreen	0	NA	NA	0.16764	0	21027	0	21027	0	0	0	0	NA	NA	NA	NA	NA	NA	NA	NA	21700	NA	NA	NA	NA	NA	NA	NA	NA	NA	NA	NA	NA	NA	0	13737.7	13737.7	NA	NA	NA
N5.2a	N5.2	Begula neritina	0	Manual	DQ	Unknown	Unknown	QX200 ddPCR EvaGreen Supermix	EvaGreen	0	NA	NA	0.175136	0	20127	0	20127	0	0	0	0	NA	NA	NA	NA	NA	NA	NA	NA	21700	NA	NA	NA	NA	NA	NA	NA	NA	NA	NA	NA	NA	NA	0	13745.2	13745.2	NA	NA	NA
N5.2b	N5.2	Begula neritina	0	Manual	DQ	Unknown	Unknown	QX200 ddPCR EvaGreen Supermix	EvaGreen	0	NA	NA	0.178209	0	19780	0	19780	0	0	0	0	NA	NA	NA	NA	NA	NA	NA	NA	21700	NA	NA	NA	NA	NA	NA	NA	NA	NA	NA	NA	NA	NA	0	13678.6	13678.6	NA	NA	NA
N5.3a	N5.3	Begula neritina	0	Manual	DQ	Unknown	Unknown	QX200 ddPCR EvaGreen Supermix	EvaGreen	0	NA	NA	0.18468	0	19087	0	19087	0	0	0	0	NA	NA	NA	NA	NA	NA	NA	NA	21700	NA	NA	NA	NA	NA	NA	NA	NA	NA	NA	NA	NA	NA	0	13613	13613	NA	NA	NA
N5.3b	N5.3	Begula neritina	0	Manual	DQ	Unknown	Unknown	QX200 ddPCR EvaGreen Supermix	EvaGreen	0	NA	NA	0.184101	0	19147	0	19147	0	0	0	0	NA	NA	NA	NA	NA	NA	NA	NA	21700	NA	NA	NA	NA	NA	NA	NA	NA	NA	NA	NA	NA	NA	0	13353.3	13353.3	NA	NA	NA
D5.1a	D5.1	Begula neritina	0	Manual	DQ	Unknown	Unknown	QX200 ddPCR EvaGreen Supermix	EvaGreen	0	NA	NA	0.17742	0	19868	0	19868	0	0	0	0	NA	NA	NA	NA	NA	NA	NA	NA	21700	NA	NA	NA	NA	NA	NA	NA	NA	NA	NA	NA	NA	NA	0	13372.3	13372.3	NA	NA	NA
D5.1b	D5.1	Begula neritina	0	Manual	DQ	Unknown	Unknown	QX200 ddPCR EvaGreen Supermix	EvaGreen	0	NA	NA	0.176055	0	20022	0	20022	0	0	0	0	NA	NA	NA	NA	NA	NA	NA	NA	21700	NA	NA	NA	NA	NA	NA	NA	NA	NA	NA	NA	NA	NA	0	13195.5	13195.5	NA	NA	NA
D5.2a	D5.2	Begula neritina	0	Manual	DQ	Unknown	Unknown	QX200 ddPCR EvaGreen Supermix	EvaGreen	0	NA	NA	0.16546	0	21304	0	21304	0	0	0	0	NA	NA	NA	NA	NA	NA	NA	NA	21700	NA	NA	NA	NA	NA	NA	NA	NA	NA	NA	NA	NA	NA	0	13098	13098	NA	NA	NA
D5.2b	D5.2	Begula neritina	0	Manual	DQ	Unknown	Unknown	QX200 ddPCR EvaGreen Supermix	EvaGreen	0	NA	NA	0.167959	0	20987	0	20987	0	0	0	0	NA	NA	NA	NA	NA	NA	NA	NA	21700	NA	NA	NA	NA	NA	NA	NA	NA	NA	NA	NA	NA	NA	0	12716.9	12716.9	NA	NA	NA
D5.3a	D5.3	Begula neritina	0	Manual	DQ	Unknown	Unknown	QX200 ddPCR EvaGreen Supermix	EvaGreen	0	NA	NA	0.172471	0	20438	0	20438	0	0	0	0	NA	NA	NA	NA	NA	NA	NA	NA	21700	NA	NA	NA	NA	NA	NA	NA	NA	NA	NA	NA	NA	NA	0	12907.2	12907.2	NA	NA	NA
D5.3b	D5.3	Begula neritina	0.0566114	Manual	DQ	Unknown	Unknown	QX200 ddPCR EvaGreen Supermix	EvaGreen	1.13223	NA	NA	0.270401	0.00237763	20782	1	20781	0	0	0	0	NA	NA	NA	NA	NA	NA	NA	NA	21700	NA	NA	NA	NA	NA	NA	NA	NA	NA	NA	NA	NA	NA	24412.5	12887.4	12888	NA	NA	NA
N6.1a	N6.1	Begula neritina	0	Manual	DQ	Unknown	Unknown	QX200 ddPCR EvaGreen Supermix	EvaGreen	0	NA	NA	0.165111	0	21349	0	21349	0	0	0	0	NA	NA	NA	NA	NA	NA	NA	NA	21700	NA	NA	NA	NA	NA	NA	NA	NA	NA	NA	NA	NA	NA	0	12712.7	12712.7	NA	NA	NA
N6.1b	N6.1	Begula neritina	0	Manual	DQ	Unknown	Unknown	QX200 ddPCR EvaGreen Supermix	EvaGreen	0	NA	NA	0.179607	0	19626	0	19626	0	0	0	0	NA	NA	NA	NA	NA	NA	NA	NA	21700	NA	NA	NA	NA	NA	NA	NA	NA	NA	NA	NA	NA	NA	0	12706.3	12706.3	NA	NA	NA
N6.2a	N6.2	Begula neritina	0	Manual	DQ	Unknown	Unknown	QX200 ddPCR EvaGreen Supermix	EvaGreen	0	NA	NA	0.167266	0	21074	0	21074	0	0	0	0	NA	NA	NA	NA	NA	NA	NA	NA	21700	NA	NA	NA	NA	NA	NA	NA	NA	NA	NA	NA	NA	NA	0	12509.2	12509.2	NA	NA	NA
N6.2b	N6.2	Begula neritina	0.057632	Manual	DQ	Unknown	Unknown	QX200 ddPCR EvaGreen Supermix	EvaGreen	1.15264	NA	NA	0.275276	0.00242049	20414	1	20413	0	0	0	0	NA	NA	NA	NA	NA	NA	NA	NA	21700	NA	NA	NA	NA	NA	NA	NA	NA	NA	NA	NA	NA	NA	26007.3	12448.1	12448.8	NA	NA	NA
N6.3a	N6.3	Begula neritina	0.0540421	Manual	DQ	Unknown	Unknown	QX200 ddPCR EvaGreen Supermix	EvaGreen	1.08084	NA	NA	0.258128	0.00226972	21770	1	21769	0	0	0	0	NA	NA	NA	NA	NA	NA	NA	NA	21700	NA	NA	NA	NA	NA	NA	NA	NA	NA	NA	NA	NA	NA	25497.3	12251.8	12252.4	NA	NA	NA
N6.3b	N6.3	Begula neritina	0	Manual	DQ	Unknown	Unknown	QX200 ddPCR EvaGreen Supermix	EvaGreen	0	NA	NA	0.164188	0	21469	0	21469	0	0	0	0	NA	NA	NA	NA	NA	NA	NA	NA	21700	NA	NA	NA	NA	NA	NA	NA	NA	NA	NA	NA	NA	NA	0	12244.7	12244.7	NA	NA	NA
D6.1a	D6.1	Begula neritina	0	Manual	DQ	Unknown	Unknown	QX200 ddPCR EvaGreen Supermix	EvaGreen	0	NA	NA	0.175826	0	20048	0	20048	0	0	0	0	NA	NA	NA	NA	NA	NA	NA	NA	21700	NA	NA	NA	NA	NA	NA	NA	NA	NA	NA	NA	NA	NA	0	11965.2	11965.2	NA	NA	NA
D6.1b	D6.1	Begula neritina	0	Manual	DQ	Unknown	Unknown	QX200 ddPCR EvaGreen Supermix	EvaGreen	0	NA	NA	0.165126	0	21347	0	21347	0	0	0	0	NA	NA	NA	NA	NA	NA	NA	NA	21700	NA	NA	NA	NA	NA	NA	NA	NA	NA	NA	NA	NA	NA	0	12154.9	12154.9	NA	NA	NA
D6.2a	D6.2	Begula neritina	0.0557503	Manual	DQ	Unknown	Unknown	QX200 ddPCR EvaGreen Supermix	EvaGreen	1.11501	NA	NA	0.266287	0.00234146	21103	1	21102	0	0	0	0	NA	NA	NA	NA	NA	NA	NA	NA	21700	NA	NA	NA	NA	NA	NA	NA	NA	NA	NA	NA	NA	NA	24084.8	12256.8	12257.3	NA	NA	NA
D6.2b	D6.2	Begula neritina	0	Manual	DQ	Unknown	Unknown	QX200 ddPCR EvaGreen Supermix	EvaGreen	0	NA	NA	0.174012	0	20257	0	20257	0	0	0	0	NA	NA	NA	NA	NA	NA	NA	NA	21700	NA	NA	NA	NA	NA	NA	NA	NA	NA	NA	NA	NA	NA	0	12059.2	12059.2	NA	NA	NA
D6.3a	D6.3	Begula neritina	0	Manual	DQ	Unknown	Unknown	QX200 ddPCR EvaGreen Supermix	EvaGreen	0	NA	NA	0.168594	0	20908	0	20908	0	0	0	0	NA	NA	NA	NA	NA	NA	NA	NA	21700	NA	NA	NA	NA	NA	NA	NA	NA	NA	NA	NA	NA	NA	0	12037.3	12037.3	NA	NA	NA
D6.3b	D6.3	Begula neritina	0	Manual	DQ	Unknown	Unknown	QX200 ddPCR EvaGreen Supermix	EvaGreen	0	NA	NA	0.167887	0	20996	0	20996	0	0	0	0	NA	NA	NA	NA	NA	NA	NA	NA	21700	NA	NA	NA	NA	NA	NA	NA	NA	NA	NA	NA	NA	NA	0	11969.2	11969.2	NA	NA	NA
(A12 1.1) A02.1a	A12 1.1		0.216482	Manual	DQ	Unknown	Unknown	QX200 ddPCR EvaGreen Supermix	EvaGreen	4.32964	NA	NA	0.510474	0.0653192	21740	4	21736	0	0	0	0	NA	NA	NA	NA	NA	NA	NA	NA	21700	NA	NA	NA	NA	NA	NA	NA	NA	NA	NA	NA	NA	NA	23196.2	11834.9	11837	NA	NA	NA
(A12 1.1) A02.1b	A12 1.1	Begula neritina	0	Manual	DQ	Unknown	Unknown	QX200 ddPCR EvaGreen Supermix	EvaGreen	0	NA	NA	0.163162	0	21604	0	21604	0	0	0	0	NA	NA	NA	NA	NA	NA	NA	NA	21700	NA	NA	NA	NA	NA	NA	NA	NA	NA	NA	NA	NA	NA	0	11646.5	11646.5	NA	NA	NA
(A12 1.2) A02.2a	A12 1.2	Begula neritina	0.108902	Manual	DQ	Unknown	Unknown	QX200 ddPCR EvaGreen Supermix	EvaGreen	2.17804	NA	NA	0.348849	0.016498	21607	2	21605	0	0	0	0	NA	NA	NA	NA	NA	NA	NA	NA	21700	NA	NA	NA	NA	NA	NA	NA	NA	NA	NA	NA	NA	NA	23228.6	11802.7	11803.7	NA	NA	NA
(A12 1.2) A02.2b	A12 1.2	Begula neritina	0	Manual	DQ	Unknown	Unknown	QX200 ddPCR EvaGreen Supermix	EvaGreen	0	NA	NA	0.16508	0	21353	0	21353	0	0	0	0	NA	NA	NA	NA	NA	NA	NA	NA	21700	NA	NA	NA	NA	NA	NA	NA	NA	NA	NA	NA	NA	NA	0	11838.8	11838.8	NA	NA	NA
(A12 1.3) A02.3a	A12 1.3	Begula neritina	0	Manual	DQ	Unknown	Unknown	QX200 ddPCR EvaGreen Supermix	EvaGreen	0	NA	NA	0.166076	0	21225	0	21225	0	0	0	0	NA	NA	NA	NA	NA	NA	NA	NA	21700	NA	NA	NA	NA	NA	NA	NA	NA	NA	NA	NA	NA	NA	0	11661.7	11661.7	NA	NA	NA
(A12 1.3) A02.3b	A12 1.3	Begula neritina	0.0555424	Manual	DQ	Unknown	Unknown	QX200 ddPCR EvaGreen Supermix	EvaGreen	1.11085	NA	NA	0.265294	0.00233273	21182	1	21181	0	0	0	0	NA	NA	NA	NA	NA	NA	NA	NA	21700	NA	NA	NA	NA	NA	NA	NA	NA	NA	NA	NA	NA	NA	28827.3	11613.7	11614.5	NA	NA	NA
Whole sponge 6.2B	Whole sponge 6.2	Begula neritina	0	Manual	DQ	Unknown	Unknown	QX200 ddPCR EvaGreen Supermix	EvaGreen	0	NA	NA	0.16764	0	21027	0	21027	0	0	0	0	NA	NA	NA	NA	NA	NA	NA	NA	21700	NA	NA	NA	NA	NA	NA	NA	NA	NA	NA	NA	NA	NA	0	11696.2	11696.2	NA	NA	NA
Whole sponge 6.2P	Whole sponge 6.2	Begula neritina	0	Manual	DQ	Unknown	Unknown	QX200 ddPCR EvaGreen Supermix	EvaGreen	0	NA	NA	0.170461	0	20679	0	20679	0	0	0	0	NA	NA	NA	NA	NA	NA	NA	NA	21700	NA	NA	NA	NA	NA	NA	NA	NA	NA	NA	NA	NA	NA	0	11691.2	11691.2	NA	NA	NA
Blank Da	Blank Da	Begula neritina	0	Manual	DQ	Unknown	Unknown	QX200 ddPCR EvaGreen Supermix	EvaGreen	0	NA	NA	0.166397	0	21184	0	21184	0	0	0	0	NA	NA	NA	NA	NA	NA	NA	NA	21700	NA	NA	NA	NA	NA	NA	NA	NA	NA	NA	NA	NA	NA	0	11890.1	11890.1	NA	NA	NA
Blank Db	Blank Db	Begula neritina	0	Manual	DQ	Unknown	Unknown	QX200 ddPCR EvaGreen Supermix	EvaGreen	0	NA	NA	0.168224	0	20954	0	20954	0	0	0	0	NA	NA	NA	NA	NA	NA	NA	NA	21700	NA	NA	NA	NA	NA	NA	NA	NA	NA	NA	NA	NA	NA	0	11411	11411	NA	NA	NA
Blank Ma	Blank Ma	Begula neritina	0	Manual	DQ	Unknown	Unknown	QX200 ddPCR EvaGreen Supermix	EvaGreen	0	NA	NA	0.164234	0	21463	0	21463	0	0	0	0	NA	NA	NA	NA	NA	NA	NA	NA	21700	NA	NA	NA	NA	NA	NA	NA	NA	NA	NA	NA	NA	NA	0	11652.6	11652.6	NA	NA	NA
Blank Mb	Blank Mb	Begula neritina	0	Manual	DQ	Unknown	Unknown	QX200 ddPCR EvaGreen Supermix	EvaGreen	0	NA	NA	0.163883	0	21509	0	21509	0	0	0	0	NA	NA	NA	NA	NA	NA	NA	NA	21700	NA	NA	NA	NA	NA	NA	NA	NA	NA	NA	NA	NA	NA	0	11567.9	11567.9	NA	NA	NA
Blank Na	Blank Na	Begula neritina	0	Manual	DQ	Unknown	Unknown	QX200 ddPCR EvaGreen Supermix	EvaGreen	0	NA	NA	0.164956	0	21369	0	21369	0	0	0	0	NA	NA	NA	NA	NA	NA	NA	NA	21700	NA	NA	NA	NA	NA	NA	NA	NA	NA	NA	NA	NA	NA	0	11618.4	11618.4	NA	NA	NA
Blank Nb	Blank Nb	Begula neritina	0	Manual	DQ	Unknown	Unknown	QX200 ddPCR EvaGreen Supermix	EvaGreen	0	NA	NA	0.16581	0	21259	0	21259	0	0	0	0	NA	NA	NA	NA	NA	NA	NA	NA	21700	NA	NA	NA	NA	NA	NA	NA	NA	NA	NA	NA	NA	NA	0	11419.8	11419.8	NA	NA	NA
Blank 5	Blank 5	Begula neritina	0	Manual	DQ	Unknown	Unknown	QX200 ddPCR EvaGreen Supermix	EvaGreen	0	NA	NA	0.187459	0	18804	0	18804	0	0	0	0	NA	NA	NA	NA	NA	NA	NA	NA	21700	NA	NA	NA	NA	NA	NA	NA	NA	NA	NA	NA	NA	NA	0	11331.6	11331.6	NA	NA	NA
M6.1a	M6.1	Begula neritina	0.0557688	Manual	DQ	Unknown	Unknown	QX200 ddPCR EvaGreen Supermix	EvaGreen	1.11538	NA	NA	0.266376	0.00234224	21096	1	21095	0	0	0	0	NA	NA	NA	NA	NA	NA	NA	NA	21700	NA	NA	NA	NA	NA	NA	NA	NA	NA	NA	NA	NA	NA	23756.1	11511.4	11512	NA	NA	NA
M6.1b	M6.1	Begula neritina	0.0585877	Manual	DQ	Unknown	Unknown	QX200 ddPCR EvaGreen Supermix	EvaGreen	1.17175	NA	NA	0.279841	0.00246063	20081	1	20080	0	0	0	0	NA	NA	NA	NA	NA	NA	NA	NA	21700	NA	NA	NA	NA	NA	NA	NA	NA	NA	NA	NA	NA	NA	23710.4	11347.5	11348.2	NA	NA	NA
M6.2a	M6.2	Begula neritina	0	Manual	DQ	Unknown	Unknown	QX200 ddPCR EvaGreen Supermix	EvaGreen	0	NA	NA	0.171673	0	20533	0	20533	0	0	0	0	NA	NA	NA	NA	NA	NA	NA	NA	21700	NA	NA	NA	NA	NA	NA	NA	NA	NA	NA	NA	NA	NA	0	11283	11283	NA	NA	NA
M6.2b	M6.2	Begula neritina	0	Manual	DQ	Unknown	Unknown	QX200 ddPCR EvaGreen Supermix	EvaGreen	0	NA	NA	0.164471	0	21432	0	21432	0	0	0	0	NA	NA	NA	NA	NA	NA	NA	NA	21700	NA	NA	NA	NA	NA	NA	NA	NA	NA	NA	NA	NA	NA	0	11348.3	11348.3	NA	NA	NA
M6.3a	M6.3	Begula neritina	0	Manual	DQ	Unknown	Unknown	QX200 ddPCR EvaGreen Supermix	EvaGreen	0	NA	NA	0.170173	0	20714	0	20714	0	0	0	0	NA	NA	NA	NA	NA	NA	NA	NA	21700	NA	NA	NA	NA	NA	NA	NA	NA	NA	NA	NA	NA	NA	0	11228.2	11228.2	NA	NA	NA
M6.3b	M6.3	Begula neritina	0.0552087	Manual	DQ	Unknown	Unknown	QX200 ddPCR EvaGreen Supermix	EvaGreen	1.10417	NA	NA	0.2637	0.00231871	21310	1	21309	0	0	0	0	NA	NA	NA	NA	NA	NA	NA	NA	21700	NA	NA	NA	NA	NA	NA	NA	NA	NA	NA	NA	NA	NA	23576.5	11397.5	11398	NA	NA	NA
S6.1a	S6.1	Begula neritina	0	Manual	DQ	Unknown	Unknown	QX200 ddPCR EvaGreen Supermix	EvaGreen	0	NA	NA	0.166743	0	21140	0	21140	0	0	0	0	NA	NA	NA	NA	NA	NA	NA	NA	21700	NA	NA	NA	NA	NA	NA	NA	NA	NA	NA	NA	NA	NA	0	11295.6	11295.6	NA	NA	NA
S6.1b	S6.1	Begula neritina	0	Manual	DQ	Unknown	Unknown	QX200 ddPCR EvaGreen Supermix	EvaGreen	0	NA	NA	0.16832	0	20942	0	20942	0	0	0	0	NA	NA	NA	NA	NA	NA	NA	NA	21700	NA	NA	NA	NA	NA	NA	NA	NA	NA	NA	NA	NA	NA	0	11384.6	11384.6	NA	NA	NA
S6.2a	S6.2	Begula neritina	0	Manual	DQ	Unknown	Unknown	QX200 ddPCR EvaGreen Supermix	EvaGreen	0	NA	NA	0.167472	0	21048	0	21048	0	0	0	0	NA	NA	NA	NA	NA	NA	NA	NA	21700	NA	NA	NA	NA	NA	NA	NA	NA	NA	NA	NA	NA	NA	0	11377.4	11377.4	NA	NA	NA
S6.2b	S6.2	Begula neritina	0.0561012	Manual	DQ	Unknown	Unknown	QX200 ddPCR EvaGreen Supermix	EvaGreen	1.12202	NA	NA	0.267964	0.0023562	20971	1	20970	0	0	0	0	NA	NA	NA	NA	NA	NA	NA	NA	21700	NA	NA	NA	NA	NA	NA	NA	NA	NA	NA	NA	NA	NA	24670.7	11349	11349.6	NA	NA	NA
S6.3a	S6.3	Begula neritina	0.179911	Manual	DQ	Unknown	Unknown	QX200 ddPCR EvaGreen Supermix	EvaGreen	3.59823	NA	NA	0.476885	0.0426965	19619	3	19616	0	0	0	0	NA	NA	NA	NA	NA	NA	NA	NA	21700	NA	NA	NA	NA	NA	NA	NA	NA	NA	NA	NA	NA	NA	24031.1	11116.7	11118.7	NA	NA	NA
S6.3b	S6.3	Begula neritina	0	Manual	DQ	Unknown	Unknown	QX200 ddPCR EvaGreen Supermix	EvaGreen	0	NA	NA	0.177063	0	19908	0	19908	0	0	0	0	NA	NA	NA	NA	NA	NA	NA	NA	21700	NA	NA	NA	NA	NA	NA	NA	NA	NA	NA	NA	NA	NA	0	11291.2	11291.2	NA	NA	NA
(Blank A) Labelled Blank Buffer??a	(Blank A) Labelled Blank Buffer??a	Begula neritina	0	Manual	DQ	Unknown	Unknown	QX200 ddPCR EvaGreen Supermix	EvaGreen	0	NA	NA	0.164794	0	21390	0	21390	0	0	0	0	NA	NA	NA	NA	NA	NA	NA	NA	21700	NA	NA	NA	NA	NA	NA	NA	NA	NA	NA	NA	NA	NA	0	11266.8	11266.8	NA	NA	NA
(Blank A) Labelled Blank Buffer??b	(Blank A) Labelled Blank Buffer??b	Begula neritina	0	Manual	DQ	Unknown	Unknown	QX200 ddPCR EvaGreen Supermix	EvaGreen	0	NA	NA	0.173661	0	20298	0	20298	0	0	0	0	NA	NA	NA	NA	NA	NA	NA	NA	21700	NA	NA	NA	NA	NA	NA	NA	NA	NA	NA	NA	NA	NA	0	11347.7	11347.7	NA	NA	NA
Blank Whole Sponge a	Blank Whole Sponge a	Begula neritina	0	Manual	DQ	Unknown	Unknown	QX200 ddPCR EvaGreen Supermix	EvaGreen	0	NA	NA	0.167044	0	21102	0	21102	0	0	0	0	NA	NA	NA	NA	NA	NA	NA	NA	21700	NA	NA	NA	NA	NA	NA	NA	NA	NA	NA	NA	NA	NA	0	11441.7	11441.7	NA	NA	NA
Blank Whole Sponge b	Blank Whole Sponge b	Begula neritina	0	Manual	DQ	Unknown	Unknown	QX200 ddPCR EvaGreen Supermix	EvaGreen	0	NA	NA	0.177277	0	19884	0	19884	0	0	0	0	NA	NA	NA	NA	NA	NA	NA	NA	21700	NA	NA	NA	NA	NA	NA	NA	NA	NA	NA	NA	NA	NA	0	11286	11286	NA	NA	NA
Whole sponge WS1.1a	Whole sponge WS1.1	Begula neritina	0	Manual	DQ	Unknown	Unknown	QX200 ddPCR EvaGreen Supermix	EvaGreen	0	NA	NA	0.192244	0	18336	0	18336	0	0	0	0	NA	NA	NA	NA	NA	NA	NA	NA	21700	NA	NA	NA	NA	NA	NA	NA	NA	NA	NA	NA	NA	NA	0	11085.7	11085.7	NA	NA	NA
Whole sponge WS 1.1b	Whole sponge WS1.1	Begula neritina	0	Manual	DQ	Unknown	Unknown	QX200 ddPCR EvaGreen Supermix	EvaGreen	0	NA	NA	0.174685	0	20179	0	20179	0	0	0	0	NA	NA	NA	NA	NA	NA	NA	NA	21700	NA	NA	NA	NA	NA	NA	NA	NA	NA	NA	NA	NA	NA	0	11289.4	11289.4	NA	NA	NA
Whole sponge WS1.2a	Whole sponge WS1.2	Begula neritina	0	Manual	DQ	Unknown	Unknown	QX200 ddPCR EvaGreen Supermix	EvaGreen	0	NA	NA	0.165872	0	21251	0	21251	0	0	0	0	NA	NA	NA	NA	NA	NA	NA	NA	21700	NA	NA	NA	NA	NA	NA	NA	NA	NA	NA	NA	NA	NA	0	10475.6	10475.6	NA	NA	NA
Whole sponge WS1.2b	Whole sponge WS1.2	Begula neritina	0	Manual	DQ	Unknown	Unknown	QX200 ddPCR EvaGreen Supermix	EvaGreen	0	NA	NA	0.163154	0	21605	0	21605	0	0	0	0	NA	NA	NA	NA	NA	NA	NA	NA	21700	NA	NA	NA	NA	NA	NA	NA	NA	NA	NA	NA	NA	NA	0	11207.8	11207.8	NA	NA	NA
Whole sponge WS1.3a	Whole sponge WS1.3	Begula neritina	0.0605258	Manual	DQ	Unknown	Unknown	QX200 ddPCR EvaGreen Supermix	EvaGreen	1.21052	NA	NA	0.289099	0.00254202	19438	1	19437	0	0	0	0	NA	NA	NA	NA	NA	NA	NA	NA	21700	NA	NA	NA	NA	NA	NA	NA	NA	NA	NA	NA	NA	NA	26127.7	10907.1	10907.9	NA	NA	NA
Whole sponge WS1.3b	Whole sponge WS1.3	Begula neritina	0	Manual	DQ	Unknown	Unknown	QX200 ddPCR EvaGreen Supermix	EvaGreen	0	NA	NA	0.164702	0	21402	0	21402	0	0	0	0	NA	NA	NA	NA	NA	NA	NA	NA	21700	NA	NA	NA	NA	NA	NA	NA	NA	NA	NA	NA	NA	NA	0	11243.8	11243.8	NA	NA	NA
Whole sponge WS2.1	Whole sponge WS2.1	Begula neritina	0	Manual	DQ	Unknown	Unknown	QX200 ddPCR EvaGreen Supermix	EvaGreen	0	NA	NA	0.177545	0	19854	0	19854	0	0	0	0	NA	NA	NA	NA	NA	NA	NA	NA	21700	NA	NA	NA	NA	NA	NA	NA	NA	NA	NA	NA	NA	NA	0	11213.6	11213.6	NA	NA	NA
Whole sponge WS2.2	Whole sponge WS2.2	Begula neritina	0	Manual	DQ	Unknown	Unknown	QX200 ddPCR EvaGreen Supermix	EvaGreen	0	NA	NA	0.184728	0	19082	0	19082	0	0	0	0	NA	NA	NA	NA	NA	NA	NA	NA	21700	NA	NA	NA	NA	NA	NA	NA	NA	NA	NA	NA	NA	NA	0	11017.1	11017.1	NA	NA	NA
Whole sponge WS2.3	Whole sponge WS2.3	Begula neritina	0	Manual	DQ	Unknown	Unknown	QX200 ddPCR EvaGreen Supermix	EvaGreen	0	NA	NA	0.171406	0	20565	0	20565	0	0	0	0	NA	NA	NA	NA	NA	NA	NA	NA	21700	NA	NA	NA	NA	NA	NA	NA	NA	NA	NA	NA	NA	NA	0	11201.2	11201.2	NA	NA	NA
Whole sponge WS3.1	Whole sponge WS3.1	Begula neritina	0	Manual	DQ	Unknown	Unknown	QX200 ddPCR EvaGreen Supermix	EvaGreen	0	NA	NA	0.1798	0	19605	0	19605	0	0	0	0	NA	NA	NA	NA	NA	NA	NA	NA	21700	NA	NA	NA	NA	NA	NA	NA	NA	NA	NA	NA	NA	NA	0	11257.2	11257.2	NA	NA	NA
Whole sponge WS3.2	Whole sponge WS3.2	Begula neritina	0	Manual	DQ	Unknown	Unknown	QX200 ddPCR EvaGreen Supermix	EvaGreen	0	NA	NA	0.168159	0	20962	0	20962	0	0	0	0	NA	NA	NA	NA	NA	NA	NA	NA	21700	NA	NA	NA	NA	NA	NA	NA	NA	NA	NA	NA	NA	NA	0	10961.4	10961.4	NA	NA	NA
Whole sponge WS3.3	Whole sponge WS3.3	Begula neritina	0	Manual	DQ	Unknown	Unknown	QX200 ddPCR EvaGreen Supermix	EvaGreen	0	NA	NA	0.161828	0	21782	0	21782	0	0	0	0	NA	NA	NA	NA	NA	NA	NA	NA	21700	NA	NA	NA	NA	NA	NA	NA	NA	NA	NA	NA	NA	NA	0	11053.2	11053.2	NA	NA	NA
Whole sponge WS4.1	Whole sponge WS4.1	Begula neritina	0	Manual	DQ	Unknown	Unknown	QX200 ddPCR EvaGreen Supermix	EvaGreen	0	NA	NA	0.167052	0	21101	0	21101	0	0	0	0	NA	NA	NA	NA	NA	NA	NA	NA	21700	NA	NA	NA	NA	NA	NA	NA	NA	NA	NA	NA	NA	NA	0	10995.3	10995.3	NA	NA	NA
Whole sponge WS4.2	Whole sponge WS4.2	Begula neritina	0.0576489	Manual	DQ	Unknown	Unknown	QX200 ddPCR EvaGreen Supermix	EvaGreen	1.15298	NA	NA	0.275357	0.0024212	20408	1	20407	0	0	0	0	NA	NA	NA	NA	NA	NA	NA	NA	21700	NA	NA	NA	NA	NA	NA	NA	NA	NA	NA	NA	NA	NA	23306.3	10800.3	10800.9	NA	NA	NA
Whole sponge WS4.3	Whole sponge WS4.3	Begula neritina	0	Manual	DQ	Unknown	Unknown	QX200 ddPCR EvaGreen Supermix	EvaGreen	0	NA	NA	0.17184	0	20513	0	20513	0	0	0	0	NA	NA	NA	NA	NA	NA	NA	NA	21700	NA	NA	NA	NA	NA	NA	NA	NA	NA	NA	NA	NA	NA	0	10740.4	10740.4	NA	NA	NA
Whole sponge WS5.1	Whole sponge WS5.1	Begula neritina	0	Manual	DQ	Unknown	Unknown	QX200 ddPCR EvaGreen Supermix	EvaGreen	0	NA	NA	0.179617	0	19625	0	19625	0	0	0	0	NA	NA	NA	NA	NA	NA	NA	NA	21700	NA	NA	NA	NA	NA	NA	NA	NA	NA	NA	NA	NA	NA	0	11191	11191	NA	NA	NA
Whole sponge WS5.2	Whole sponge WS5.2	Begula neritina	0	Manual	DQ	Unknown	Unknown	QX200 ddPCR EvaGreen Supermix	EvaGreen	0	NA	NA	0.180463	0	19533	0	19533	0	0	0	0	NA	NA	NA	NA	NA	NA	NA	NA	21700	NA	NA	NA	NA	NA	NA	NA	NA	NA	NA	NA	NA	NA	0	11023.6	11023.6	NA	NA	NA
Whole sponge WS5.3	Whole sponge WS5.3	Begula neritina	0	Manual	DQ	Unknown	Unknown	QX200 ddPCR EvaGreen Supermix	EvaGreen	0	NA	NA	0.167959	0	20987	0	20987	0	0	0	0	NA	NA	NA	NA	NA	NA	NA	NA	21700	NA	NA	NA	NA	NA	NA	NA	NA	NA	NA	NA	NA	NA	0	11089.6	11089.6	NA	NA	NA
Whole sponge WS6.1	Whole sponge WS6.1	Begula neritina	0	Manual	DQ	Unknown	Unknown	QX200 ddPCR EvaGreen Supermix	EvaGreen	0	NA	NA	0.166452	0	21177	0	21177	0	0	0	0	NA	NA	NA	NA	NA	NA	NA	NA	21700	NA	NA	NA	NA	NA	NA	NA	NA	NA	NA	NA	NA	NA	0	11146.6	11146.6	NA	NA	NA
Whole sponge WS6.3	Whole sponge WS6.3	Begula neritina	0	Manual	DQ	Unknown	Unknown	QX200 ddPCR EvaGreen Supermix	EvaGreen	0	NA	NA	0.184149	0	19142	0	19142	0	0	0	0	NA	NA	NA	NA	NA	NA	NA	NA	21700	NA	NA	NA	NA	NA	NA	NA	NA	NA	NA	NA	NA	NA	0	11329	11329	NA	NA	NA
Blank 6	Blank 6	Begula neritina	0	Manual	DQ	Unknown	Unknown	QX200 ddPCR EvaGreen Supermix	EvaGreen	0	NA	NA	0.19367	0	18201	0	18201	0	0	0	0	NA	NA	NA	NA	NA	NA	NA	NA	21700	NA	NA	NA	NA	NA	NA	NA	NA	NA	NA	NA	NA	NA	0	11185.1	11185.1	NA	NA	NA
Negative	Negative	Begula neritina	0	Manual	DQ	Unknown	Unknown	QX200 ddPCR EvaGreen Supermix	EvaGreen	0	NA	NA	0.169927	0	20744	0	20744	0	0	0	0	NA	NA	NA	NA	NA	NA	NA	NA	21700	NA	NA	NA	NA	NA	NA	NA	NA	NA	NA	NA	NA	NA	0	11499.6	11499.6	NA	NA	NA
Negative	Negative	Begula neritina	0	Manual	DQ	Unknown	Unknown	QX200 ddPCR EvaGreen Supermix	EvaGreen	0	NA	NA	0.185399	0	19013	0	19013	0	0	0	0	NA	NA	NA	NA	NA	NA	NA	NA	21700	NA	NA	NA	NA	NA	NA	NA	NA	NA	NA	NA	NA	NA	0	11422	11422	NA	NA	NA
Negative	Negative	Begula neritina	0	Manual	DQ	Unknown	Unknown	QX200 ddPCR EvaGreen Supermix	EvaGreen	0	NA	NA	0.168368	0	20936	0	20936	0	0	0	0	NA	NA	NA	NA	NA	NA	NA	NA	21700	NA	NA	NA	NA	NA	NA	NA	NA	NA	NA	NA	NA	NA	0	11774.6	11774.6	NA	NA	NA
Negative	Negative	Begula neritina	0	Manual	DQ	Unknown	Unknown	QX200 ddPCR EvaGreen Supermix	EvaGreen	0	NA	NA	0.19055	0	18499	0	18499	0	0	0	0	NA	NA	NA	NA	NA	NA	NA	NA	21700	NA	NA	NA	NA	NA	NA	NA	NA	NA	NA	NA	NA	NA	0	11462.3	11462.3	NA	NA	NA
Positive 1:100	Positive 1:100	Begula neritina	17.0988	Manual	DQ	Unknown	Unknown	QX200 ddPCR EvaGreen Supermix	EvaGreen	341.975	NA	NA	19.0321	15.1686	20861	301	20560	0	0	0	0	NA	NA	NA	NA	NA	NA	NA	NA	21700	NA	NA	NA	NA	NA	NA	NA	NA	NA	NA	NA	NA	NA	24986.8	11733.6	11924.8	NA	NA	NA
[truncated: 15 more columns]

## Sheet: Undaria
sample	id	target	conc_copies_u_l	status	experiment	sample_type	target_type	supermix	dye_name_s	copies_20m_l_well	total_conf_max	total_conf_min	poisson_conf_max	poisson_conf_min	accepted_droplets	positives	negatives	ch1_ch2	ch1_ch2_2	ch1_ch2_3	ch1_ch2_4	linkage	cnv	total_cnv_max	total_cnv_min	poisson_cnv_max	poisson_cnv_min	reference_copies	unknown_copies	threshold1	threshold2	threshold3	reference_used	ratio	total_ratio_max	total_ratio_min	poisson_ratio_max	poisson_ratio_min	fractional_abundance	total_fractional_abundance_max	total_fractional_abundance_min	poisson_fractional_abundance_max	poisson_fractional_abundance_min	mean_amplitude_of_positives	mean_amplitude_of_negatives	mean_amplitude_total	experiment_comments	merged_wells	total_confidence_max68
S1.3	S1.3	Undaria	NA	CHECK	DQ	Unknown	Unknown	ddPCR Supermix for Probes (no dUTP)	FAM	NA	NA	NA	NA	NA	0	0	0	0	0	0	0	NA	NA	NA	NA	NA	NA	NA	NA	NA	NA	NA	NA	NA	NA	NA	NA	NA	NA	NA	NA	NA	NA	0	0	0	NA	NA	NA
M1.1	M1.1	Undaria	0	Manual	DQ	Unknown	Unknown	ddPCR Supermix for Probes (no dUTP)	FAM	0	NA	NA	0.184612	0	19094	0	19094	0	0	0	0	NA	NA	NA	NA	NA	NA	NA	NA	1500	NA	NA	NA	NA	NA	NA	NA	NA	NA	NA	NA	NA	NA	0	566.312	566.312	NA	NA	NA
M1.2	M1.2	Undaria	0	Manual	DQ	Unknown	Unknown	ddPCR Supermix for Probes (no dUTP)	FAM	0	NA	NA	0.17491	0	20153	0	20153	0	0	0	0	NA	NA	NA	NA	NA	NA	NA	NA	1500	NA	NA	NA	NA	NA	NA	NA	NA	NA	NA	NA	NA	NA	0	555.971	555.971	NA	NA	NA
M1.3	M1.3	Undaria	0.0619081	Manual	DQ	Unknown	Unknown	ddPCR Supermix for Probes (no dUTP)	FAM	1.23816	NA	NA	0.295702	0.00260007	19004	1	19003	0	0	0	0	NA	NA	NA	NA	NA	NA	NA	NA	1500	NA	NA	NA	NA	NA	NA	NA	NA	NA	NA	NA	NA	NA	1655.34	584.917	584.973	NA	NA	NA
N1.1	N1.1	Undaria	0	Manual	DQ	Unknown	Unknown	ddPCR Supermix for Probes (no dUTP)	FAM	0	NA	NA	0.176673	0	19952	0	19952	0	0	0	0	NA	NA	NA	NA	NA	NA	NA	NA	1500	NA	NA	NA	NA	NA	NA	NA	NA	NA	NA	NA	NA	NA	0	539.518	539.518	NA	NA	NA
N1.2	N1.2	Undaria	0.0653831	Manual	DQ	Unknown	Unknown	ddPCR Supermix for Probes (no dUTP)	FAM	1.30766	NA	NA	0.312302	0.00274602	17994	1	17993	0	0	0	0	NA	NA	NA	NA	NA	NA	NA	NA	1500	NA	NA	NA	NA	NA	NA	NA	NA	NA	NA	NA	NA	NA	1509.29	581.915	581.967	NA	NA	NA
N1.3	N1.3	Undaria	0	Manual	DQ	Unknown	Unknown	ddPCR Supermix for Probes (no dUTP)	FAM	0	NA	NA	0.182282	0	19338	0	19338	0	0	0	0	NA	NA	NA	NA	NA	NA	NA	NA	1500	NA	NA	NA	NA	NA	NA	NA	NA	NA	NA	NA	NA	NA	0	554.146	554.146	NA	NA	NA
D1.1	D1.1	Undaria	0	Manual	DQ	Unknown	Unknown	ddPCR Supermix for Probes (no dUTP)	FAM	0	NA	NA	0.17297	0	20379	0	20379	0	0	0	0	NA	NA	NA	NA	NA	NA	NA	NA	1500	NA	NA	NA	NA	NA	NA	NA	NA	NA	NA	NA	NA	NA	0	563.773	563.773	NA	NA	NA
D1.2	D1.2	Undaria	0	Manual	DQ	Unknown	Unknown	ddPCR Supermix for Probes (no dUTP)	FAM	0	NA	NA	0.177393	0	19871	0	19871	0	0	0	0	NA	NA	NA	NA	NA	NA	NA	NA	1500	NA	NA	NA	NA	NA	NA	NA	NA	NA	NA	NA	NA	NA	0	549.395	549.395	NA	NA	NA
Blank 1	Blank 1	Undaria	0	Manual	DQ	Unknown	Unknown	ddPCR Supermix for Probes (no dUTP)	FAM	0	NA	NA	0.181391	0	19433	0	19433	0	0	0	0	NA	NA	NA	NA	NA	NA	NA	NA	1500	NA	NA	NA	NA	NA	NA	NA	NA	NA	NA	NA	NA	NA	0	569.67	569.67	NA	NA	NA
D1.3 a	D1.3	Undaria	0.0600317	Manual	DQ	Unknown	Unknown	ddPCR Supermix for Probes (no dUTP)	FAM	1.20063	NA	NA	0.286739	0.00252127	19598	1	19597	0	0	0	0	NA	NA	NA	NA	NA	NA	NA	NA	1500	NA	NA	NA	NA	NA	NA	NA	NA	NA	NA	NA	NA	NA	1514.49	547.069	547.118	NA	NA	NA
D1.3 b	D1.3	Undaria	0	Manual	DQ	Unknown	Unknown	ddPCR Supermix for Probes (no dUTP)	FAM	0	NA	NA	0.184274	0	19129	0	19129	0	0	0	0	NA	NA	NA	NA	NA	NA	NA	NA	1500	NA	NA	NA	NA	NA	NA	NA	NA	NA	NA	NA	NA	NA	0	581.955	581.955	NA	NA	NA
S2.1 a	S2.1	Undaria	0	Manual	DQ	Unknown	Unknown	ddPCR Supermix for Probes (no dUTP)	FAM	0	NA	NA	0.177455	0	19864	0	19864	0	0	0	0	NA	NA	NA	NA	NA	NA	NA	NA	1500	NA	NA	NA	NA	NA	NA	NA	NA	NA	NA	NA	NA	NA	0	559.774	559.774	NA	NA	NA
S2.1 b	S2.1	Undaria	0	Manual	DQ	Unknown	Unknown	ddPCR Supermix for Probes (no dUTP)	FAM	0	NA	NA	0.167385	0	21059	0	21059	0	0	0	0	NA	NA	NA	NA	NA	NA	NA	NA	1500	NA	NA	NA	NA	NA	NA	NA	NA	NA	NA	NA	NA	NA	0	583.402	583.402	NA	NA	NA
S2.2 a	S2.2	Undaria	0	Manual	DQ	Unknown	Unknown	ddPCR Supermix for Probes (no dUTP)	FAM	0	NA	NA	0.180213	0	19560	0	19560	0	0	0	0	NA	NA	NA	NA	NA	NA	NA	NA	1500	NA	NA	NA	NA	NA	NA	NA	NA	NA	NA	NA	NA	NA	0	572.821	572.821	NA	NA	NA
S2.2 b	S2.2	Undaria	0	Manual	DQ	Unknown	Unknown	ddPCR Supermix for Probes (no dUTP)	FAM	0	NA	NA	0.170932	0	20622	0	20622	0	0	0	0	NA	NA	NA	NA	NA	NA	NA	NA	1500	NA	NA	NA	NA	NA	NA	NA	NA	NA	NA	NA	NA	NA	0	572.041	572.041	NA	NA	NA
S2.3 a	S2.3	Undaria	0	Manual	DQ	Unknown	Unknown	ddPCR Supermix for Probes (no dUTP)	FAM	0	NA	NA	0.168473	0	20923	0	20923	0	0	0	0	NA	NA	NA	NA	NA	NA	NA	NA	1500	NA	NA	NA	NA	NA	NA	NA	NA	NA	NA	NA	NA	NA	0	571.877	571.877	NA	NA	NA
S2.3 b	S2.3	Undaria	0	Manual	DQ	Unknown	Unknown	ddPCR Supermix for Probes (no dUTP)	FAM	0	NA	NA	0.187191	0	18831	0	18831	0	0	0	0	NA	NA	NA	NA	NA	NA	NA	NA	1500	NA	NA	NA	NA	NA	NA	NA	NA	NA	NA	NA	NA	NA	0	582.845	582.845	NA	NA	NA
M2.1 a	M2.1	Undaria	0	Manual	DQ	Unknown	Unknown	ddPCR Supermix for Probes (no dUTP)	FAM	0	NA	NA	0.180574	0	19521	0	19521	0	0	0	0	NA	NA	NA	NA	NA	NA	NA	NA	1500	NA	NA	NA	NA	NA	NA	NA	NA	NA	NA	NA	NA	NA	0	563.506	563.506	NA	NA	NA
M2.1 b	M2.1	Undaria	0	Manual	DQ	Unknown	Unknown	ddPCR Supermix for Probes (no dUTP)	FAM	0	NA	NA	0.193098	0	18255	0	18255	0	0	0	0	NA	NA	NA	NA	NA	NA	NA	NA	1500	NA	NA	NA	NA	NA	NA	NA	NA	NA	NA	NA	NA	NA	0	579.295	579.295	NA	NA	NA
M2.2 a	M2.2	Undaria	0.0559412	Manual	DQ	Unknown	Unknown	ddPCR Supermix for Probes (no dUTP)	FAM	1.11882	NA	NA	0.267199	0.00234948	21031	1	21030	0	0	0	0	NA	NA	NA	NA	NA	NA	NA	NA	1500	NA	NA	NA	NA	NA	NA	NA	NA	NA	NA	NA	NA	NA	3661.19	556.868	557.015	NA	NA	NA
M2.2 b	M2.2	Undaria	0.0585149	Manual	DQ	Unknown	Unknown	ddPCR Supermix for Probes (no dUTP)	FAM	1.1703	NA	NA	0.279493	0.00245757	20106	1	20105	0	0	0	0	NA	NA	NA	NA	NA	NA	NA	NA	1500	NA	NA	NA	NA	NA	NA	NA	NA	NA	NA	NA	NA	NA	5801.16	596.012	596.271	NA	NA	NA
M2.3 a	M2.3	Undaria	0	Manual	DQ	Unknown	Unknown	ddPCR Supermix for Probes (no dUTP)	FAM	0	NA	NA	0.176805	0	19937	0	19937	0	0	0	0	NA	NA	NA	NA	NA	NA	NA	NA	1500	NA	NA	NA	NA	NA	NA	NA	NA	NA	NA	NA	NA	NA	0	580.302	580.302	NA	NA	NA
M2.3 b	M2.3	Undaria	0	Manual	DQ	Unknown	Unknown	ddPCR Supermix for Probes (no dUTP)	FAM	0	NA	NA	0.185868	0	18965	0	18965	0	0	0	0	NA	NA	NA	NA	NA	NA	NA	NA	1500	NA	NA	NA	NA	NA	NA	NA	NA	NA	NA	NA	NA	NA	0	587.415	587.415	NA	NA	NA
N2.1 a	N2.1	Undaria	0	Manual	DQ	Unknown	Unknown	ddPCR Supermix for Probes (no dUTP)	FAM	0	NA	NA	0.18468	0	19087	0	19087	0	0	0	0	NA	NA	NA	NA	NA	NA	NA	NA	1500	NA	NA	NA	NA	NA	NA	NA	NA	NA	NA	NA	NA	NA	0	560.463	560.463	NA	NA	NA
N2.1 b	N2.1	Undaria	0	Manual	DQ	Unknown	Unknown	ddPCR Supermix for Probes (no dUTP)	FAM	0	NA	NA	0.190912	0	18464	0	18464	0	0	0	0	NA	NA	NA	NA	NA	NA	NA	NA	1500	NA	NA	NA	NA	NA	NA	NA	NA	NA	NA	NA	NA	NA	0	564.196	564.196	NA	NA	NA
N2.2 a	N2.2	Undaria	0	Manual	DQ	Unknown	Unknown	ddPCR Supermix for Probes (no dUTP)	FAM	0	NA	NA	0.174064	0	20251	0	20251	0	0	0	0	NA	NA	NA	NA	NA	NA	NA	NA	1500	NA	NA	NA	NA	NA	NA	NA	NA	NA	NA	NA	NA	NA	0	573.526	573.526	NA	NA	NA
N2.2 b	N2.2	Undaria	0	Manual	DQ	Unknown	Unknown	ddPCR Supermix for Probes (no dUTP)	FAM	0	NA	NA	0.178038	0	19799	0	19799	0	0	0	0	NA	NA	NA	NA	NA	NA	NA	NA	1500	NA	NA	NA	NA	NA	NA	NA	NA	NA	NA	NA	NA	NA	0	579.574	579.574	NA	NA	NA
N2.3B	N2.3	Undaria	0.0581389	Manual	DQ	Unknown	Unknown	ddPCR Supermix for Probes (no dUTP)	FAM	1.16278	NA	NA	0.277698	0.00244178	20236	1	20235	0	0	0	0	NA	NA	NA	NA	NA	NA	NA	NA	1500	NA	NA	NA	NA	NA	NA	NA	NA	NA	NA	NA	NA	NA	2003.22	558.102	558.174	NA	NA	NA
N2.3P	N2.3	Undaria	0.0556185	Manual	DQ	Unknown	Unknown	ddPCR Supermix for Probes (no dUTP)	FAM	1.11237	NA	NA	0.265658	0.00233592	21153	1	21152	0	0	0	0	NA	NA	NA	NA	NA	NA	NA	NA	1500	NA	NA	NA	NA	NA	NA	NA	NA	NA	NA	NA	NA	NA	9498.69	577.521	577.943	NA	NA	NA
D2.1 a	D2.1	Undaria	0.0547947	Manual	DQ	Unknown	Unknown	ddPCR Supermix for Probes (no dUTP)	FAM	1.09589	NA	NA	0.261723	0.00230133	21471	1	21470	0	0	0	0	NA	NA	NA	NA	NA	NA	NA	NA	1500	NA	NA	NA	NA	NA	NA	NA	NA	NA	NA	NA	NA	NA	1558.08	573.609	573.655	NA	NA	NA
D2.1 b	D2.1	Undaria	0	Manual	DQ	Unknown	Unknown	ddPCR Supermix for Probes (no dUTP)	FAM	0	NA	NA	0.171281	0	20580	0	20580	0	0	0	0	NA	NA	NA	NA	NA	NA	NA	NA	1500	NA	NA	NA	NA	NA	NA	NA	NA	NA	NA	NA	NA	NA	0	588.688	588.688	NA	NA	NA
D2.2 a	D2.2	Undaria	0	Manual	DQ	Unknown	Unknown	ddPCR Supermix for Probes (no dUTP)	FAM	0	NA	NA	0.174012	0	20257	0	20257	0	0	0	0	NA	NA	NA	NA	NA	NA	NA	NA	1500	NA	NA	NA	NA	NA	NA	NA	NA	NA	NA	NA	NA	NA	0	576.492	576.492	NA	NA	NA
D2.2 b	D2.2	Undaria	0	Manual	DQ	Unknown	Unknown	ddPCR Supermix for Probes (no dUTP)	FAM	0	NA	NA	0.172615	0	20421	0	20421	0	0	0	0	NA	NA	NA	NA	NA	NA	NA	NA	1500	NA	NA	NA	NA	NA	NA	NA	NA	NA	NA	NA	NA	NA	0	581.453	581.453	NA	NA	NA
D2.3 a	D2.3	Undaria	0	Manual	DQ	Unknown	Unknown	ddPCR Supermix for Probes (no dUTP)	FAM	0	NA	NA	0.179206	0	19670	0	19670	0	0	0	0	NA	NA	NA	NA	NA	NA	NA	NA	1500	NA	NA	NA	NA	NA	NA	NA	NA	NA	NA	NA	NA	NA	0	593.201	593.201	NA	NA	NA
D2.3 b	D2.3	Undaria	0	Manual	DQ	Unknown	Unknown	ddPCR Supermix for Probes (no dUTP)	FAM	0	NA	NA	0.166838	0	21128	0	21128	0	0	0	0	NA	NA	NA	NA	NA	NA	NA	NA	1500	NA	NA	NA	NA	NA	NA	NA	NA	NA	NA	NA	NA	NA	0	587.224	587.224	NA	NA	NA
S3.1a	S3.1	Undaria	0.055336	Manual	DQ	Unknown	Unknown	ddPCR Supermix for Probes (no dUTP)	FAM	1.10672	NA	NA	0.264308	0.00232406	21261	1	21260	0	0	0	0	NA	NA	NA	NA	NA	NA	NA	NA	1500	NA	NA	NA	NA	NA	NA	NA	NA	NA	NA	NA	NA	NA	1769.64	596.045	596.1	NA	NA	NA
S3.1b	S3.1	Undaria	0	Manual	DQ	Unknown	Unknown	ddPCR Supermix for Probes (no dUTP)	FAM	0	NA	NA	0.180306	0	19550	0	19550	0	0	0	0	NA	NA	NA	NA	NA	NA	NA	NA	1500	NA	NA	NA	NA	NA	NA	NA	NA	NA	NA	NA	NA	NA	0	601.216	601.216	NA	NA	NA
S3.2a	S3.2	Undaria	0.0580729	Manual	DQ	Unknown	Unknown	ddPCR Supermix for Probes (no dUTP)	FAM	1.16146	NA	NA	0.277382	0.00243901	20259	1	20258	0	0	0	0	NA	NA	NA	NA	NA	NA	NA	NA	1500	NA	NA	NA	NA	NA	NA	NA	NA	NA	NA	NA	NA	NA	1710.72	598.271	598.326	NA	NA	NA
S3.2b	S3.2	Undaria	0	Manual	DQ	Unknown	Unknown	ddPCR Supermix for Probes (no dUTP)	FAM	0	NA	NA	0.175337	0	20104	0	20104	0	0	0	0	NA	NA	NA	NA	NA	NA	NA	NA	1500	NA	NA	NA	NA	NA	NA	NA	NA	NA	NA	NA	NA	NA	0	608.23	608.23	NA	NA	NA
S3.3a	S3.3	Undaria	0	Manual	DQ	Unknown	Unknown	ddPCR Supermix for Probes (no dUTP)	FAM	0	NA	NA	0.171381	0	20568	0	20568	0	0	0	0	NA	NA	NA	NA	NA	NA	NA	NA	1500	NA	NA	NA	NA	NA	NA	NA	NA	NA	NA	NA	NA	NA	0	602.753	602.753	NA	NA	NA
S3.3b	S3.3	Undaria	0.0595425	Manual	DQ	Unknown	Unknown	ddPCR Supermix for Probes (no dUTP)	FAM	1.19085	NA	NA	0.284402	0.00250073	19759	1	19758	0	0	0	0	NA	NA	NA	NA	NA	NA	NA	NA	1500	NA	NA	NA	NA	NA	NA	NA	NA	NA	NA	NA	NA	NA	7915.02	611.313	611.683	NA	NA	NA
M3.1a	M3.1	Undaria	0	Manual	DQ	Unknown	Unknown	ddPCR Supermix for Probes (no dUTP)	FAM	0	NA	NA	0.18534	0	19019	0	19019	0	0	0	0	NA	NA	NA	NA	NA	NA	NA	NA	1500	NA	NA	NA	NA	NA	NA	NA	NA	NA	NA	NA	NA	NA	0	605.859	605.859	NA	NA	NA
M3.1b	M3.1	Undaria	0	Manual	DQ	Unknown	Unknown	ddPCR Supermix for Probes (no dUTP)	FAM	0	NA	NA	0.177045	0	19910	0	19910	0	0	0	0	NA	NA	NA	NA	NA	NA	NA	NA	1500	NA	NA	NA	NA	NA	NA	NA	NA	NA	NA	NA	NA	NA	0	612.449	612.449	NA	NA	NA
M3.2a	M3.2	Undaria	0	Manual	DQ	Unknown	Unknown	ddPCR Supermix for Probes (no dUTP)	FAM	0	NA	NA	0.17802	0	19801	0	19801	0	0	0	0	NA	NA	NA	NA	NA	NA	NA	NA	1500	NA	NA	NA	NA	NA	NA	NA	NA	NA	NA	NA	NA	NA	0	590.658	590.658	NA	NA	NA
M3.2b	M3.2	Undaria	0	Manual	DQ	Unknown	Unknown	ddPCR Supermix for Probes (no dUTP)	FAM	0	NA	NA	0.16903	0	20854	0	20854	0	0	0	0	NA	NA	NA	NA	NA	NA	NA	NA	1500	NA	NA	NA	NA	NA	NA	NA	NA	NA	NA	NA	NA	NA	0	604.974	604.974	NA	NA	NA
M3.3a	M3.3	Undaria	0	Manual	DQ	Unknown	Unknown	ddPCR Supermix for Probes (no dUTP)	FAM	0	NA	NA	0.169632	0	20780	0	20780	0	0	0	0	NA	NA	NA	NA	NA	NA	NA	NA	1500	NA	NA	NA	NA	NA	NA	NA	NA	NA	NA	NA	NA	NA	0	605.285	605.285	NA	NA	NA
M3.3b	M3.3	Undaria	0	Manual	DQ	Unknown	Unknown	ddPCR Supermix for Probes (no dUTP)	FAM	0	NA	NA	0.180861	0	19490	0	19490	0	0	0	0	NA	NA	NA	NA	NA	NA	NA	NA	1500	NA	NA	NA	NA	NA	NA	NA	NA	NA	NA	NA	NA	NA	0	613.376	613.376	NA	NA	NA
Blank 2	Blank 2	Undaria	0	Manual	DQ	Unknown	Unknown	ddPCR Supermix for Probes (no dUTP)	FAM	0	NA	NA	0.17446	0	20205	0	20205	0	0	0	0	NA	NA	NA	NA	NA	NA	NA	NA	1500	NA	NA	NA	NA	NA	NA	NA	NA	NA	NA	NA	NA	NA	0	600.162	600.162	NA	NA	NA
N3.1a	N3.1	Undaria	0	Manual	DQ	Unknown	Unknown	ddPCR Supermix for Probes (no dUTP)	FAM	0	NA	NA	0.179096	0	19682	0	19682	0	0	0	0	NA	NA	NA	NA	NA	NA	NA	NA	1500	NA	NA	NA	NA	NA	NA	NA	NA	NA	NA	NA	NA	NA	0	602.668	602.668	NA	NA	NA
N3.1b	N3.1	Undaria	0	Manual	DQ	Unknown	Unknown	ddPCR Supermix for Probes (no dUTP)	FAM	0	NA	NA	0.181186	0	19455	0	19455	0	0	0	0	NA	NA	NA	NA	NA	NA	NA	NA	1500	NA	NA	NA	NA	NA	NA	NA	NA	NA	NA	NA	NA	NA	0	602.952	602.952	NA	NA	NA
N3.2a	N3.2	Undaria	0	Manual	DQ	Unknown	Unknown	ddPCR Supermix for Probes (no dUTP)	FAM	0	NA	NA	0.178344	0	19765	0	19765	0	0	0	0	NA	NA	NA	NA	NA	NA	NA	NA	1500	NA	NA	NA	NA	NA	NA	NA	NA	NA	NA	NA	NA	NA	0	606.184	606.184	NA	NA	NA
N3.2b	N3.2	Undaria	0	Manual	DQ	Unknown	Unknown	ddPCR Supermix for Probes (no dUTP)	FAM	0	NA	NA	0.178878	0	19706	0	19706	0	0	0	0	NA	NA	NA	NA	NA	NA	NA	NA	1500	NA	NA	NA	NA	NA	NA	NA	NA	NA	NA	NA	NA	NA	0	605.041	605.041	NA	NA	NA
N3.3a	N3.3	Undaria	0	Manual	DQ	Unknown	Unknown	ddPCR Supermix for Probes (no dUTP)	FAM	0	NA	NA	0.171824	0	20515	0	20515	0	0	0	0	NA	NA	NA	NA	NA	NA	NA	NA	1500	NA	NA	NA	NA	NA	NA	NA	NA	NA	NA	NA	NA	NA	0	618.03	618.03	NA	NA	NA
N3.3b	N3.3	Undaria	0	Manual	DQ	Unknown	Unknown	ddPCR Supermix for Probes (no dUTP)	FAM	0	NA	NA	0.185858	0	18966	0	18966	0	0	0	0	NA	NA	NA	NA	NA	NA	NA	NA	1500	NA	NA	NA	NA	NA	NA	NA	NA	NA	NA	NA	NA	NA	0	614.53	614.53	NA	NA	NA
D3.1a	D3.1	Undaria	0	Manual	DQ	Unknown	Unknown	ddPCR Supermix for Probes (no dUTP)	FAM	0	NA	NA	0.175564	0	20078	0	20078	0	0	0	0	NA	NA	NA	NA	NA	NA	NA	NA	1500	NA	NA	NA	NA	NA	NA	NA	NA	NA	NA	NA	NA	NA	0	615.871	615.871	NA	NA	NA
D3.1b	D3.1	Undaria	0	Manual	DQ	Unknown	Unknown	ddPCR Supermix for Probes (no dUTP)	FAM	0	NA	NA	0.161052	0	21887	0	21887	0	0	0	0	NA	NA	NA	NA	NA	NA	NA	NA	1500	NA	NA	NA	NA	NA	NA	NA	NA	NA	NA	NA	NA	NA	0	603.609	603.609	NA	NA	NA
D3.2a	D3.2	Undaria	0	Manual	DQ	Unknown	Unknown	ddPCR Supermix for Probes (no dUTP)	FAM	0	NA	NA	0.183125	0	19249	0	19249	0	0	0	0	NA	NA	NA	NA	NA	NA	NA	NA	1500	NA	NA	NA	NA	NA	NA	NA	NA	NA	NA	NA	NA	NA	0	616.498	616.498	NA	NA	NA
D3.2b	D3.2	Undaria	0	Manual	DQ	Unknown	Unknown	ddPCR Supermix for Probes (no dUTP)	FAM	0	NA	NA	0.17465	0	20183	0	20183	0	0	0	0	NA	NA	NA	NA	NA	NA	NA	NA	1500	NA	NA	NA	NA	NA	NA	NA	NA	NA	NA	NA	NA	NA	0	624.457	624.457	NA	NA	NA
D3.3B	D3.3	Undaria	0	Manual	DQ	Unknown	Unknown	ddPCR Supermix for Probes (no dUTP)	FAM	0	NA	NA	0.17242	0	20444	0	20444	0	0	0	0	NA	NA	NA	NA	NA	NA	NA	NA	1500	NA	NA	NA	NA	NA	NA	NA	NA	NA	NA	NA	NA	NA	0	629.579	629.579	NA	NA	NA
D3.3P	D3.3	Undaria	0	Manual	DQ	Unknown	Unknown	ddPCR Supermix for Probes (no dUTP)	FAM	0	NA	NA	0.173251	0	20346	0	20346	0	0	0	0	NA	NA	NA	NA	NA	NA	NA	NA	1500	NA	NA	NA	NA	NA	NA	NA	NA	NA	NA	NA	NA	NA	0	621.431	621.431	NA	NA	NA
S4.1a	S4.1	Undaria	0	Manual	DQ	Unknown	Unknown	ddPCR Supermix for Probes (no dUTP)	FAM	0	NA	NA	0.17174	0	20525	0	20525	0	0	0	0	NA	NA	NA	NA	NA	NA	NA	NA	1500	NA	NA	NA	NA	NA	NA	NA	NA	NA	NA	NA	NA	NA	0	621.183	621.183	NA	NA	NA
S4.1b	S4.1	Undaria	0	Manual	DQ	Unknown	Unknown	ddPCR Supermix for Probes (no dUTP)	FAM	0	NA	NA	0.173763	0	20286	0	20286	0	0	0	0	NA	NA	NA	NA	NA	NA	NA	NA	1500	NA	NA	NA	NA	NA	NA	NA	NA	NA	NA	NA	NA	NA	0	621.949	621.949	NA	NA	NA
S4.2a	S4.2	Undaria	0.0576376	Manual	DQ	Unknown	Unknown	ddPCR Supermix for Probes (no dUTP)	FAM	1.15275	NA	NA	0.275303	0.00242072	20412	1	20411	0	0	0	0	NA	NA	NA	NA	NA	NA	NA	NA	1500	NA	NA	NA	NA	NA	NA	NA	NA	NA	NA	NA	NA	NA	1909.8	619.41	619.473	NA	NA	NA
S4.2b	S4.2	Undaria	0.0572701	Manual	DQ	Unknown	Unknown	ddPCR Supermix for Probes (no dUTP)	FAM	1.1454	NA	NA	0.273547	0.00240529	20543	1	20542	0	0	0	0	NA	NA	NA	NA	NA	NA	NA	NA	1500	NA	NA	NA	NA	NA	NA	NA	NA	NA	NA	NA	NA	NA	17086.5	619.54	620.341	NA	NA	NA
S4.3a	S4.3	Undaria	0	Manual	DQ	Unknown	Unknown	ddPCR Supermix for Probes (no dUTP)	FAM	0	NA	NA	0.162695	0	21666	0	21666	0	0	0	0	NA	NA	NA	NA	NA	NA	NA	NA	1500	NA	NA	NA	NA	NA	NA	NA	NA	NA	NA	NA	NA	NA	0	608.611	608.611	NA	NA	NA
S4.3b	S4.3	Undaria	0	Manual	DQ	Unknown	Unknown	ddPCR Supermix for Probes (no dUTP)	FAM	0	NA	NA	0.174426	0	20209	0	20209	0	0	0	0	NA	NA	NA	NA	NA	NA	NA	NA	1500	NA	NA	NA	NA	NA	NA	NA	NA	NA	NA	NA	NA	NA	0	618.932	618.932	NA	NA	NA
M4.1a	M4.1	Undaria	0	Manual	DQ	Unknown	Unknown	ddPCR Supermix for Probes (no dUTP)	FAM	0	NA	NA	0.17415	0	20241	0	20241	0	0	0	0	NA	NA	NA	NA	NA	NA	NA	NA	1500	NA	NA	NA	NA	NA	NA	NA	NA	NA	NA	NA	NA	NA	0	615.591	615.591	NA	NA	NA
M4.1b	M4.1	Undaria	0	Manual	DQ	Unknown	Unknown	ddPCR Supermix for Probes (no dUTP)	FAM	0	NA	NA	0.178561	0	19741	0	19741	0	0	0	0	NA	NA	NA	NA	NA	NA	NA	NA	1500	NA	NA	NA	NA	NA	NA	NA	NA	NA	NA	NA	NA	NA	0	622.338	622.338	NA	NA	NA
M4.2a	M4.2	Undaria	0	Manual	DQ	Unknown	Unknown	ddPCR Supermix for Probes (no dUTP)	FAM	0	NA	NA	0.185692	0	18983	0	18983	0	0	0	0	NA	NA	NA	NA	NA	NA	NA	NA	1500	NA	NA	NA	NA	NA	NA	NA	NA	NA	NA	NA	NA	NA	0	622.39	622.39	NA	NA	NA
M4.2b	M4.2	Undaria	0	Manual	DQ	Unknown	Unknown	ddPCR Supermix for Probes (no dUTP)	FAM	0	NA	NA	0.164058	0	21486	0	21486	0	0	0	0	NA	NA	NA	NA	NA	NA	NA	NA	1500	NA	NA	NA	NA	NA	NA	NA	NA	NA	NA	NA	NA	NA	0	618.431	618.431	NA	NA	NA
M4.3a	M4.3	Undaria	0	Manual	DQ	Unknown	Unknown	ddPCR Supermix for Probes (no dUTP)	FAM	0	NA	NA	0.175774	0	20054	0	20054	0	0	0	0	NA	NA	NA	NA	NA	NA	NA	NA	1500	NA	NA	NA	NA	NA	NA	NA	NA	NA	NA	NA	NA	NA	0	624.789	624.789	NA	NA	NA
M4.3b	M4.3	Undaria	0	Manual	DQ	Unknown	Unknown	ddPCR Supermix for Probes (no dUTP)	FAM	0	NA	NA	0.180131	0	19569	0	19569	0	0	0	0	NA	NA	NA	NA	NA	NA	NA	NA	1500	NA	NA	NA	NA	NA	NA	NA	NA	NA	NA	NA	NA	NA	0	613.655	613.655	NA	NA	NA
N4.1a	N4.1	Undaria	0	Manual	DQ	Unknown	Unknown	ddPCR Supermix for Probes (no dUTP)	FAM	0	NA	NA	0.180722	0	19505	0	19505	0	0	0	0	NA	NA	NA	NA	NA	NA	NA	NA	1500	NA	NA	NA	NA	NA	NA	NA	NA	NA	NA	NA	NA	NA	0	625.534	625.534	NA	NA	NA
N4.1b	N4.1	Undaria	0	Manual	DQ	Unknown	Unknown	ddPCR Supermix for Probes (no dUTP)	FAM	0	NA	NA	0.171456	0	20559	0	20559	0	0	0	0	NA	NA	NA	NA	NA	NA	NA	NA	1500	NA	NA	NA	NA	NA	NA	NA	NA	NA	NA	NA	NA	NA	0	622.067	622.067	NA	NA	NA
N4.2a	N4.2	Undaria	0	Manual	DQ	Unknown	Unknown	ddPCR Supermix for Probes (no dUTP)	FAM	0	NA	NA	0.170634	0	20658	0	20658	0	0	0	0	NA	NA	NA	NA	NA	NA	NA	NA	1500	NA	NA	NA	NA	NA	NA	NA	NA	NA	NA	NA	NA	NA	0	627.914	627.914	NA	NA	NA
N4.2b	N4.2	Undaria	0	Manual	DQ	Unknown	Unknown	ddPCR Supermix for Probes (no dUTP)	FAM	0	NA	NA	0.188795	0	18671	0	18671	0	0	0	0	NA	NA	NA	NA	NA	NA	NA	NA	1500	NA	NA	NA	NA	NA	NA	NA	NA	NA	NA	NA	NA	NA	0	642.249	642.249	NA	NA	NA
N4.3a	N4.3	Undaria	0	Manual	DQ	Unknown	Unknown	ddPCR Supermix for Probes (no dUTP)	FAM	0	NA	NA	0.177715	0	19835	0	19835	0	0	0	0	NA	NA	NA	NA	NA	NA	NA	NA	1500	NA	NA	NA	NA	NA	NA	NA	NA	NA	NA	NA	NA	NA	0	619.986	619.986	NA	NA	NA
N4.3b	N4.3	Undaria	0	Manual	DQ	Unknown	Unknown	ddPCR Supermix for Probes (no dUTP)	FAM	0	NA	NA	0.184303	0	19126	0	19126	0	0	0	0	NA	NA	NA	NA	NA	NA	NA	NA	1500	NA	NA	NA	NA	NA	NA	NA	NA	NA	NA	NA	NA	NA	0	623.005	623.005	NA	NA	NA
D4.1a	D4.1	Undaria	0	Manual	DQ	Unknown	Unknown	ddPCR Supermix for Probes (no dUTP)	FAM	0	NA	NA	0.168119	0	20967	0	20967	0	0	0	0	NA	NA	NA	NA	NA	NA	NA	NA	1500	NA	NA	NA	NA	NA	NA	NA	NA	NA	NA	NA	NA	NA	0	635.645	635.645	NA	NA	NA
D4.1b	D4.1	Undaria	0	Manual	DQ	Unknown	Unknown	ddPCR Supermix for Probes (no dUTP)	FAM	0	NA	NA	0.180389	0	19541	0	19541	0	0	0	0	NA	NA	NA	NA	NA	NA	NA	NA	1500	NA	NA	NA	NA	NA	NA	NA	NA	NA	NA	NA	NA	NA	0	630.487	630.487	NA	NA	NA
D4.2a	D4.2	Undaria	0	Manual	DQ	Unknown	Unknown	ddPCR Supermix for Probes (no dUTP)	FAM	0	NA	NA	0.170436	0	20682	0	20682	0	0	0	0	NA	NA	NA	NA	NA	NA	NA	NA	1500	NA	NA	NA	NA	NA	NA	NA	NA	NA	NA	NA	NA	NA	0	627.1	627.1	NA	NA	NA
D4.2b	D4.2	Undaria	0	Manual	DQ	Unknown	Unknown	ddPCR Supermix for Probes (no dUTP)	FAM	0	NA	NA	0.170601	0	20662	0	20662	0	0	0	0	NA	NA	NA	NA	NA	NA	NA	NA	1500	NA	NA	NA	NA	NA	NA	NA	NA	NA	NA	NA	NA	NA	0	620.776	620.776	NA	NA	NA
D4.3a	D4.3	Undaria	0	Manual	DQ	Unknown	Unknown	ddPCR Supermix for Probes (no dUTP)	FAM	0	NA	NA	0.171757	0	20523	0	20523	0	0	0	0	NA	NA	NA	NA	NA	NA	NA	NA	1500	NA	NA	NA	NA	NA	NA	NA	NA	NA	NA	NA	NA	NA	0	625.186	625.186	NA	NA	NA
D4.3b	D4.3	Undaria	0	Manual	DQ	Unknown	Unknown	ddPCR Supermix for Probes (no dUTP)	FAM	0	NA	NA	0.168788	0	20884	0	20884	0	0	0	0	NA	NA	NA	NA	NA	NA	NA	NA	1500	NA	NA	NA	NA	NA	NA	NA	NA	NA	NA	NA	NA	NA	0	633.372	633.372	NA	NA	NA
S5.1B	S5.1	Undaria	0	Manual	DQ	Unknown	Unknown	ddPCR Supermix for Probes (no dUTP)	FAM	0	NA	NA	0.184467	0	19109	0	19109	0	0	0	0	NA	NA	NA	NA	NA	NA	NA	NA	1500	NA	NA	NA	NA	NA	NA	NA	NA	NA	NA	NA	NA	NA	0	630.984	630.984	NA	NA	NA
S5.1P	S5.1	Undaria	0	Manual	DQ	Unknown	Unknown	ddPCR Supermix for Probes (no dUTP)	FAM	0	NA	NA	0.189904	0	18562	0	18562	0	0	0	0	NA	NA	NA	NA	NA	NA	NA	NA	1500	NA	NA	NA	NA	NA	NA	NA	NA	NA	NA	NA	NA	NA	0	635.169	635.169	NA	NA	NA
S5.1a*	S5.1	Undaria	0.0589577	Manual	DQ	Unknown	Unknown	ddPCR Supermix for Probes (no dUTP)	FAM	1.17915	NA	NA	0.281608	0.00247616	19955	1	19954	0	0	0	0	NA	NA	NA	NA	NA	NA	NA	NA	1500	NA	NA	NA	NA	NA	NA	NA	NA	NA	NA	NA	NA	NA	4537.85	641.267	641.462	NA	NA	NA
S5.1b*	S5.1	Undaria	0.0579243	Manual	DQ	Unknown	Unknown	ddPCR Supermix for Probes (no dUTP)	FAM	1.15849	NA	NA	0.276672	0.00243276	20311	1	20310	0	0	0	0	NA	NA	NA	NA	NA	NA	NA	NA	1500	NA	NA	NA	NA	NA	NA	NA	NA	NA	NA	NA	NA	NA	2385.62	624.613	624.7	NA	NA	NA
S5.2a	S5.2	Undaria	0	Manual	DQ	Unknown	Unknown	ddPCR Supermix for Probes (no dUTP)	FAM	0	NA	NA	0.16171	0	21798	0	21798	0	0	0	0	NA	NA	NA	NA	NA	NA	NA	NA	1500	NA	NA	NA	NA	NA	NA	NA	NA	NA	NA	NA	NA	NA	0	632.767	632.767	NA	NA	NA
S5.2b	S5.2	Undaria	0	Manual	DQ	Unknown	Unknown	ddPCR Supermix for Probes (no dUTP)	FAM	0	NA	NA	0.168095	0	20970	0	20970	0	0	0	0	NA	NA	NA	NA	NA	NA	NA	NA	1500	NA	NA	NA	NA	NA	NA	NA	NA	NA	NA	NA	NA	NA	0	635.802	635.802	NA	NA	NA
S5.3a	S5.3	Undaria	0	Manual	DQ	Unknown	Unknown	ddPCR Supermix for Probes (no dUTP)	FAM	0	NA	NA	0.169111	0	20844	0	20844	0	0	0	0	NA	NA	NA	NA	NA	NA	NA	NA	1500	NA	NA	NA	NA	NA	NA	NA	NA	NA	NA	NA	NA	NA	0	630.186	630.186	NA	NA	NA
S5.3b	S5.3	Undaria	0	Manual	DQ	Unknown	Unknown	ddPCR Supermix for Probes (no dUTP)	FAM	0	NA	NA	0.192056	0	18354	0	18354	0	0	0	0	NA	NA	NA	NA	NA	NA	NA	NA	1500	NA	NA	NA	NA	NA	NA	NA	NA	NA	NA	NA	NA	NA	0	684.522	684.522	NA	NA	NA
Blank 3	Blank 3	Undaria	0	Manual	DQ	Unknown	Unknown	ddPCR Supermix for Probes (no dUTP)	FAM	0	NA	NA	0.178092	0	19793	0	19793	0	0	0	0	NA	NA	NA	NA	NA	NA	NA	NA	1500	NA	NA	NA	NA	NA	NA	NA	NA	NA	NA	NA	NA	NA	0	645.505	645.505	NA	NA	NA
Neg	Neg	Undaria	0	Manual	DQ	Unknown	Unknown	ddPCR Supermix for Probes (no dUTP)	FAM	0	NA	NA	0.180852	0	19491	0	19491	0	0	0	0	NA	NA	NA	NA	NA	NA	NA	NA	1500	NA	NA	NA	NA	NA	NA	NA	NA	NA	NA	NA	NA	NA	0	638.556	638.556	NA	NA	NA
Pos1:100	Pos1:100	Undaria	10.4236	Manual	DQ	Unknown	Unknown	ddPCR Supermix for Probes (no dUTP)	FAM	208.472	NA	NA	11.9474	8.90181	20406	180	20226	0	0	0	0	NA	NA	NA	NA	NA	NA	NA	NA	1500	NA	NA	NA	NA	NA	NA	NA	NA	NA	NA	NA	NA	NA	1908.51	627.223	638.525	NA	NA	NA
Blank 4	Blank 4	Undaria	0	Manual	DQ	Unknown	Unknown	ddPCR Supermix for Probes (no dUTP)	FAM	0	NA	NA	0.183287	0	19232	0	19232	0	0	0	0	NA	NA	NA	NA	NA	NA	NA	NA	1500	NA	NA	NA	NA	NA	NA	NA	NA	NA	NA	NA	NA	NA	0	644.112	644.112	NA	NA	NA
M5.1a	M5.1	Undaria	0	Manual	DQ	Unknown	Unknown	ddPCR Supermix for Probes (no dUTP)	FAM	0	NA	NA	0.180343	0	19546	0	19546	0	0	0	0	NA	NA	NA	NA	NA	NA	NA	NA	1500	NA	NA	NA	NA	NA	NA	NA	NA	NA	NA	NA	NA	NA	0	640.138	640.138	NA	NA	NA
M5.1b	M5.1	Undaria	0	Manual	DQ	Unknown	Unknown	ddPCR Supermix for Probes (no dUTP)	FAM	0	NA	NA	0.168553	0	20913	0	20913	0	0	0	0	NA	NA	NA	NA	NA	NA	NA	NA	1500	NA	NA	NA	NA	NA	NA	NA	NA	NA	NA	NA	NA	NA	0	632.879	632.879	NA	NA	NA
M5.2T	M5.2	Undaria	0	Manual	DQ	Unknown	Unknown	ddPCR Supermix for Probes (no dUTP)	FAM	0	NA	NA	0.169241	0	20828	0	20828	0	0	0	0	NA	NA	NA	NA	NA	NA	NA	NA	1500	NA	NA	NA	NA	NA	NA	NA	NA	NA	NA	NA	NA	NA	0	631.993	631.993	NA	NA	NA
M5.2P	M5.2	Undaria	0	Manual	DQ	Unknown	Unknown	ddPCR Supermix for Probes (no dUTP)	FAM	0	NA	NA	0.165026	0	21360	0	21360	0	0	0	0	NA	NA	NA	NA	NA	NA	NA	NA	1500	NA	NA	NA	NA	NA	NA	NA	NA	NA	NA	NA	NA	NA	0	630.247	630.247	NA	NA	NA
M5.3a	M5.3	Undaria	0	Manual	DQ	Unknown	Unknown	ddPCR Supermix for Probes (no dUTP)	FAM	0	NA	NA	0.173627	0	20302	0	20302	0	0	0	0	NA	NA	NA	NA	NA	NA	NA	NA	1500	NA	NA	NA	NA	NA	NA	NA	NA	NA	NA	NA	NA	NA	0	646.604	646.604	NA	NA	NA
M5.3b	M5.3	Undaria	0	Manual	DQ	Unknown	Unknown	ddPCR Supermix for Probes (no dUTP)	FAM	0	NA	NA	0.162507	0	21691	0	21691	0	0	0	0	NA	NA	NA	NA	NA	NA	NA	NA	1500	NA	NA	NA	NA	NA	NA	NA	NA	NA	NA	NA	NA	NA	0	646.682	646.682	NA	NA	NA
N5.1a	N5.1	Undaria	0	Manual	DQ	Unknown	Unknown	ddPCR Supermix for Probes (no dUTP)	FAM	0	NA	NA	0.173738	0	20289	0	20289	0	0	0	0	NA	NA	NA	NA	NA	NA	NA	NA	1500	NA	NA	NA	NA	NA	NA	NA	NA	NA	NA	NA	NA	NA	0	641.736	641.736	NA	NA	NA
N5.1b	N5.1	Undaria	0	Manual	DQ	Unknown	Unknown	ddPCR Supermix for Probes (no dUTP)	FAM	0	NA	NA	0.177616	0	19846	0	19846	0	0	0	0	NA	NA	NA	NA	NA	NA	NA	NA	1500	NA	NA	NA	NA	NA	NA	NA	NA	NA	NA	NA	NA	NA	0	645.832	645.832	NA	NA	NA
N5.2a	N5.2	Undaria	0	Manual	DQ	Unknown	Unknown	ddPCR Supermix for Probes (no dUTP)	FAM	0	NA	NA	0.164825	0	21386	0	21386	0	0	0	0	NA	NA	NA	NA	NA	NA	NA	NA	1500	NA	NA	NA	NA	NA	NA	NA	NA	NA	NA	NA	NA	NA	0	636.148	636.148	NA	NA	NA
N5.2b	N5.2	Undaria	0	Manual	DQ	Unknown	Unknown	ddPCR Supermix for Probes (no dUTP)	FAM	0	NA	NA	0.180186	0	19563	0	19563	0	0	0	0	NA	NA	NA	NA	NA	NA	NA	NA	1500	NA	NA	NA	NA	NA	NA	NA	NA	NA	NA	NA	NA	NA	0	652.817	652.817	NA	NA	NA
N5.3a	N5.3	Undaria	0.0572422	Manual	DQ	Unknown	Unknown	ddPCR Supermix for Probes (no dUTP)	FAM	1.14484	NA	NA	0.273414	0.00240412	20553	1	20552	0	0	0	0	NA	NA	NA	NA	NA	NA	NA	NA	1500	NA	NA	NA	NA	NA	NA	NA	NA	NA	NA	NA	NA	NA	2102.11	650.681	650.752	NA	NA	NA
N5.3b	N5.3	Undaria	0	Manual	DQ	Unknown	Unknown	ddPCR Supermix for Probes (no dUTP)	FAM	0	NA	NA	0.183966	0	19161	0	19161	0	0	0	0	NA	NA	NA	NA	NA	NA	NA	NA	1500	NA	NA	NA	NA	NA	NA	NA	NA	NA	NA	NA	NA	NA	0	648.106	648.106	NA	NA	NA
D5.1a	D5.1	Undaria	0	Manual	DQ	Unknown	Unknown	ddPCR Supermix for Probes (no dUTP)	FAM	0	NA	NA	0.166546	0	21165	0	21165	0	0	0	0	NA	NA	NA	NA	NA	NA	NA	NA	1500	NA	NA	NA	NA	NA	NA	NA	NA	NA	NA	NA	NA	NA	0	660.35	660.35	NA	NA	NA
D5.1b	D5.1	Undaria	0	Manual	DQ	Unknown	Unknown	ddPCR Supermix for Probes (no dUTP)	FAM	0	NA	NA	0.178389	0	19760	0	19760	0	0	0	0	NA	NA	NA	NA	NA	NA	NA	NA	1500	NA	NA	NA	NA	NA	NA	NA	NA	NA	NA	NA	NA	NA	0	658.952	658.952	NA	NA	NA
D5.2a	D5.2	Undaria	0	Manual	DQ	Unknown	Unknown	ddPCR Supermix for Probes (no dUTP)	FAM	0	NA	NA	0.176487	0	19973	0	19973	0	0	0	0	NA	NA	NA	NA	NA	NA	NA	NA	1500	NA	NA	NA	NA	NA	NA	NA	NA	NA	NA	NA	NA	NA	0	657.376	657.376	NA	NA	NA
D5.2b	D5.2	Undaria	0	Manual	DQ	Unknown	Unknown	ddPCR Supermix for Probes (no dUTP)	FAM	0	NA	NA	0.181794	0	19390	0	19390	0	0	0	0	NA	NA	NA	NA	NA	NA	NA	NA	1500	NA	NA	NA	NA	NA	NA	NA	NA	NA	NA	NA	NA	NA	0	657.848	657.848	NA	NA	NA
D5.3a	D5.3	Undaria	0	Manual	DQ	Unknown	Unknown	ddPCR Supermix for Probes (no dUTP)	FAM	0	NA	NA	0.198883	0	17724	0	17724	0	0	0	0	NA	NA	NA	NA	NA	NA	NA	NA	1500	NA	NA	NA	NA	NA	NA	NA	NA	NA	NA	NA	NA	NA	0	671.274	671.274	NA	NA	NA
D5.3b	D5.3	Undaria	0	Manual	DQ	Unknown	Unknown	ddPCR Supermix for Probes (no dUTP)	FAM	0	NA	NA	0.186576	0	18893	0	18893	0	0	0	0	NA	NA	NA	NA	NA	NA	NA	NA	1500	NA	NA	NA	NA	NA	NA	NA	NA	NA	NA	NA	NA	NA	0	661.049	661.049	NA	NA	NA
N6.1a	N6.1	Undaria	0	Manual	DQ	Unknown	Unknown	ddPCR Supermix for Probes (no dUTP)	FAM	0	NA	NA	0.181485	0	19423	0	19423	0	0	0	0	NA	NA	NA	NA	NA	NA	NA	NA	1500	NA	NA	NA	NA	NA	NA	NA	NA	NA	NA	NA	NA	NA	0	662.289	662.289	NA	NA	NA
N6.1b	N6.1	Undaria	0	Manual	DQ	Unknown	Unknown	ddPCR Supermix for Probes (no dUTP)	FAM	0	NA	NA	0.184303	0	19126	0	19126	0	0	0	0	NA	NA	NA	NA	NA	NA	NA	NA	1500	NA	NA	NA	NA	NA	NA	NA	NA	NA	NA	NA	NA	NA	0	680.055	680.055	NA	NA	NA
N6.2a	N6.2	Undaria	0	Manual	DQ	Unknown	Unknown	ddPCR Supermix for Probes (no dUTP)	FAM	0	NA	NA	0.178642	0	19732	0	19732	0	0	0	0	NA	NA	NA	NA	NA	NA	NA	NA	1500	NA	NA	NA	NA	NA	NA	NA	NA	NA	NA	NA	NA	NA	0	671.322	671.322	NA	NA	NA
N6.2b	N6.2	Undaria	0	Manual	DQ	Unknown	Unknown	ddPCR Supermix for Probes (no dUTP)	FAM	0	NA	NA	0.175398	0	20097	0	20097	0	0	0	0	NA	NA	NA	NA	NA	NA	NA	NA	1500	NA	NA	NA	NA	NA	NA	NA	NA	NA	NA	NA	NA	NA	0	659.871	659.871	NA	NA	NA
N6.3a	N6.3	Undaria	0	Manual	DQ	Unknown	Unknown	ddPCR Supermix for Probes (no dUTP)	FAM	0	NA	NA	0.181195	0	19454	0	19454	0	0	0	0	NA	NA	NA	NA	NA	NA	NA	NA	1500	NA	NA	NA	NA	NA	NA	NA	NA	NA	NA	NA	NA	NA	0	666.717	666.717	NA	NA	NA
N6.3b	N6.3	Undaria	0	Manual	DQ	Unknown	Unknown	ddPCR Supermix for Probes (no dUTP)	FAM	0	NA	NA	0.181457	0	19426	0	19426	0	0	0	0	NA	NA	NA	NA	NA	NA	NA	NA	1500	NA	NA	NA	NA	NA	NA	NA	NA	NA	NA	NA	NA	NA	0	671.682	671.682	NA	NA	NA
D6.1a	D6.1	Undaria	0	Manual	DQ	Unknown	Unknown	ddPCR Supermix for Probes (no dUTP)	FAM	0	NA	NA	0.18576	0	18976	0	18976	0	0	0	0	NA	NA	NA	NA	NA	NA	NA	NA	1500	NA	NA	NA	NA	NA	NA	NA	NA	NA	NA	NA	NA	NA	0	692.495	692.495	NA	NA	NA
D6.1b	D6.1	Undaria	0	Manual	DQ	Unknown	Unknown	ddPCR Supermix for Probes (no dUTP)	FAM	0	NA	NA	0.191763	0	18382	0	18382	0	0	0	0	NA	NA	NA	NA	NA	NA	NA	NA	1500	NA	NA	NA	NA	NA	NA	NA	NA	NA	NA	NA	NA	NA	0	692.415	692.415	NA	NA	NA
D6.2a	D6.2	Undaria	0	Manual	DQ	Unknown	Unknown	ddPCR Supermix for Probes (no dUTP)	FAM	0	NA	NA	0.165639	0	21281	0	21281	0	0	0	0	NA	NA	NA	NA	NA	NA	NA	NA	1500	NA	NA	NA	NA	NA	NA	NA	NA	NA	NA	NA	NA	NA	0	677.806	677.806	NA	NA	NA
D6.2b	D6.2	Undaria	0	Manual	DQ	Unknown	Unknown	ddPCR Supermix for Probes (no dUTP)	FAM	0	NA	NA	0.171916	0	20504	0	20504	0	0	0	0	NA	NA	NA	NA	NA	NA	NA	NA	1500	NA	NA	NA	NA	NA	NA	NA	NA	NA	NA	NA	NA	NA	0	662.076	662.076	NA	NA	NA
D6.3a	D6.3	Undaria	0	Manual	DQ	Unknown	Unknown	ddPCR Supermix for Probes (no dUTP)	FAM	0	NA	NA	0.181363	0	19436	0	19436	0	0	0	0	NA	NA	NA	NA	NA	NA	NA	NA	1500	NA	NA	NA	NA	NA	NA	NA	NA	NA	NA	NA	NA	NA	0	672.838	672.838	NA	NA	NA
D6.3b	D6.3	Undaria	0	Manual	DQ	Unknown	Unknown	ddPCR Supermix for Probes (no dUTP)	FAM	0	NA	NA	0.168425	0	20929	0	20929	0	0	0	0	NA	NA	NA	NA	NA	NA	NA	NA	1500	NA	NA	NA	NA	NA	NA	NA	NA	NA	NA	NA	NA	NA	0	678.657	678.657	NA	NA	NA
(A12 1.1) A02.1a	A12 1.1	Undaria	0	Manual	DQ	Unknown	Unknown	ddPCR Supermix for Probes (no dUTP)	FAM	0	NA	NA	0.173601	0	20305	0	20305	0	0	0	0	NA	NA	NA	NA	NA	NA	NA	NA	1500	NA	NA	NA	NA	NA	NA	NA	NA	NA	NA	NA	NA	NA	0	689.428	689.428	NA	NA	NA
(A12 1.1) A02.1b	A12 1.1	Undaria	0	Manual	DQ	Unknown	Unknown	ddPCR Supermix for Probes (no dUTP)	FAM	0	NA	NA	0.175826	0	20048	0	20048	0	0	0	0	NA	NA	NA	NA	NA	NA	NA	NA	1500	NA	NA	NA	NA	NA	NA	NA	NA	NA	NA	NA	NA	NA	0	676.362	676.362	NA	NA	NA
(A12 1.2) A02.2a	A12 1.2	Undaria	0	Manual	DQ	Unknown	Unknown	ddPCR Supermix for Probes (no dUTP)	FAM	0	NA	NA	0.16197	0	21763	0	21763	0	0	0	0	NA	NA	NA	NA	NA	NA	NA	NA	1500	NA	NA	NA	NA	NA	NA	NA	NA	NA	NA	NA	NA	NA	0	665.582	665.582	NA	NA	NA
(A12 1.2) A02.2b	A12 1.2	Undaria	0	Manual	DQ	Unknown	Unknown	ddPCR Supermix for Probes (no dUTP)	FAM	0	NA	NA	0.169551	0	20790	0	20790	0	0	0	0	NA	NA	NA	NA	NA	NA	NA	NA	1500	NA	NA	NA	NA	NA	NA	NA	NA	NA	NA	NA	NA	NA	0	664.474	664.474	NA	NA	NA
(A12 1.3) A02.3a	A12 1.3	Undaria	0	Manual	DQ	Unknown	Unknown	ddPCR Supermix for Probes (no dUTP)	FAM	0	NA	NA	0.170198	0	20711	0	20711	0	0	0	0	NA	NA	NA	NA	NA	NA	NA	NA	1500	NA	NA	NA	NA	NA	NA	NA	NA	NA	NA	NA	NA	NA	0	666.99	666.99	NA	NA	NA
(A12 1.3) A02.3b	A12 1.3	Undaria	0	Manual	DQ	Unknown	Unknown	ddPCR Supermix for Probes (no dUTP)	FAM	0	NA	NA	0.183842	0	19174	0	19174	0	0	0	0	NA	NA	NA	NA	NA	NA	NA	NA	1500	NA	NA	NA	NA	NA	NA	NA	NA	NA	NA	NA	NA	NA	0	682.04	682.04	NA	NA	NA
Whole sponge 6.2B	Whole sponge 6.2	Undaria	0	Manual	DQ	Unknown	Unknown	ddPCR Supermix for Probes (no dUTP)	FAM	0	NA	NA	0.186162	0	18935	0	18935	0	0	0	0	NA	NA	NA	NA	NA	NA	NA	NA	1500	NA	NA	NA	NA	NA	NA	NA	NA	NA	NA	NA	NA	NA	0	679.919	679.919	NA	NA	NA
Whole sponge 6.2P	Whole sponge 6.2	Undaria	0	Manual	DQ	Unknown	Unknown	ddPCR Supermix for Probes (no dUTP)	FAM	0	NA	NA	0.183641	0	19195	0	19195	0	0	0	0	NA	NA	NA	NA	NA	NA	NA	NA	1500	NA	NA	NA	NA	NA	NA	NA	NA	NA	NA	NA	NA	NA	0	665.798	665.798	NA	NA	NA
Blank Da	Blank Da	Undaria	0	Manual	DQ	Unknown	Unknown	ddPCR Supermix for Probes (no dUTP)	FAM	0	NA	NA	0.183154	0	19246	0	19246	0	0	0	0	NA	NA	NA	NA	NA	NA	NA	NA	1500	NA	NA	NA	NA	NA	NA	NA	NA	NA	NA	NA	NA	NA	0	675.427	675.427	NA	NA	NA
Blank Db	Blank Db	Undaria	0	Manual	DQ	Unknown	Unknown	ddPCR Supermix for Probes (no dUTP)	FAM	0	NA	NA	0.182708	0	19293	0	19293	0	0	0	0	NA	NA	NA	NA	NA	NA	NA	NA	1500	NA	NA	NA	NA	NA	NA	NA	NA	NA	NA	NA	NA	NA	0	696.42	696.42	NA	NA	NA
Blank Ma	Blank Ma	Undaria	0	Manual	DQ	Unknown	Unknown	ddPCR Supermix for Probes (no dUTP)	FAM	0	NA	NA	0.190726	0	18482	0	18482	0	0	0	0	NA	NA	NA	NA	NA	NA	NA	NA	1500	NA	NA	NA	NA	NA	NA	NA	NA	NA	NA	NA	NA	NA	0	701.518	701.518	NA	NA	NA
Blank Mb	Blank Mb	Undaria	0	Manual	DQ	Unknown	Unknown	ddPCR Supermix for Probes (no dUTP)	FAM	0	NA	NA	0.182235	0	19343	0	19343	0	0	0	0	NA	NA	NA	NA	NA	NA	NA	NA	1500	NA	NA	NA	NA	NA	NA	NA	NA	NA	NA	NA	NA	NA	0	688.925	688.925	NA	NA	NA
Blank Na	Blank Na	Undaria	0	Manual	DQ	Unknown	Unknown	ddPCR Supermix for Probes (no dUTP)	FAM	0	NA	NA	0.179142	0	19677	0	19677	0	0	0	0	NA	NA	NA	NA	NA	NA	NA	NA	1500	NA	NA	NA	NA	NA	NA	NA	NA	NA	NA	NA	NA	NA	0	698.643	698.643	NA	NA	NA
Blank Nb	Blank Nb	Undaria	0	Manual	DQ	Unknown	Unknown	ddPCR Supermix for Probes (no dUTP)	FAM	0	NA	NA	0.161851	0	21779	0	21779	0	0	0	0	NA	NA	NA	NA	NA	NA	NA	NA	1500	NA	NA	NA	NA	NA	NA	NA	NA	NA	NA	NA	NA	NA	0	680.696	680.696	NA	NA	NA
Blank 5	Blank 5	Undaria	0	Manual	DQ	Unknown	Unknown	ddPCR Supermix for Probes (no dUTP)	FAM	0	NA	NA	0.167807	0	21006	0	21006	0	0	0	0	NA	NA	NA	NA	NA	NA	NA	NA	1500	NA	NA	NA	NA	NA	NA	NA	NA	NA	NA	NA	NA	NA	0	706.017	706.017	NA	NA	NA
M6.1a	M6.1	Undaria	0.0620452	Manual	DQ	Unknown	Unknown	ddPCR Supermix for Probes (no dUTP)	FAM	1.2409	NA	NA	0.296358	0.00260583	18962	1	18961	0	0	0	0	NA	NA	NA	NA	NA	NA	NA	NA	1500	NA	NA	NA	NA	NA	NA	NA	NA	NA	NA	NA	NA	NA	1661.38	696.189	696.24	NA	NA	NA
M6.1b	M6.1	Undaria	0	Manual	DQ	Unknown	Unknown	ddPCR Supermix for Probes (no dUTP)	FAM	0	NA	NA	0.181494	0	19422	0	19422	0	0	0	0	NA	NA	NA	NA	NA	NA	NA	NA	1500	NA	NA	NA	NA	NA	NA	NA	NA	NA	NA	NA	NA	NA	0	686.342	686.342	NA	NA	NA
M6.2a	M6.2	Undaria	0	Manual	DQ	Unknown	Unknown	ddPCR Supermix for Probes (no dUTP)	FAM	0	NA	NA	0.183861	0	19172	0	19172	0	0	0	0	NA	NA	NA	NA	NA	NA	NA	NA	1500	NA	NA	NA	NA	NA	NA	NA	NA	NA	NA	NA	NA	NA	0	706.221	706.221	NA	NA	NA
M6.2b	M6.2	Undaria	0	Manual	DQ	Unknown	Unknown	ddPCR Supermix for Probes (no dUTP)	FAM	0	NA	NA	0.168876	0	20873	0	20873	0	0	0	0	NA	NA	NA	NA	NA	NA	NA	NA	1500	NA	NA	NA	NA	NA	NA	NA	NA	NA	NA	NA	NA	NA	0	710.8	710.8	NA	NA	NA
M6.3a	M6.3	Undaria	0	Manual	DQ	Unknown	Unknown	ddPCR Supermix for Probes (no dUTP)	FAM	0	NA	NA	0.168893	0	20871	0	20871	0	0	0	0	NA	NA	NA	NA	NA	NA	NA	NA	1500	NA	NA	NA	NA	NA	NA	NA	NA	NA	NA	NA	NA	NA	0	687.325	687.325	NA	NA	NA
M6.3b	M6.3	Undaria	0	Manual	DQ	Unknown	Unknown	ddPCR Supermix for Probes (no dUTP)	FAM	0	NA	NA	0.166405	0	21183	0	21183	0	0	0	0	NA	NA	NA	NA	NA	NA	NA	NA	1500	NA	NA	NA	NA	NA	NA	NA	NA	NA	NA	NA	NA	NA	0	690.701	690.701	NA	NA	NA
S6.1a	S6.1	Undaria	0	Manual	DQ	Unknown	Unknown	ddPCR Supermix for Probes (no dUTP)	FAM	0	NA	NA	0.183938	0	19164	0	19164	0	0	0	0	NA	NA	NA	NA	NA	NA	NA	NA	1500	NA	NA	NA	NA	NA	NA	NA	NA	NA	NA	NA	NA	NA	0	700.481	700.481	NA	NA	NA
S6.1b	S6.1	Undaria	0	Manual	DQ	Unknown	Unknown	ddPCR Supermix for Probes (no dUTP)	FAM	0	NA	NA	0.17498	0	20145	0	20145	0	0	0	0	NA	NA	NA	NA	NA	NA	NA	NA	1500	NA	NA	NA	NA	NA	NA	NA	NA	NA	NA	NA	NA	NA	0	695.182	695.182	NA	NA	NA
S6.2a	S6.2	Undaria	0	Manual	DQ	Unknown	Unknown	ddPCR Supermix for Probes (no dUTP)	FAM	0	NA	NA	0.184893	0	19065	0	19065	0	0	0	0	NA	NA	NA	NA	NA	NA	NA	NA	1500	NA	NA	NA	NA	NA	NA	NA	NA	NA	NA	NA	NA	NA	0	692.292	692.292	NA	NA	NA
S6.2b	S6.2	Undaria	0	Manual	DQ	Unknown	Unknown	ddPCR Supermix for Probes (no dUTP)	FAM	0	NA	NA	0.16441	0	21440	0	21440	0	0	0	0	NA	NA	NA	NA	NA	NA	NA	NA	1500	NA	NA	NA	NA	NA	NA	NA	NA	NA	NA	NA	NA	NA	0	692.809	692.809	NA	NA	NA
S6.3a	S6.3	Undaria	0	Manual	DQ	Unknown	Unknown	ddPCR Supermix for Probes (no dUTP)	FAM	0	NA	NA	0.192098	0	18350	0	18350	0	0	0	0	NA	NA	NA	NA	NA	NA	NA	NA	1500	NA	NA	NA	NA	NA	NA	NA	NA	NA	NA	NA	NA	NA	0	731.856	731.856	NA	NA	NA
S6.3b	S6.3	Undaria	0	Manual	DQ	Unknown	Unknown	ddPCR Supermix for Probes (no dUTP)	FAM	0	NA	NA	0.16991	0	20746	0	20746	0	0	0	0	NA	NA	NA	NA	NA	NA	NA	NA	1500	NA	NA	NA	NA	NA	NA	NA	NA	NA	NA	NA	NA	NA	0	699.056	699.056	NA	NA	NA
(Blank A) Labelled Blank Buffer??a	(Blank A) Labelled Blank Buffer??a	Undaria	0	Manual	DQ	Unknown	Unknown	ddPCR Supermix for Probes (no dUTP)	FAM	0	NA	NA	0.186094	0	18942	0	18942	0	0	0	0	NA	NA	NA	NA	NA	NA	NA	NA	1500	NA	NA	NA	NA	NA	NA	NA	NA	NA	NA	NA	NA	NA	0	684.942	684.942	NA	NA	NA
(Blank A) Labelled Blank Buffer??b	(Blank A) Labelled Blank Buffer??b	Undaria	0	Manual	DQ	Unknown	Unknown	ddPCR Supermix for Probes (no dUTP)	FAM	0	NA	NA	0.182708	0	19293	0	19293	0	0	0	0	NA	NA	NA	NA	NA	NA	NA	NA	1500	NA	NA	NA	NA	NA	NA	NA	NA	NA	NA	NA	NA	NA	0	694.651	694.651	NA	NA	NA
Blank Whole Sponge a	Blank Whole Sponge a	Undaria	0	Manual	DQ	Unknown	Unknown	ddPCR Supermix for Probes (no dUTP)	FAM	0	NA	NA	0.179087	0	19683	0	19683	0	0	0	0	NA	NA	NA	NA	NA	NA	NA	NA	1500	NA	NA	NA	NA	NA	NA	NA	NA	NA	NA	NA	NA	NA	0	719.676	719.676	NA	NA	NA
Blank Whole Sponge b	Blank Whole Sponge b	Undaria	0	Manual	DQ	Unknown	Unknown	ddPCR Supermix for Probes (no dUTP)	FAM	0	NA	NA	0.174331	0	20220	0	20220	0	0	0	0	NA	NA	NA	NA	NA	NA	NA	NA	1500	NA	NA	NA	NA	NA	NA	NA	NA	NA	NA	NA	NA	NA	0	690.529	690.529	NA	NA	NA
Whole sponge WS1.1a	Whole sponge WS1.1	Undaria	0	Manual	DQ	Unknown	Unknown	ddPCR Supermix for Probes (no dUTP)	FAM	0	NA	NA	0.182028	0	19365	0	19365	0	0	0	0	NA	NA	NA	NA	NA	NA	NA	NA	1500	NA	NA	NA	NA	NA	NA	NA	NA	NA	NA	NA	NA	NA	0	686.898	686.898	NA	NA	NA
Whole sponge WS 1.1b	Whole sponge WS 1.1	Undaria	0	Manual	DQ	Unknown	Unknown	ddPCR Supermix for Probes (no dUTP)	FAM	0	NA	NA	0.176152	0	20011	0	20011	0	0	0	0	NA	NA	NA	NA	NA	NA	NA	NA	1500	NA	NA	NA	NA	NA	NA	NA	NA	NA	NA	NA	NA	NA	0	668.81	668.81	NA	NA	NA
Whole sponge WS1.2a	Whole sponge WS1.2	Undaria	0	Manual	DQ	Unknown	Unknown	ddPCR Supermix for Probes (no dUTP)	FAM	0	NA	NA	0.186626	0	18888	0	18888	0	0	0	0	NA	NA	NA	NA	NA	NA	NA	NA	1500	NA	NA	NA	NA	NA	NA	NA	NA	NA	NA	NA	NA	NA	0	705.722	705.722	NA	NA	NA
Whole sponge WS1.2b	Whole sponge WS1.2	Undaria	0	Manual	DQ	Unknown	Unknown	ddPCR Supermix for Probes (no dUTP)	FAM	0	NA	NA	0.180278	0	19553	0	19553	0	0	0	0	NA	NA	NA	NA	NA	NA	NA	NA	1500	NA	NA	NA	NA	NA	NA	NA	NA	NA	NA	NA	NA	NA	0	684.994	684.994	NA	NA	NA
Whole sponge WS1.3a	Whole sponge WS1.3	Undaria	0	Manual	DQ	Unknown	Unknown	ddPCR Supermix for Probes (no dUTP)	FAM	0	NA	NA	0.180787	0	19498	0	19498	0	0	0	0	NA	NA	NA	NA	NA	NA	NA	NA	1500	NA	NA	NA	NA	NA	NA	NA	NA	NA	NA	NA	NA	NA	0	672.152	672.152	NA	NA	NA
Whole sponge WS1.3b	Whole sponge WS1.3	Undaria	0	Manual	DQ	Unknown	Unknown	ddPCR Supermix for Probes (no dUTP)	FAM	0	NA	NA	0.164028	0	21490	0	21490	0	0	0	0	NA	NA	NA	NA	NA	NA	NA	NA	1500	NA	NA	NA	NA	NA	NA	NA	NA	NA	NA	NA	NA	NA	0	693.896	693.896	NA	NA	NA
Whole sponge WS2.1	Whole sponge WS2.1	Undaria	0	Manual	DQ	Unknown	Unknown	ddPCR Supermix for Probes (no dUTP)	FAM	0	NA	NA	0.16259	0	21680	0	21680	0	0	0	0	NA	NA	NA	NA	NA	NA	NA	NA	1500	NA	NA	NA	NA	NA	NA	NA	NA	NA	NA	NA	NA	NA	0	694.101	694.101	NA	NA	NA
Whole sponge WS2.2	Whole sponge WS2.2	Undaria	0	Manual	DQ	Unknown	Unknown	ddPCR Supermix for Probes (no dUTP)	FAM	0	NA	NA	0.185243	0	19029	0	19029	0	0	0	0	NA	NA	NA	NA	NA	NA	NA	NA	1500	NA	NA	NA	NA	NA	NA	NA	NA	NA	NA	NA	NA	NA	0	704.365	704.365	NA	NA	NA
Whole sponge WS2.3	Whole sponge WS2.3	Undaria	0	Manual	DQ	Unknown	Unknown	ddPCR Supermix for Probes (no dUTP)	FAM	0	NA	NA	0.184602	0	19095	0	19095	0	0	0	0	NA	NA	NA	NA	NA	NA	NA	NA	1500	NA	NA	NA	NA	NA	NA	NA	NA	NA	NA	NA	NA	NA	0	691.61	691.61	NA	NA	NA
Whole sponge WS3.1	Whole sponge WS3.1	Undaria	0	Manual	DQ	Unknown	Unknown	ddPCR Supermix for Probes (no dUTP)	FAM	0	NA	NA	0.175651	0	20068	0	20068	0	0	0	0	NA	NA	NA	NA	NA	NA	NA	NA	1500	NA	NA	NA	NA	NA	NA	NA	NA	NA	NA	NA	NA	NA	0	657.534	657.534	NA	NA	NA
Whole sponge WS3.2	Whole sponge WS3.2	Undaria	0	Manual	DQ	Unknown	Unknown	ddPCR Supermix for Probes (no dUTP)	FAM	0	NA	NA	0.206407	0	17078	0	17078	0	0	0	0	NA	NA	NA	NA	NA	NA	NA	NA	1500	NA	NA	NA	NA	NA	NA	NA	NA	NA	NA	NA	NA	NA	0	701.045	701.045	NA	NA	NA
Whole sponge WS3.3	Whole sponge WS3.3	Undaria	0	Manual	DQ	Unknown	Unknown	ddPCR Supermix for Probes (no dUTP)	FAM	0	NA	NA	0.194161	0	18155	0	18155	0	0	0	0	NA	NA	NA	NA	NA	NA	NA	NA	1500	NA	NA	NA	NA	NA	NA	NA	NA	NA	NA	NA	NA	NA	0	687.493	687.493	NA	NA	NA
Whole sponge WS4.1	Whole sponge WS4.1	Undaria	0	Manual	DQ	Unknown	Unknown	ddPCR Supermix for Probes (no dUTP)	FAM	0	NA	NA	0.16996	0	20740	0	20740	0	0	0	0	NA	NA	NA	NA	NA	NA	NA	NA	1500	NA	NA	NA	NA	NA	NA	NA	NA	NA	NA	NA	NA	NA	0	696.842	696.842	NA	NA	NA
Whole sponge WS4.2	Whole sponge WS4.2	Undaria	0	Manual	DQ	Unknown	Unknown	ddPCR Supermix for Probes (no dUTP)	FAM	0	NA	NA	0.178507	0	19747	0	19747	0	0	0	0	NA	NA	NA	NA	NA	NA	NA	NA	1500	NA	NA	NA	NA	NA	NA	NA	NA	NA	NA	NA	NA	NA	0	687.658	687.658	NA	NA	NA
Whole sponge WS4.3	Whole sponge WS4.3	Undaria	0	Manual	DQ	Unknown	Unknown	ddPCR Supermix for Probes (no dUTP)	FAM	0	NA	NA	0.189068	0	18644	0	18644	0	0	0	0	NA	NA	NA	NA	NA	NA	NA	NA	1500	NA	NA	NA	NA	NA	NA	NA	NA	NA	NA	NA	NA	NA	0	695.238	695.238	NA	NA	NA
Whole sponge WS5.1	Whole sponge WS5.1	Undaria	0	Manual	DQ	Unknown	Unknown	ddPCR Supermix for Probes (no dUTP)	FAM	0	NA	NA	0.175223	0	20117	0	20117	0	0	0	0	NA	NA	NA	NA	NA	NA	NA	NA	1500	NA	NA	NA	NA	NA	NA	NA	NA	NA	NA	NA	NA	NA	0	691.779	691.779	NA	NA	NA
Whole sponge WS5.2	Whole sponge WS5.2	Undaria	0	Manual	DQ	Unknown	Unknown	ddPCR Supermix for Probes (no dUTP)	FAM	0	NA	NA	0.186972	0	18853	0	18853	0	0	0	0	NA	NA	NA	NA	NA	NA	NA	NA	1500	NA	NA	NA	NA	NA	NA	NA	NA	NA	NA	NA	NA	NA	0	693.195	693.195	NA	NA	NA
Whole sponge WS5.3	Whole sponge WS5.3	Undaria	0.058934	Manual	DQ	Unknown	Unknown	ddPCR Supermix for Probes (no dUTP)	FAM	1.17868	NA	NA	0.281496	0.00247517	19963	1	19962	0	0	0	0	NA	NA	NA	NA	NA	NA	NA	NA	1500	NA	NA	NA	NA	NA	NA	NA	NA	NA	NA	NA	NA	NA	3320.03	681.917	682.049	NA	NA	NA
Whole sponge WS6.1	Whole sponge WS6.1	Undaria	0	Manual	DQ	Unknown	Unknown	ddPCR Supermix for Probes (no dUTP)	FAM	0	NA	NA	0.175941	0	20035	0	20035	0	0	0	0	NA	NA	NA	NA	NA	NA	NA	NA	1500	NA	NA	NA	NA	NA	NA	NA	NA	NA	NA	NA	NA	NA	0	713.802	713.802	NA	NA	NA
Whole sponge WS6.3	Whole sponge WS6.3	Undaria	0	Manual	DQ	Unknown	Unknown	ddPCR Supermix for Probes (no dUTP)	FAM	0	NA	NA	0.188039	0	18746	0	18746	0	0	0	0	NA	NA	NA	NA	NA	NA	NA	NA	1500	NA	NA	NA	NA	NA	NA	NA	NA	NA	NA	NA	NA	NA	0	690.317	690.317	NA	NA	NA
Blank 6	Blank 6	Undaria	0	Manual	DQ	Unknown	Unknown	ddPCR Supermix for Probes (no dUTP)	FAM	0	NA	NA	0.197148	0	17880	0	17880	0	0	0	0	NA	NA	NA	NA	NA	NA	NA	NA	1500	NA	NA	NA	NA	NA	NA	NA	NA	NA	NA	NA	NA	NA	0	692.941	692.941	NA	NA	NA
S1.3 Repeat	S1.3 Repeat	Undaria	0	Manual	DQ	Unknown	Unknown	ddPCR Supermix for Probes (no dUTP)	FAM	0	NA	NA	0.173695	0	20294	0	20294	0	0	0	0	NA	NA	NA	NA	NA	NA	NA	NA	1500	NA	NA	NA	NA	NA	NA	NA	NA	NA	NA	NA	NA	NA	0	694.007	694.007	NA	NA	NA
N2.3B Repeat	N2.3B Repeat	Undaria	0	Manual	DQ	Unknown	Unknown	ddPCR Supermix for Probes (no dUTP)	FAM	0	NA	NA	0.18413	0	19144	0	19144	0	0	0	0	NA	NA	NA	NA	NA	NA	NA	NA	1500	NA	NA	NA	NA	NA	NA	NA	NA	NA	NA	NA	NA	NA	0	699.385	699.385	NA	NA	NA
D2.1a Repeat	D2.1a Repeat	Undaria	0	Manual	DQ	Unknown	Unknown	ddPCR Supermix for Probes (no dUTP)	FAM	0	NA	NA	0.180472	0	19532	0	19532	0	0	0	0	NA	NA	NA	NA	NA	NA	NA	NA	1500	NA	NA	NA	NA	NA	NA	NA	NA	NA	NA	NA	NA	NA	0	692.599	692.599	NA	NA	NA
Neg	Neg	Undaria	0	Manual	DQ	Unknown	Unknown	ddPCR Supermix for Probes (no dUTP)	FAM	0	NA	NA	0.180731	0	19504	0	19504	0	0	0	0	NA	NA	NA	NA	NA	NA	NA	NA	1500	NA	NA	NA	NA	NA	NA	NA	NA	NA	NA	NA	NA	NA	0	706.04	706.04	NA	NA	NA
Pos1:100	Pos1:100	Undaria	11.1174	Manual	DQ	Unknown	Unknown	ddPCR Supermix for Probes (no dUTP)	FAM	222.348	NA	NA	12.667	9.56986	21052	198	20854	0	0	0	0	NA	NA	NA	NA	NA	NA	NA	NA	1500	NA	NA	NA	NA	NA	NA	NA	NA	NA	NA	NA	NA	NA	2002.55	689.871	702.217	NA	NA	NA
[truncated: 15 more columns]
